# Supplementary material for: A resource for functional profiling of noncoding RNA in the yeast Saccharomyces cerevisiae
Source: RNA. 2017 Aug;23(8):1166–71. doi: 10.1261/rna.061564.117 (PMC5513061; doi:10.1261/rna.061564.117)
Supplement: Supplemental Material [file supp_061564.117_Supplemental_File_1.xlsx]

## Sheet: Sheet1
ncRNA name	Chromosome	Strand	Start of deletion	End of deletion	Distance to closest 5' start codon	Distance to closest 3' start codon	up45 (101mer)	down45 (101 mer)	upTag Barcode	Tag No	downTag Barcode	Tag No	A_confirmation_primer_sequence	B_confirmation_primer_sequence	C_confirmation_primer_sequence	D_confirmation_primer_sequence	AB_wt_PCR	AkanB_del_PCR	CD_wt_PCR	DkanC_del_PCR	AD_wt_PCR	AD_del_PCR
CUT001/437	1	+	30028	30950	2060	617	ATTAATTGGT TTAGCGAAGT ATACATTCTG AAGAACATTT TTGGGGATGTCCACGAGGTCTCTTCTTTCAGGGAGCGAAGTCTCGTACGCTGCAGGTCGAC	AAGCGTTTTATTTTGCAAGAATAATAGCTTCTACACTTTGAATTCCGGTGTCGGTCTCGTAGTAGGAGCCCTGGTCATTTCTATCGATGAATTCGAGCTCG	TCTTTCAGGGAGCGAAGTCT	tag_13925_st	TAGGAGCCCTGGTCATTTCT	tag_13996_st	TGCATCAGAGCTTTCCCTTT	CGACAAGTGGTGCATTGAAA	CGGCACTGTCGGTGTAAAT	TGAATATCTCTTCCTCGCTGTTC	398	790	285	1009	2032	2445
CUT002	1	+	138607	138831	262	321	TCATGTAAGGTGCAGTGAACATTAGCGCTAAGAGGATTGAGGATTGATGTCCACGAGGTCTCTGACCACCCTTAAATTGTTCGCGTACGCTGCAGGTCGAC	AGCTGAAATACAAGCACTGAATAAAAAGAGATAACAATATTTTAACGGTGTCGGTCTCGTAGCCCACATCATCGTTTAACGGATCGATGAATTCGAGCTCG	GACCACCCTTAAATTGTTCG	tag_11696_st	CCCACATCATCGTTTAACGG	tag_11855_st	TACTTCCCCACTCCAAACGA	GTGATATTGGTTCCCTTCTGCT	TTCACAGAGTGGCTTCCTTG	GATTGCTTTTGGCTCCCTTT	786	863	392	887	1056	2409
CUT005	1	+	180255	180511	435	630	ACTGAAAAAACATCTGTATTTATTAAAAGTAAATCAAAAGCAGACGATGTCCACGAGGTCTCTGACTGCTACACATGCGACAGCGTACGCTGCAGGTCGAC	CATTCCGTGATCATAGTTTAAATGCGCTGGCGTATTGGGAGCTCTCGGTGTCGGTCTCGTAGCCGGTTTAATGACTGTTAGGATCGATGAATTCGAGCTCG	GACTGCTACACATGCGACAG	tag_10854_st	CCGGTTTAATGACTGTTAGG	tag_11848_st	CAGGGGAGAGAACACCAGAA	CTGGAGACCTGCTCACTCAA	GATCGAGATTTTTCGTACCTGTG	CCCATTTTCAACGAGGGTAA	659	810	594	1032	1180	2501
CUT008	2	+	237744	237928	277	3355	GGAGCTGTTTTCGGACTGAAAGCCAGTAACAAGCTTGTGTAGGAGGATGTCCACGAGGTCTCTGAGGATCGAGACTCATAGATCGTACGCTGCAGGTCGAC	TTTTGTTAGCATTCTGGTTTGCCAACCTGTTGGTAAAGCACTATTCGGTGTCGGTCTCGTAGCTCTAGTCGTAAAGGTTAGGATCGATGAATTCGAGCTCG	GAGGATCGAGACTCATAGAT	tag_1071_st	CTCTAGTCGTAAAGGTTAGG	tag_11847_st	CGGCAATGACAAAAACTGAA	TTGAAATGAAGATGGTTTTCAGAC	AATCTCGTTGCAAAAGCTTGA	TGCGAAGAAGGTATGGGAAT	258	529	557	1156	951	2344
CUT015	2	+	326296	326776	237	3315	AAGAATTACCTAAACTATTAAAAGCGGACCCATCTAAAACATAACGATGTCCACGAGGTCTCTGAGTTCAGTAGAGTCGTTCGCGTACGCTGCAGGTCGAC	AGATCCCGAGTTCGAACCTCGGTTGGATCAAACTCTTTATTTTTTCGGTGTCGGTCTCGTAGGAGACTCACCCATCTGTAGGATCGATGAATTCGAGCTCG	GAGTTCAGTAGAGTCGTTCG	tag_11691_st	GAGACTCACCCATCTGTAGG	tag_11841_st	CACAGGGAATGGAAGAAAGG	GGCAATACGACCGAGTTTTC	CTCCCACAGATAGCGGAAGA	TTGATGGACGATAGTTGATTTCC	306	426	453	945	933	2030
CUT040	3	+	39049	39424	248	1300	TCCGAAACAGGACACTTAGCACACAAATACAGAATAGGAAAGTAAGATGTCCACGAGGTCTCTGATAGATGCTTAGCCCACTCCGTACGCTGCAGGTCGAC	CACACCGGACAGTACATGAAACTGGACATATTTGAGGAATTTCTTCGGTGTCGGTCTCGTAGGATACTATACCCCATGTAGGATCGATGAATTCGAGCTCG	GATAGATGCTTAGCCCACTC	tag_1168_st	GATACTATACCCCATGTAGG	tag_11839_st	TCAGCGGGGATACTCATTTT	TCCAAAGAAGGCTCTGAAATG	CGTGTAAGCTGGGGTGACTT	TTAGTTGGTAGCACTTTGATGAGG	583	561	656	979	998	2199
CUT058	4	+	421937	422529	423	981	GACCCTGAGGCTTTGCCAAGGATAGAAAGAATACCCCAGAGAAAAGATGTCCACGAGGTCTCTGCACCTCATAGATGGTTATCCGTACGCTGCAGGTCGAC	GCATATGCACCATGCAATTTCCACCTATTTAATTACACTTGCAGTCGGTGTCGGTCTCGTAGGCCAGTATTGCTAATCTAGGATCGATGAATTCGAGCTCG	GCACCTCATAGATGGTTATC	tag_1109_st	GCCAGTATTGCTAATCTAGG	tag_11830_st	CCCTGTTGTTTTGCCTCTTC	TTGAGCCTGCTTTCTTTGCT	AGCAAAGAAAGCAGGCTCAA	AGAAAGGCGCAGAGAAACCT	427	494	963	1203	1371	2356
CUT083	4	+	1153877	1154069	251	1859	ACACTTTTTGAAGCGGGATACAGAAAAAGAAGATATTTCCCATTTGATGTCCACGAGGTCTCTGCACTTACATGACTAGAGCGCGTACGCTGCAGGTCGAC	ATACGTTTTTAATATATACAAAATAATACAGTTTAATTTTCAAGTCGGTGTCGGTCTCGTAGTACAGCTATAGCGATCTAGGATCGATGAATTCGAGCTCG	GCACTTACATGACTAGAGCG	tag_1062_st	TACAGCTATAGCGATCTAGG	tag_11831_st	GACGGGCGATGAGTAAGAAA	GTGGGACGGAGACAAAGAAA	TCTTTGTCTCCGTCCCACTC	TGTGGGGTTTCTTGATTGGT	248	381	484	1060	715	2100
CUT084/SUT068	4	+	1157312	1159034	1384	2286	AGATTACAGG ACTTTTTTTT TTCTTACTGT ATTTTTCCGT AGAGTGATGTCCACGAGGTCTCTTAGCCGAGTCCCCTAAGTCTCGTACGCTGCAGGTCGAC	GGGTTAATGATATGAAAATGTTTTTATTTAATAAGAAATGATGTACGGTGTCGGTCTCGTAGAGGGTACTCCCACTCTTTCTATCGATGAATTCGAGCTCG	TAGCCGAGTCCCCTAAGTCT	tag_13926_st	AGGGTACTCCCACTCTTTCT	tag_13999_st	TCTTTCCACCACCCATAGGA	CCCATTTAATTCCACCTTCG	TTTGTTCCCATTTCTTTTCCA	GATGAGTGAGTAATCGCCAATG	297	712	290	1211	2832	2726
CUT095	4	+	1359157	1359485	255	438	CAAAATAGAACCTAGCCACTTCGCGTAAAAGCTCATAATGTTAACGATGTCCACGAGGTCTCTGCATATAGAGACGCATAAGGCGTACGCTGCAGGTCGAC	AGTAAGTGATGTGGATGCTATTTTAAAAAAGTTTTGGATATAATGCGGTGTCGGTCTCGTAGTAGGATAGTCACCCACACGGATCGATGAATTCGAGCTCG	GCATATAGAGACGCATAAGG	tag_11718_st	TAGGATAGTCACCCACACGG	tag_11857_st	TTTCTCCACCAAGTCATCCA	GCGGGTGATAAAGTTCGATG	AACTTTATCACCCGCAGCAT	GTCTCCGCAAGGAAACACC	356	614	510	828	852	2101
CUT103	5	+	9969	10497	2416	3223	GCATTTATCAGGATTTGTAACCTTGTTCTAAAGAGGCATCGTATAGATGTCCACGAGGTCTCTGCCCTAGTTTTACACGAAAGCGTACGCTGCAGGTCGAC	CCATCTTTATATAACCATTTCTTTCCACTATTAGCGAATACTTTCCGGTGTCGGTCTCGTAGTAGTCTAGTAGATCGGTAGGATCGATGAATTCGAGCTCG	GCCCTAGTTTTACACGAAAG	tag_10695_st	TAGTCTAGTAGATCGGTAGG	tag_11838_st	CGGCGTTATTCATTTTCGTC	AGGTCCACACCGTCATCAA	ACATTCTTGGAAACCCATCG	AGATGCCCAAAGCCAATAAA	436	691	728	1212	1513	2562
CUT123	6	+	261473	262257	6424	947	GTTGGTGATGTAATAGGATAATGAAACATATAAAACGGAAGTAAAGATGTCCACGAGGTCTCTGCCCTTTAATGAGACTGTAGCGTACGCTGCAGGTCGAC	GTACATAAAAACTTACACTAGCGTCAAGAATAACGTGCATTTAATCGGTGTCGGTCTCGTAGTCACTCTATCGAGGCGTAGGATCGATGAATTCGAGCTCG	GCCCTTTAATGAGACTGTAG	tag_11154_st	TCACTCTATCGAGGCGTAGG	tag_11836_st	GGAAGCATTGAAGTTGTTGGA	TTTTCGGTCGCTAAGTTTCC	TGCATGTTTTGCCCTGTATC	AACAAGGAATGAAGGCAACG	393	488	852	1176	1530	2323
CUT142	7	+	420907	421355	352	1737	GATGTATTTCGGCGTCTCTACAAGACCCAATAAAGTAATTCGGTGGATGTCCACGAGGTCTCTGCTAGTTTACGATAGGTTCGCGTACGCTGCAGGTCGAC	GTGTAGTTACATATCCAGATACCTGTCTTCTAGGTGAACAGTTGGCGGTGTCGGTCTCGTAGTCTCTAATGCCGCGTAACGGATCGATGAATTCGAGCTCG	GCTAGTTTACGATAGGTTCG	tag_11693_st	TCTCTAATGCCGCGTAACGG	tag_11854_st	CGGAGATGAATAGCGGAAAA	AGAAATGACTGCCTGGTGCT	TCCCTTCTTTGCCTCTTGTG	TAAACCTTGCCATGCTCTCC	747	793	914	1184	1507	2636
CUT150	7	+	609803	609931	2240	633	AAGATGATGTAAAAGTAGATTCGCATCTGAGAATGTTTTCTTCAAGATGTCCACGAGGTCTCTGCTCACGCATTCTATATTCGCGTACGCTGCAGGTCGAC	CTATCGGACCAAGGCCCAAACGGGTTTAAACGGCTGCCCTCCGCACGGTGTCGGTCTCGTAGTTACCCGAGAGGCTAGTAGGATCGATGAATTCGAGCTCG	GCTCACGCATTCTATATTCG	tag_11677_st	TTACCCGAGAGGCTAGTAGG	tag_11835_st	TCTCCTTTCATCCGTCTCGT	CCAAGGCCGAAAAGAAAAAT	ATTTTTCTTTTCGGCCTTGG	CTCTTCCTCGACGGTTTTGT	261	539	398	891	640	2089
CUT170	7	+	1065490	1065882	550	3109	ATATATATATATTCCATACATAGTATATAATATGAACTCGTTTGAGATGTCCACGAGGTCTCTGGACCTTCCTAAATCGTTCGCGTACGCTGCAGGTCGAC	CAGCAAGAGGCTCTAGGATGAAGTCTTCCCGGAAACCATTACTCCCGGTGTCGGTCTCGTAGTTCACCGCGACAGCTTTAGGATCGATGAATTCGAGCTCG	GGACCTTCCTAAATCGTTCG	tag_11689_st	TTCACCGCGACAGCTTTAGG	tag_11850_st	TCTAGCAGAGTGGCAAACGA	CTCTTGGGGTCCGTGAGAT	AGGTTCTCAGTTCCCAATCG	GTCAGCATTGTTCCCAAGGT	634	685	655	1156	1315	2500
CUT244	11	+	581180	581492	430	791	CAGCGGAAAAAATGCAGCAAAAGCAAAATACCCCATTCAAGTTCCGATGTCCACGAGGTCTCTGGATGTGATCAACACCACTCCGTACGCTGCAGGTCGAC	AGTCCCAGTCCATAAACTAGTAGAATGACAAAAAGAAACTCAGAACGGTGTCGGTCTCGTAGACCTTGACACCGGCGTAATGATCGATGAATTCGAGCTCG	GGATGTGATCAACACCACTC	tag_1112_st	ACCTTGACACCGGCGTAATG	tag_12219_st	TCGCAGGCTTGTTGTAGTTG	ATGCTTTTTGGGGTTTTTCC	GGAAAAACCCCAAAAAGCAT	AATGCAGGAAAAGCCTCAAC	608	808	550	937	1139	2404
CUT248	12	+	109241	109665	314	1910	AAGCTTTTAAGCTGTTGTTTTAAAAAAGGTTAAATGGGCGCTTTAGATGTCCACGAGGTCTCTGGTCACTGCATACGCATCAACGTACGCTGCAGGTCGAC	GCTATGAGCAGTCCGACAATTCGGAAACCATAGCTCGCCATAATTCGGTGTCGGTCTCGTAGACTTTACCAGCCCGGGAATGATCGATGAATTCGAGCTCG	GGTCACTGCATACGCATCAA	tag_1086_st	ACTTTACCAGCCCGGGAATG	tag_12207_st	TGCGTTTGCTTGTTTTCTTG	TCAAGTAGCACGCTCCCTCT	CATAACCGAACCATCCCAGA	CGTTTTTATGTAGCGAGTGAAGG	275	518	291	842	866	2019
CUT277	12	+	1028176	1028328	283	526	AGGGTACGGCCCAGAGTATGAATCGTTGGGGGATGAAATCACTTTGATGTCCACGAGGTCTCTGTACAGCATGACCTGAACTCCGTACGCTGCAGGTCGAC	AACTTTCAGATTAAGACAAGGAAGAAAGAAGGAAAAAAGGTAGGACGGTGTCGGTCTCGTAGAGGCTCAAGCACCCTGAATGATCGATGAATTCGAGCTCG	GTACAGCATGACCTGAACTC	tag_1110_st	AGGCTCAAGCACCCTGAATG	tag_12210_st	ATACACGCCTTCCATCTTCG	TGCTGAATGCTGTGATACTGG	CCAGTATCACAGCATTCAGCA	ATGTGTTTCACCGCCATTTT	423	594	202	777	605	2030
CUT296	13	+	370761	371209	244	8187	ACAATTCAATCCTACTTAATTAGCAATAACATACTAGCGGTAGAGGATGTCCACGAGGTCTCTGTAGATCAGAGCGCCTAACGCGTACGCTGCAGGTCGAC	TAACATACTTACTGCAGGGCGAAATTTTTCTCAAATTGTGCCTAACGGTGTCGGTCTCGTAGAGTCTTACATGCCGCTAATGATCGATGAATTCGAGCTCG	GTAGATCAGAGCGCCTAACG	tag_11209_st	AGTCTTACATGCCGCTAATG	tag_12216_st	AGTCCTCTTCCCCATCACCT	AGTCAGCGTCACCAAGGATT	ATCCTTGGTGACGCTGACTT	TATCTGGCATTGAGGGTGGT	772	823	386	787	1140	2269
CUT296/SUT301	13	+	370716	372038	200	7548	ACAATTCAAT CCTACTTAAT TAGCAATAAC ATACTAGCGG TAGAGGATGTCCACGAGGTCTCTCGGAGATACTATCACATCCTCGTACGCTGCAGGTCGAC	TTTCTTCTAAAAACCCCTTAAAGGTATTTCCAGAGAAAATATTATCGGTGTCGGTCTCGTAGTCTGAGAGGGGAGTCTTTCTATCGATGAATTCGAGCTCG	CGGAGATACTATCACATCCT	tag_13663_st	TCTGAGAGGGGAGTCTTTCT	tag_14000_st	TTTGCCTCGGTAGTTTTGTTG	AAAGTCTCTAGCAAAGGGAGAAAA	TTTTCTCCCTTTGCTAGAGACTTT	ACGTTGCCAGCATAAAACCT	446	850	390	1184	2432	2305
CUT332	13	+	348763	349187	242	569	GAGGCACTTCTTTGTGGAATGGTAGCCATTGTATTGAGATTTTTCGATGTCCACGAGGTCTCTTAGAGGGACTGCATACCACGCGTACGCTGCAGGTCGAC	TTGCGTTTGCGTCTCAAATTGAGTTTGTAGGTTACGTGTCGCCTTCGGTGTCGGTCTCGTAGCAAGCGCAGGAGACTTAATGATCGATGAATTCGAGCTCG	TAGAGGGACTGCATACCACG	tag_11236_st	CAAGCGCAGGAGACTTAATG	tag_12224_st	TACCGCTCTTGCTGTTTTCC	AAACAGCCGAGAAACGAAAA	TTTTCGTTTCTCGGCTGTTT	CCCAAGTGGAAAAGGACAAA	744	803	620	1036	1345	2498
CUT353/SUT758	14	-	763088	764069	496	1306	AAGGATAAAT CAAACTATAA ACTTATTGAA TTGTCAAACT ATCAAGATGTCCACGAGGTCTCTCCGCCTGTAGACAGATTTATCGTACGCTGCAGGTCGAC	TTGCACAATAGGTACGCTTGTCATTATGTAGATTCTCAATACTTGCGGTGTCGGTCTCGTAGGCGGGATTCACACCTCTTCTATCGATGAATTCGAGCTCG	CCGCCTGTAGACAGATTTAT	tag_13391_st	GCGGGATTCACACCTCTTCT	tag_13982_st	TGAAGTAACCAAAAATGTCTCGAA	AAAGACCCACGCTTTTGCTA	GGTGCCATCATTCACAAGC	GCCCAAACTCTCACTTCTGC	262	519	296	808	2091	2170
CUT356	15	+	128306	128498	386	739	TTTTCTATCTCTTGGCTTGCTATGTTTCAATGTCAGCCTTTGCTTGATGTCCACGAGGTCTCTTAGCCGATCAGATGGGTTCGCGTACGCTGCAGGTCGAC	TATGTTTCTCTAGGTGACAAGAAATAAAACTGGAGACAGGCGATTCGGTGTCGGTCTCGTAGCACACCAGCGTATTTGACTAATCGATGAATTCGAGCTCG	TAGCCGATCAGATGGGTTCG	tag_11695_st	CACACCAGCGTATTTGACTA	tag_1213_st	CTGTCCGAATTGTCCGAGTT	AAAATGGGCCTTCGTCAATA	TATTGACGAAGGCCCATTTT	ATTATCCTGGGCGGCTATTT	245	434	420	938	646	2031
CUT374	15	+	421914	422202	264	1530	CAAGATTATAAAATACATTGCAGTGCCTTAAAAACGTACTTCCGAGATGTCCACGAGGTCTCTTAGCGCCATGTCTTCACAGGCGTACGCTGCAGGTCGAC	ACATAAGGAAAATAAATTTATTTGAATCAATCAACAGACCTATCTCGGTGTCGGTCTCGTAGCACACGATGCGAAGTGACTAATCGATGAATTCGAGCTCG	TAGCGCCATGTCTTCACAGG	tag_11743_st	CACACGATGCGAAGTGACTA	tag_1212_st	GAGGAGCAACACCATCAACA	AGAGCAGGAGCGTTAGTTTACC	AACGCTCCTGCTCTCTTTCA	TTCCATTTTTGGGAACGAAC	855	879	181	774	1023	2312
CUT378	15	+	458186	458650	366	2626	TTATCGCCATGAGCCTTAGCTTATCAAGCCTCTCACAGACAATTAGATGTCCACGAGGTCTCTTAGGCACTCCACTAACGTAGCGTACGCTGCAGGTCGAC	GTTCTTTTGAGGAAAGCATGCATAGACTTGCTGTACGAACTTTATCGGTGTCGGTCTCGTAGCAGCAAGGGCTATTTATCGAATCGATGAATTCGAGCTCG	TAGGCACTCCACTAACGTAG	tag_11140_st	CAGCAAGGGCTATTTATCGA	tag_1207_st	GGTCGGTATTGGTGGTTGTT	CTGCCGTCATTCCTTAGTCC	CTAAGGAATGACGGCAGAGG	CTTTGCTGGTGGGAGAGAAA	628	640	481	907	1093	2206
CUT379	15	+	462634	463394	1358	1075	GCCGTTCAGTAGCTCAGATTGCCAGGGTTAAAAATTGCTCCTTGGGATGTCCACGAGGTCTCTTAGGCAGACGAATGCACATGCGTACGCTGCAGGTCGAC	CATCTTGCCAGATCTTCAAGAGAAATGTCACCAAATAAATTATGACGGTGTCGGTCTCGTAGCCGACGCAGTTTGTATAATGATCGATGAATTCGAGCTCG	TAGGCAGACGAATGCACATG	tag_1065_st	CCGACGCAGTTTGTATAATG	tag_12214_st	GTAGTGTCCGCCTTCATTCC	AAAATCAGCTCAACGGCAAG	TCGGATGGCACTACTTGATG	TGATAATTGGCTCTTACTCCAACC	587	480	219	789	1111	1928
CUT424	16	+	581523	581987	327	386	AAAGGGCGCTGAGAATCTATTAGAAATGCCATTAAGTGCTTTGAAGATGTCCACGAGGTCTCTTATACCTACGCGACGACAGGCGTACGCTGCAGGTCGAC	CTTTATCTAACGAATATTTGGAAGGTGAACCTAACGATAAAATACCGGTGTCGGTCTCGTAGCCGTGGATCATATCAGTCAAATCGATGAATTCGAGCTCG	TATACCTACGCGACGACAGG	tag_11745_st	CCGTGGATCATATCAGTCAA	tag_12_st	TCCGCTGTTGGATATTTCGT	AACGGCTTCTTTGTAGTCATCC	TCGAGAAGGCAACAATCAAA	CCGTTATTTCTCGCTGTTGG	840	890	663	1150	1586	2699
CUT436	1	-	10733	11141	1717	810	CAAATACACCTAAAAACATAAAGTTTGTAAATGCCAAGAAAAATAGATGTCCACGAGGTCTCTTATACTAGAGCCCCTGAAGGCGTACGCTGCAGGTCGAC	GTTGAAAGCAGTAATTTGTGACGTCCGTTTTTGGCACAAGTAAAACGGTGTCGGTCTCGTAGCCTTATCTAGCGAGGTAATGATCGATGAATTCGAGCTCG	TATACTAGAGCCCCTGAAGG	tag_11714_st	CCTTATCTAGCGAGGTAATG	tag_12220_st	AACGCACGGCATCATCTTAT	TCCATGTAGAAATGACCTGCAA	TGCATACATTAGGCGTTTGG	TCAGACTCACCCCAAAAACC	655	721	311	819	1030	2199
CUT441	1	-	151619	152035	453	222	TAAAAGGTAACTAATGTAGACAAAAAAGTATACATTTAGCTTTTCGATGTCCACGAGGTCTCTTATCATTGCGCACAGGTTCGCGTACGCTGCAGGTCGAC	AGCAGTCAAAGTATTTTAATTTTCGGAGCTTTCATTTCAAGCGCCCGGTGTCGGTCTCGTAGCGGATGTATATATCGCTCGAATCGATGAATTCGAGCTCG	TATCATTGCGCACAGGTTCG	tag_11692_st	CGGATGTATATATCGCTCGA	tag_1210_st	ATGTCGTTTCTGGCTTCACC	TTAAGCACTAGGCGGTGGAC	GCAGCAGACGAAAGGTGTTT	GAGCCGAAAAGGAGAATGAG	889	823	801	1175	1496	2657
CUT442	1	-	199979	200419	7360	2984	TATGCTGTTATTCAATATTGTATATAACTTTTCATCAAGTAGTACGATGTCCACGAGGTCTCTTATGCCAGGTCCCATTCGTGCGTACGCTGCAGGTCGAC	TTCTTCATATTCTGTTATTAAATTTTTAGACTTTAATTTTTACTTCGGTGTCGGTCTCGTAGCTATACTCAGCGCCGGAATGATCGATGAATTCGAGCTCG	TATGCCAGGTCCCATTCGTG	tag_1068_st	CTATACTCAGCGCCGGAATG	tag_12206_st	CAATCTTCCGCTCAACATCA	GACACGTAACTCTAGGCCATACC	CCAGGTATGGCCTAGAGTTACG	AATGTTTTACCGCCCCAATC	366	370	732	1181	1073	2210
CUT458	2	-	720644	721180	1611	210	ACCATGTAATGAAATATATGGGATACATAAATGTATGGGATACATGATGTCCACGAGGTCTCTTATGTGACCAACCCTCAAGGCGTACGCTGCAGGTCGAC	TTATGAATGTTCGGTACCTCAGAACAACGCCTCTATTTTATCCTTCGGTGTCGGTCTCGTAGGACAGCTATTCTAATCACGGATCGATGAATTCGAGCTCG	TATGTGACCAACCCTCAAGG	tag_11703_st	GACAGCTATTCTAATCACGG	tag_11864_st	CTTCGCCTGGTAATGGTTGT	ATACATAAGCACCGCCCACT	GTGGGCGGTGCTTATGTATT	CGATTCCGACAAGACCATTT	819	813	654	1024	1455	2496
CUT461	3	-	29909	30405	1980	1044	ATTTACACTTATTATAAATTTTCTGTCATCTCGACTTAGTACACCGATGTCCACGAGGTCTCTTATTGGACACCGCCCTAAGGCGTACGCTGCAGGTCGAC	TCCAAAGATTTGTATTGTCCAGTGACATAATTTTCACTAAAACATCGGTGTCGGTCTCGTAGGACGGTAGACACATAGAATGATCGATGAATTCGAGCTCG	TATTGGACACCGCCCTAAGG	tag_11725_st	GACGGTAGACACATAGAATG	tag_12202_st	CGCGCCTTTTTCTTTATTTG	TGATTCCTTCGTGCAAACAG	TGTTTGCACGAAGGAATCAA	CTAGGGACGGTTTCCAAAGA	414	546	406	678	802	1883
CUT462	3	-	30845	31189	2916	260	ATAACGTAAGGTGAAAAATGTTTAAACTCAATAGTGTGAGGTTTAGATGTCCACGAGGTCTCTTATTTCCCACCGCGTCAAGGCGTACGCTGCAGGTCGAC	ACTTATAAAATGAATATTTCAATTGATGAATAGCTATATATTGGACGGTGTCGGTCTCGTAGGACTCCCACTACTTGTAATGATCGATGAATTCGAGCTCG	TATTTCCCACCGCGTCAAGG	tag_11705_st	GACTCCCACTACTTGTAATG	tag_12223_st	AGGAGCAGCACACAGATCAA	AGGTGGGAGGGATAATTTGG	TCCCACCTGCTTGCTACTCT	TCGAAGAAACACAGAACACAGAA	483	727	645	968	1121	2354
CUT468	4	-	21869	22453	1234	370	GATATACTCGCCAAGATCGATTTCTTGAAGTAAATACTTTGTGGGGATGTCCACGAGGTCTCTTCAGAGCACTCTCACTAAGGCGTACGCTGCAGGTCGAC	TGCTCAGAAAATTGGACCATGGTGTCATCTAACTTTAGTTGGTCCCGGTGTCGGTCTCGTAGGAGATCGCAAGATAGCTCGAATCGATGAATTCGAGCTCG	TCAGAGCACTCTCACTAAGG	tag_11724_st	GAGATCGCAAGATAGCTCGA	tag_1209_st	GCTCACCTCCGGTACTTGTT	AGAAGCGATAGGCACCTCAA	TGCCTATCGCTTCTTCTCGT	TCTTCTTGGCTTTTGTGAGATG	627	665	517	800	1131	2124
CUT474	4	-	132317	132645	484	792	ATTTTGTAAAAGAGAGCACGTCTGTAGTTTCAAACAAAATCACCAGATGTCCACGAGGTCTCTTCCATGACGCCCTTGTAAGGCGTACGCTGCAGGTCGAC	AAATGGTTGAGGGCCGAATAAACGAAAAATTATTAGACCATAATTCGGTGTCGGTCTCGTAGGATACGATACCATGCCACGGATCGATGAATTCGAGCTCG	TCCATGACGCCCTTGTAAGG	tag_11735_st	GATACGATACCATGCCACGG	tag_11861_st	CCCACGCTTAAACTTCCTTG	GGTTAGCCGCCCATATAAAAA	TATATGGGCGGCTAACCTTG	ACAATGCCCGATGCTTACTC	535	594	425	940	944	2193
CUT523	4	-	1166153	1166433	1493	2226	AAAGCGTCTCAAAACACGGAGAAATGCACTAACAATGGGTATACTGATGTCCACGAGGTCTCTTCGATCTGCAAACAGTCTTCCGTACGCTGCAGGTCGAC	ACTTGTCGAAATTCAATTCTGTTGCTTTCATTTTTCTGTAGAGAACGGTGTCGGTCTCGTAGGATAGATCGACGCCCACATGATCGATGAATTCGAGCTCG	TCGATCTGCAAACAGTCTTC	tag_10622_st	GATAGATCGACGCCCACATG	tag_12227_st	GCAAAGTCGGAAAATGGAAA	TGAGAGCCATTGATTTTTGCT	GCAGTATGCTTTCATGCCTCT	AGGCACCACATTTCTTCAGG	458	534	507	1026	922	2219
CUT541/542/SUT503	5	-	15304	16026	1584	329	TGTTGTGCTTTCTTGACAATTATGTTCCTATAGGAAGCATCTTAGGATGTCCACGAGGTCTCTGACAACAGGGACGCATTTATCGTACGCTGCAGGTCGAC	TCTGTCAGCA CAGAACGTAA CGACTTTTCC TTATATCCAC TATTGCGGTGTCGGTCTCGTAGGGTAGGCTCCCTCATCTTCTATCGATGAATTCGAGCTCG	GACAACAGGGACGCATTTAT	tag_13390_st	GGTAGGCTCCCTCATCTTCT	tag_13978_st	TGACTTAGATTTGGCGGTCA	CAGTATCGTTCGTCCCGACT	GCTACTAAAATGCGTCTTTCCTG	CCGCTGTTGTCAAACAAGACT	272	783	316	881	1832	1995
CUT547	5	-	152173	152661	1195	859	TCCGACCACGATTATAGAGTCATCTACCATACACCATTATTATACGATGTCCACGAGGTCTCTTGCATCAACTACTGCTAAGGCGTACGCTGCAGGTCGAC	AAAACTAAACGTAGTATAAAGTCTTGTTTAGTGCAAGCCACTGTTCGGTGTCGGTCTCGTAGGCCGGAACTATATCAGCGCAATCGATGAATTCGAGCTCG	TGCATCAACTACTGCTAAGG	tag_11728_st	GCCGGAACTATATCAGCGCA	tag_1205_st	CGCACTTTCCACCATTTTTC	TGGACGAACAACGAAAGAGA	TTTATGTGCGGCTTTGTCAG	CCTACCATCAAGCCCATTCA	588	783	485	980	1333	2422
CUT572	5	-	567037	567581	807	2326	TTGGCGACAGGATATAGTTCTCTTTAAAACATACGAACGAAATTAGATGTCCACGAGGTCTCTTGGCACAGAATCGGCCTCAACGTACGCTGCAGGTCGAC	AAAACACACACCACACCACATACGCGCTGATTGGTTTTATGGAAGCGGTGTCGGTCTCGTAGGCGTCCACTAAACCTTAATGATCGATGAATTCGAGCTCG	TGGCACAGAATCGGCCTCAA	tag_11_st	GCGTCCACTAAACCTTAATG	tag_12225_st	TTTGGGAATGTGTCGTGAGA	AGGCTCATTTTTCCCACTGA	TGCCAAAGGACATCGTTAAAA	AGGACACGAAAAACGGTGAG	257	525	958	1169	1320	2353
CUT575	6	-	118637	119165	2492	264	AACATCTAACGATAAAGATTGTGTCATAAAAACACTCATTATTTAGATGTCCACGAGGTCTCTTTAGAGACCTCGACCACACGCGTACGCTGCAGGTCGAC	ATAAACTGCAGCTAAACTGCTTGTATGTTCAATTTTAATTGTGTTCGGTGTCGGTCTCGTAGGGACTCCATCACTTCTAATGATCGATGAATTCGAGCTCG	TTAGAGACCTCGACCACACG	tag_11225_st	GGACTCCATCACTTCTAATG	tag_12217_st	TCTCCTTGTGCCTGCTTTTT	CGTGGGCAGAAGAAATACAAA	ATTACGCATTTTTCCAGCTTTT	ACTCCTCGTCGTCGTCTTTG	380	556	374	844	1010	2059
CUT645	8	-	238205	238869	1201	229	TATAAACGAAAAGTTTCCGCAGATATCAAATCTAGAAAAGATGCTGATGTCCACGAGGTCTCTTTGACGCTGAGAGGTCTTCGCGTACGCTGCAGGTCGAC	ATGACAGAATTTTAAGAATTATCTAAATACCCATTCATCTTTCATCGGTGTCGGTCTCGTAGGGCTCACCTTTCCTATAATGATCGATGAATTCGAGCTCG	TTGACGCTGAGAGGTCTTCG	tag_11685_st	GGCTCACCTTTCCTATAATG	tag_12213_st	GCATCGAAGGCTGAAAAATC	GCTGGCGTTTAATTTGGTGT	TAAACGCCAGCGCCTATAAC	TCACCAAACCCAATGAAAGC	796	752	524	812	1310	2223
CUT666	9	-	342013	342293	2669	243	GAACTTGGGAAGGAACATAATCCGGTATGTGAAATCAATTGAATCGATGTCCACGAGGTCTCTTTGAGTACAGACCGATAAGGCGTACGCTGCAGGTCGAC	ATCAATATAATAAGAATAACGCTTATGGTTTATTTTAGCTTTTTTCGGTGTCGGTCTCGTAGGTAGACATCCTACCTGACTAATCGATGAATTCGAGCTCG	TTGAGTACAGACCGATAAGG	tag_11720_st	GTAGACATCCTACCTGACTA	tag_1211_st	CGTTTACCATCCCGATTTTG	CAAGGTTTTAGTGGCGTACCA	TGGTACGCCACTAAAACCTTG	TTGTTTCTGCTTGGCTTTCA	370	549	331	770	681	1978
CUT672	10	-	96757	97501	228	236	GCTGAGATAACAAGAAGATGTTCTGAGCATTGAGCATTTAGGATAGATGTCCACGAGGTCTCTTTTAGCGAGCGACGGATTCGCGTACGCTGCAGGTCGAC	GATGCTTCTCAGCAGTGGCCCATTACGTTAGTCAACGACTGTTGGCGGTGTCGGTCTCGTAGTAACGCCAGGACCCGTAATGATCGATGAATTCGAGCTCG	TTTAGCGAGCGACGGATTCG	tag_11675_st	TAACGCCAGGACCCGTAATG	tag_12218_st	CCGAAGTGAGGAAGAAGGTG	GACGCTTTTTGCAGGCTACT	AGGCATCCATCCATGTTTGT	TGGGTTGTGATTTGATTTGC	430	647	322	942	1415	2248
CUT764	13	-	286669	287229	1569	850	TAATATTTCTTTTTCTGTGCCTTAACTGACCTGTCAACTAGAATTGATGTCCACGAGGTCTCTTTTCACATAGGACTCGTTCGCGTACGCTGCAGGTCGAC	ATTCATTCCTGGTTTGCAGGCATGAAAAGATTAATATTGTCATTGCGGTGTCGGTCTCGTAGTACCTAGACCCATTTCCATGATCGATGAATTCGAGCTCG	TTTCACATAGGACTCGTTCG	tag_11690_st	TACCTAGACCCATTTCCATG	tag_12241_st	TGGGAGGAGAAGAAGTCGTG	AGGGGTATTCGTATCGCTTG	GCGATACGAATACCCCTCAA	GGGTAAATCTCAGGCACAGG	770	618	512	1006	1266	2283
CUT775/SUT307	13	+	511801	512238	486	1355	CAACTCATTA GATTAATCGA GTGGTGGTAA GGCTTTTTTT GCTCGGATGTCCACGAGGTCTCTTGAGGGACTCATCCGCAACTCGTACGCTGCAGGTCGAC	TACATCGGGAAGCCCCTTTACTCAGAAGCCCGTTAGTTTCTTGAGCGGTGTCGGTCTCGTAGCTAGGGATACAGACGTTTCTATCGATGAATTCGAGCTCG	TGAGGGACTCATCCGCAACT	tag_13400_st	CTAGGGATACAGACGTTTCT	tag_14002_st	CAAAGGGAACGATTGATTAACAG	CTGTCACGTGCTCGCATT	ATGAACCTGGAGCTCGCATA	CCCACAATTGAGGTTGCATT	250	810	293	955	1547	2398
CUT782	13	-	649469	649813	2351	223	AACGTACTAAGCTCAATTTGTCCACAGTATAATCAACAAAATTGCGATGTCCACGAGGTCTCTTTTGGATGCAGCCTCACAGGCGTACGCTGCAGGTCGAC	AGGTTAGGGAAGCCGGATAAAGAAAATAGAGTACTTTAAAACTGTCGGTGTCGGTCTCGTAGTATAGGGTTCGCATCCACGGATCGATGAATTCGAGCTCG	TTTGGATGCAGCCTCACAGG	tag_11742_st	TATAGGGTTCGCATCCACGG	tag_11862_st	CCACTTCTTCCTCGTTTTGG	GCAGAAATAATGAACCACAATCG	CGATTGTGGTTCATTATTTCTGC	ATCAGCTACTGCTCCCCTTG	761	807	290	796	1029	2262
CUT816	14	-	525560	525824	6715	262	GAACGAATCAATATATTGCACTACAATATATCACAAAGAGTGGCCGATGTCCACGAGGTCTCTAAATTCACAGGGCGAGCAGGCGTACGCTGCAGGTCGAC	AAATTCATTCCAATCTTGGATAATATATATGTATATATCTATACACGGTGTCGGTCTCGTAGTATCACCATCCCCTGGAATGATCGATGAATTCGAGCTCG	AAATTCACAGGGCGAGCAGG	tag_11760_st	TATCACCATCCCCTGGAATG	tag_12209_st	GCGGAGAGGTAGATGTGGAG	CCGTCCTCAGACAGACACAA	TGGACTGCAATGTGTATCTCG	CGAACGAAGACACACAGTCC	506	700	496	1004	1050	2363
CUT827	14	-	167502	167862	1788	865	ACTGAAAAAATAATAGATTTGCTAGAAATATGTCACATAAAAAGCGATGTCCACGAGGTCTCTAATGAGCACTCCCTACCAGGCGTACGCTGCAGGTCGAC	AGTGTTAATTCACCATTTCGAACACACCCTCTCATATTGCAGTACCGGTGTCGGTCTCGTAGTTCATTGGACCCAGTCACGGATCGATGAATTCGAGCTCG	AATGAGCACTCCCTACCAGG	tag_11753_st	TTCATTGGACCCAGTCACGG	tag_11865_st	TGCCCAACATTTACAGAGGTC	AATCTCTGGCTCTCCCCATT	GAATGGGGAGAGCCAGAGAT	GCCGTTGGAGTTTTCTTCAC	854	827	162	727	996	2213
ncRNA NME1	14	+	585587	585926	296	894	GTGGTCTTCACCTGTTTTCTAATTTCTTCTCGTTTAAAGTTCTTCGATGTCCACGAGGTCTCTAGTAGGCCCTGCAGTCTTATCGTACGCTGCAGGTCGAC	TGCTAAAAAGTAGTGTAAACAACAAACTGTTAAAAAAATAAAAAGCGGTGTCGGTCTCGTAGATTGGCGATCAGTCCAGCCTATCGATGAATTCGAGCTCG	AGTAGGCCCTGCAGTCTTAT	tag_13376_st	ATTGGCGATCAGTCCAGCCT	tag_13640_st	CAATATGAGTGCTAACAAGGTTGC	TGACGATTCTTTGGTCATGG	GATTGCTCTTTCCCGTGCT	GCTTGACTCTGTTGCATTGG	394	606	268	806	764	2070
ncRNA RPR1	5	-	117667	118035	456	2264	TGGTGCTCGCGGCTGGGAACGAAACTCTGGGAGCTGCGATTGGCAGATGTCCACGAGGTCTCTGAGTTCTCGAAATAGCCTCTCGTACGCTGCAGGTCGAC	AAGTGAAAATTAAAAAAGAAAGATTAAATTGGAAGTTGGATATGGCGGTGTCGGTCTCGTAGAGGCCACGTCAGCCAGTTATATCGATGAATTCGAGCTCG	GAGTTCTCGAAATAGCCTCT	tag_13904_st	AGGCCACGTCAGCCAGTTAT	tag_13377_st	TTCACTTACGCTACCTTTTAACCTG	GACATTAACCCGGAGGACAA	ACCTATGGGCGGGTTATCA	GGTATCGGGTTCGCCACTA	364	512	473	765	757	1935
ncRNA RUF21	6	-	57815	58521	1479	261	CAATATCTTCACGGAGAGGCTAAAATCAACGTCGTTATTCTTAAAGATGTCCACGAGGTCTCTCTAGACGGTAAGGCAGTTATCGTACGCTGCAGGTCGAC	GCAAAATAAACAAAAATCAAAAAAACTAATTAAATATCTTTAAAACGGTGTCGGTCTCGTAGCTAGAAGCATGATTGCCTCTATCGATGAATTCGAGCTCG	CTAGACGGTAAGGCAGTTAT	tag_13378_st	CTAGAAGCATGATTGCCTCT	tag_13906_st	CGGAGAGGCTAAAATCAACG	CAATACGCTGCTTCAGTCCTT	TTTGGAAGCAGCAGTCCTTT	TTGAAGCACTTGGAGCAAAA	271	315	363	674	800	1647
ncRNA TLC1	2	+	307587	308887	632	1426	AAAAGACCTTCTTTGTAGCTTTTAGTGTGATTTTTCTGGTTTGAGGATGTCCACGAGGTCTCTTAGGGAGCCCCCCATCTTATCGTACGCTGCAGGTCGAC	TATTGTATATTCTAAAAAAGAAGAAGCCATTTGGTGGGCTTTATTACGGTGTCGGTCTCGTAGGAGCGGTCACAATTACCTCTATCGATGAATTCGAGCTCG	TAGGGAGCCCCCCATCTTAT	tag_13374_st	GAGCGGTCACAATTACCTCT	tag_13902_st	ACGGGCAGCCAAAAATACT	CGATTAAGCAAACGCAACAG	AAGAAAAAGGAAAAAGAACGTCAG	CCGCAAACCTAACCGATG	427	657	825	706	1776	2021
SNR10	7	+	345985	346231	832	673	TTTATTTACTTTCCATTTCTTATTTTAGTGTTATTTTATAACAGTGATGTCCACGAGGTCTCTGAGAGCGACTACTACTGAATCGTACGCTGCAGGTCGAC	TGCCGAGAAGTTACTCGTGCAATTCACTACGATAATGATGTATATCGGTGTCGGTCTCGTAGTACTATTGCGCAGGCAGCATATCGATGAATTCGAGCTCG	GAGAGCGACTACTACTGAAT	tag_12802_st	TACTATTGCGCAGGCAGCAT	tag_12957_st	ACAACTTTAGCACGCCCAAC	CCACATTCTTCATGGGTCAA	TGACCCATGAAGAATGTGGA	AAGGGTGAAAAAGGGTTTGG	396	605	718	1165	1096	2429
SNR11	13	+	652275	652547	1130	340	TAAAAAATCTTTTCTTTTCCTTTTTTTGGTTTTTTGAAAAAGGGTGATGTCCACGAGGTCTCTGAGAGTCCGAACCCACTTTGCGTACGCTGCAGGTCGAC	TTCTTTCTACGTATGTATGAACTAGCAATTGAAAAAAAAAAAAAGCGGTGTCGGTCTCGTAGTACTCCTCCAAGATAGGCATATCGATGAATTCGAGCTCG	GAGAGTCCGAACCCACTTTG	tag_12687_st	TACTCCTCCAAGATAGGCAT	tag_12981_st	GAAAGGTCGCCAAGAAGAGA	ATACGTCCACCGCCTAAAAA	TTTTTAGGCGGTGGACGTAT	CGCCATCCAAGGTTTGTAAT	549	756	512	947	1042	2362
SNR128	10	-	139565	139691	2186	746	AAATGTGGGTAATTTGAGGAGACAGATAATATATATAATTTATGAGATGTCCACGAGGTCTCTATCATTCAGTCCAGGAGATGCGTACGCTGCAGGTCGAC	GTAAGCTGGTTTGATAAAGTAAACACAAGATACTACAGTATACGACGGTGTCGGTCTCGTAGGGCACGCATCTATACTACTAATCGATGAATTCGAGCTCG	ATCATTCAGTCCAGGAGATG	tag_12268_st	GGCACGCATCTATACTACTA	tag_1271_st	ACACGCTGCCCTAAGAAAAA	CTACCGTGGAAACTGCGAAT	CCTTAACATTCGCAGTTTCCA	TGGAGAACGACAGCAACAAC	619	868	366	884	959	2411
SNR128/SNR190	10	-	139564	139951	2185	486	GAGAAATTTCATGACACTTTTTTAAACAGAAAAGAAGAATTGATTGATGTCCACGAGGTCTCTATGCTCCAGAACCCGGTATGCGTACGCTGCAGGTCGAC	GTAAGCTGGTTTGATAAAGTAAACACAAGATACTACAGTATACGACGGTGTCGGTCTCGTAGGGCGTACCGAACTTCCGAATATCGATGAATTCGAGCTCG	ATGCTCCAGAACCCGGTATG	tag_12313_st	GGCGTACCGAACTTCCGAAT	tag_12787_st	ACACGCTGCCCTAAGAAAAA	GCAAGAAAAGTTCCCGTTTG	GCAAACGGGAACTTTTCTTG	TGGAGAACGACAGCAACAAC	470	609	509	884	959	2152
SNR13	4	+	1402918	1403043	1148	279	CAAATCGTCTCTATATCTTTTGTTAATTGGATTTTTTAAAGGGTCGATGTCCACGAGGTCTCTATCGAGAGGTACCGTAACTGCGTACGCTGCAGGTCGAC	ACAATGTAAGAAGGATTACTAAGATTTTCTACGGGGAAGTTAAAACGGTGTCGGTCTCGTAGATCACTGCGGATGAAGGCATATCGATGAATTCGAGCTCG	ATCGAGAGGTACCGTAACTG	tag_12327_st	ATCACTGCGGATGAAGGCAT	tag_12977_st	TGCCAACCAGATACACCTTG	AAAAGCCAAACAGCAACTCG	CGAGTTGCTGTTTGGCTTTT	CCTGTCTTTCTGTCGCTTCC	589	821	320	864	890	2344
SNR17A	15	+	780106	780597	1551	309	CATCTTTTCTCTTATGTTTTCTTCTTGTTTCTACTTAAAATCTGTGATGTCCACGAGGTCTCTATAGAGAGTGGATCAGACTGCGTACGCTGCAGGTCGAC	CAAACCTTTGGTTTTAAACAATTTAGAAAAGGAAAAAAGTGGTTACGGTGTCGGTCTCGTAGATACGAGGCTGATGCGTCATATCGATGAATTCGAGCTCG	ATAGAGAGTGGATCAGACTG	tag_12342_st	ATACGAGGCTGATGCGTCAT	tag_13030_st	TGGGCTGATTGTATGGGTTT	GCCTGCTCCGAAATGAAA	ATTTTGCTTTGCCGTTGC	GCATCCGTCGCTCTTGAC	363	546	312	789	906	1994
SNR17B	16	-	281055	281518	575	604	TTTTCTTAGTTTTATTCTCTTCTTGTTCTTTTTACTAAAAAAATTGATGTCCACGAGGTCTCTACAGTAGGCAGGATGTCATGCGTACGCTGCAGGTCGAC	ACCTTTGATTCGAAAATATTTTGGAAAAAATAAATGATTTGATTGCGGTGTCGGTCTCGTAGGCGAGACTAGGCTATCATTGATCGATGAATTCGAGCTCG	ACAGTAGGCAGGATGTCATG	tag_12260_st	GCGAGACTAGGCTATCATTG	tag_12580_st	AAACGGGAGGCAAAGGTATC	ATCGCAACAAATTCCAAAGG	CCCCAGAGTGAGGAAATGAA	AGACGCGAGTGATTGTGATG	850	779	821	1214	1536	2652
SNR189	3	-	178609	178799	389	721	TCACTGTGACCGTTGTTTTTTCAACTGTGAACTTATAAGAAAATTGATGTCCACGAGGTCTCTATACTACGAGCTCTGGGAATCGTACGCTGCAGGTCGAC	CAAGTATGAACAAGAACGATAATCAGTGAGTAACAAGAATAGAGACGGTGTCGGTCTCGTAGATACCGTCATCCGCTATCATATCGATGAATTCGAGCTCG	ATACTACGAGCTCTGGGAAT	tag_12797_st	ATACCGTCATCCGCTATCAT	tag_13018_st	CCTTATCAATGGGCTGAAGAA	TGAAAGTCACAAATCCCCTACA	CGGTATTATTGTAGGGGATTTGTG	GCGGGTTCTTGTGGTTTCT	414	655	550	1009	934	2323
SNR190	10	-	139760	139951	2381	486	GAGAAATTTCATGACACTTTTTTAAACAGAAAAGAAGAATTGATTGATGTCCACGAGGTCTCTAGAGGGTCTCGACCATCATGCGTACGCTGCAGGTCGAC	CTCCTCAAATTACCCACATTTGATAATCTCATGAGAAAAAATAAACGGTGTCGGTCTCGTAGGGATACCGATAGAGACATTGATCGATGAATTCGAGCTCG	AGAGGGTCTCGACCATCATG	tag_12255_st	GGATACCGATAGAGACATTG	tag_12570_st	ACACGCTGCCCTAAGAAAAA	GCAAGAAAAGTTCCCGTTTG	GCAAACGGGAACTTTTCTTG	TGGAGAACGACAGCAACAAC	470	609	509	1079	959	2347
SNR3	10	+	663748	663942	689	1077	CTTATTTGTTAATTCTATTTTTGAAGTTTCCTTCCGAAAAAAAGTGATGTCCACGAGGTCTCTGACCGGACGAATAGGTAAATCGTACGCTGCAGGTCGAC	AGTACAAGTTCAAAAATAAAACATAACTAAAAAAAAAAAGAAAAACGGTGTCGGTCTCGTAGGGTAGCATACCTCTTCACATATCGATGAATTCGAGCTCG	GACCGGACGAATAGGTAAAT	tag_12730_st	GGTAGCATACCTCTTCACAT	tag_12877_st	CGTCTGTGCGTATTTTCGTG	ACCCGGAAATTGATCTCTCC	AGAGATCAATTTCCGGGTCA	GAGTGTCTGGCCGAATGTCT	615	798	390	915	988	2372
SNR30	7	+	198784	199389	699	1926	TTTTCCCATTCAAGTTTCTCTTTGCTTATTTGTAAAAAAAAAAGTGATGTCCACGAGGTCTCTGAGCTATACGCATATGACTGCGTACGCTGCAGGTCGAC	CCTCTTCTGCGAGAGGACAAGATGTGAATATGTGAATTATAGAGACGGTGTCGGTCTCGTAGTAGACCGGGACCTGACTCATATCGATGAATTCGAGCTCG	GAGCTATACGCATATGACTG	tag_12346_st	TAGACCGGGACCTGACTCAT	tag_13022_st	GCAAGGCGACAAGGTAAATG	ATGAATACGTGAGGCCCATT	TCGGTCATCTTTGTTGTTCG	AGAATAGAAGGCCCGGAAAA	764	891	535	1056	1634	2606
SNR31	15	-	841958	842182	625	635	TTTCTGCCCATTTTTACTTCTATTTCCATTTGAATTCAGAAAAGTGATGTCCACGAGGTCTCTACTAGACGATCTGCGAGAATCGTACGCTGCAGGTCGAC	GTTACTTTCCAGATTGAAAATATACAACGTGGTTACATAAAGAAACGGTGTCGGTCTCGTAGTTGTTACCGACACCCTGGTGATCGATGAATTCGAGCTCG	ACTAGACGATCTGCGAGAAT	tag_12774_st	TTGTTACCGACACCCTGGTG	tag_12526_st	ACAACCCAACCCCAAAAACT	AAAAGGCGAGGTGAAAGAGA	TCTCTTTCACCTCGCCTTTT	TGTTGGTCATTTCGGTCGTA	711	827	541	1100	1233	2586
SNR32	8	+	381540	381727	968	1024	TTTTGTTATAATCAAATTCCTTTTGGTTTTTGTTTTAAAAAGGCCGATGTCCACGAGGTCTCTGATCACCCGTAACACGAGTGCGTACGCTGCAGGTCGAC	TAAAGTACGTTACTAAGAACCAGTAAAAATAAATATGTATAAATACGGTGTCGGTCTCGTAGTAGACTGGCAGCCGGATCATATCGATGAATTCGAGCTCG	GATCACCCGTAACACGAGTG	tag_12458_st	TAGACTGGCAGCCGGATCAT	tag_13014_st	GAAGTCGGCAAAGAAAGGTG	CGTGGGCTTTTAGTCATTCC	GCTGTGTTTTAGTGCGAACG	CGTCCCAAAGACCAGAAAGA	357	576	521	1196	1041	2431
SNR33	3	-	142364	142546	194	1088	TTCTACTCTCTTTCACATTTTTTTTTTCATAAGAATTAAAAAAATGATGTCCACGAGGTCTCTACTCGGACGTCACTCGATTGCGTACGCTGCAGGTCGAC	AAACAAGCTCAGTAGTAATACATAAAATAAAAAGTTTTGCAAATCCGGTGTCGGTCTCGTAGAACGGCCACTCCTATATCATATCGATGAATTCGAGCTCG	ACTCGGACGTCACTCGATTG	tag_12590_st	AACGGCCACTCCTATATCAT	tag_13017_st	AGGAAGCTGAAGTGCAAGGA	AAACGAAGGAACCGACTCAA	TGAGTCGGTTCCTTCGTTTT	CTCCACTGTTCGCTTCTGGT	565	717	245	811	792	2187
SNR34	7	+	899180	899382	1022	3278	TTGAGTATATTTACCACATTTTTTCTGATTTTTTTTTAAGAGGGTGATGTCCACGAGGTCTCTGATGGCACCTTCTCACATTGCGTACGCTGCAGGTCGAC	CTTCAAGACTTTTTACCTGCAAGAGACAGTACGTAAATATATGAGCGGTGTCGGTCTCGTAGTATCCCGGACCAGTTCGCATATCGATGAATTCGAGCTCG	GATGGCACCTTCTCACATTG	tag_12569_st	TATCCCGGACCAGTTCGCAT	tag_12976_st	TCGTGTTTGTTCTTCCCACA	GCCTCGTTTGAGACAACACA	GAGGCGATAGAATTGGGATG	CAAGAATATGGCCGAGGAAA	635	764	599	1182	1230	2605
SNR35	15	-	759326	759529	996	253	TTCTTGTATATTTACTCTTTTTATTTCAAATTTTAAAAAAAAACCGATGTCCACGAGGTCTCTACTCTTAGGGTCGACGATTGCGTACGCTGCAGGTCGAC	CCTCTTCAATCTTAACTACGTTATTTCTACGTCAAAATAAGAATACGGTGTCGGTCTCGTAGAAGCTAGGATGGGAGACCATATCGATGAATTCGAGCTCG	ACTCTTAGGGTCGACGATTG	tag_12586_st	AAGCTAGGATGGGAGACCAT	tag_12909_st	TCAACTCCGGGTAATGGAGA	CCGATGGACTTGACGCTTAT	CTATGCAAGGGCTGGTAGGA	AAACGCTCTTTGGAATGGTG	240	445	479	1072	802	2176
SNR36	15	-	680685	680866	1328	1240	GTATAATATATTGGGAGAGATAGTTCAGTCTCACCCACATTCTCTGATGTCCACGAGGTCTCTAGAAGGATCTAGACCCATTGCGTACGCTGCAGGTCGAC	TAACTTCTCTTCTTTTTCTTGAAATAAAGGCCGAATTATACGATACGGTGTCGGTCTCGTAGACGGAGTCATCGCCTAGCATATCGATGAATTCGAGCTCG	AGAAGGATCTAGACCCATTG	tag_12572_st	ACGGAGTCATCGCCTAGCAT	tag_12960_st	TCCAATAACGCTCCCTCTTG	TGTCATCCAGCTCAAGATCGTA	GATCTTGAGCTGGATGACAAAA	ATCGTTCAGTTGGTGGGTTC	392	631	388	868	762	2158
SNR37	10	-	228094	228479	767	2402	TTCTTTAAAATTCAAATTTTTCTTTTGATTTTTTTTCAAAAGGCTGATGTCCACGAGGTCTCTAGACGTAGTCGACGATCCTGCGTACGCTGCAGGTCGAC	CGTAGGCACTACAAATTATGGGAATGAGAAAGTATACAAAATATACGGTGTCGGTCTCGTAGACGGTCAGAGAATCCGGCATATCGATGAATTCGAGCTCG	AGACGTAGTCGACGATCCTG	tag_12376_st	ACGGTCAGAGAATCCGGCAT	tag_12986_st	AGCCGGGTCACACTAAATTG	GAAACCGGAAACGAAATGAA	TTCATTTCGTTTCCGGTTTC	CTTCAACAGCGAAACCTCCT	414	456	540	1012	935	2127
SNR39B	7	-	366374	366469	378	1619	TAAACTCTCTATCCAAGATGAGGAATAGGATAAAGAGATGTATTTGATGTCCACGAGGTCTCTATTTAGGCCGGAGACCGATGCGTACGCTGCAGGTCGAC	TACAAACGTAATACGTAGAAGAATGGATAAAATAGATGTATTAAACGGTGTCGGTCTCGTAGGGTATCTTCAGACTGCCTTGATCGATGAATTCGAGCTCG	ATTTAGGCCGGAGACCGATG	tag_12274_st	GGTATCTTCAGACTGCCTTG	tag_12621_st	CTTGCGATGAACGAGAAAAA	GCCCCGAAAGATGGTGTAA	CATTCCAAAAAGTGACTAGCAAAA	TGCTTGGTTGGTTATTTGGA	384	591	432	985	753	2235
SNR4	5	+	424698	424883	1107	5566	TTTTTGTCATTGATCTTTTCATTTTTTTATTTCAAAATCCCCATCGATGTCCACGAGGTCTCTATAGGGTTTCTCCGCACCTGCGTACGCTGCAGGTCGAC	CTGGATGCTCCATAGATTCCAAGATTTACGTAAGAATTCAAAATACGGTGTCGGTCTCGTAGATATCGCCACCGGTACGCATATCGATGAATTCGAGCTCG	ATAGGGTTTCTCCGCACCTG	tag_12358_st	ATATCGCCACCGGTACGCAT	tag_12967_st	GCTCCTCCACAAAGACCAAG	AACGCCCCGGATAACTAGAG	CTAGTTATCCGGGGCGTTTT	TCCTGCCTTTATGCCTTCTG	541	758	589	1088	1113	2505
SNR40	14	+	89210	89306	1313	997	ACACATGACGAAGATGAAAATTAAACATGAATTCAAGGAAAAATGGATGTCCACGAGGTCTCTATTAGCAGGGACTGACATTGCGTACGCTGCAGGTCGAC	GTCACAGATGTGAGAGAAAAAAAAAAAAGAAAATAAAGGAAAATGCGGTGTCGGTCTCGTAGATCCTGACGACGTCGAGCATATCGATGAATTCGAGCTCG	ATTAGCAGGGACTGACATTG	tag_12571_st	ATCCTGACGACGTCGAGCAT	tag_12958_st	GGGGCTCTTAGTGGGAGAAA	CTTGTGGCATCCATGTTCAG	TGAACATGGATGCCACAAGT	CGAGCCATATCGGAAAGAAC	499	746	385	942	866	2347
SNR41	16	-	719148	719242	680	1182	ATATATGAGTTCCTTTTTTCTTTTTCCATTTTCTTTCTGTGTGACGATGTCCACGAGGTCTCTGAGATACCTCCATAGGCATGCGTACGCTGCAGGTCGAC	TAAATGCTTTCTTTTCTTCCCTTCCGTGGCACCCCTCATACAAGGCGGTGTCGGTCTCGTAGTACTGTACGCCAGATCGTTGATCGATGAATTCGAGCTCG	GAGATACCTCCATAGGCATG	tag_12248_st	TACTGTACGCCAGATCGTTG	tag_12656_st	ACAAGCAAGTATCCCGCAAG	AAACCACTATTCAGTCGGAACAA	CGACAACCCTTTTTCGTTAAGT	TAGACGGCGACCCTTTAACA	500	740	186	781	697	2180
SNR42	11	-	559016	559366	1339	300	CCTGGACCTTTGATGCTTTAAAAAACATTTCTCTTAAAAGAAAGCGATGTCCACGAGGTCTCTAGACTCCAGGACGATCATTGCGTACGCTGCAGGTCGAC	CCGCATACTATAAATACGTATATATAACAAAGTAACCATCAAGAACGGTGTCGGTCTCGTAGACGTCGGCATCTTAGATCATATCGATGAATTCGAGCTCG	AGACTCCAGGACGATCATTG	tag_12579_st	ACGTCGGCATCTTAGATCAT	tag_13012_st	TGCTCCCAGCTTCTTTCTTG	AGGCTCCCTAAAGCATCACA	GAGCCGGATTTGTCTTTTTG	TATGAAAGGTGGGGAGATGC	559	828	624	943	1203	2430
SNR43	3	-	107504	107712	481	309	GTGTTTTGTGCAGTGTATTACCAACTTGCGCATGCAAGGATATCAGATGTCCACGAGGTCTCTAGAGAGACCTCACGATCTTGCGTACGCTGCAGGTCGAC	AGAAAAATAAGCAAAATAAGTATACATAAAAATAAATACGAATAGCGGTGTCGGTCTCGTAGACTAGCCTCAAGTGTAGCATATCGATGAATTCGAGCTCG	AGAGAGACCTCACGATCTTG	tag_12633_st	ACTAGCCTCAAGTGTAGCAT	tag_12962_st	AAGCACAAAGCACAGCAAAA	GACAACCACACGGTCTTTGA	TCAAAGACCGTGTGGTTGTC	CTTCTCTCCGCTTCCCTTTT	697	849	536	1075	1214	2583
SNR45	16	+	821732	821903	309	717	CAAGACGCGTTAGATTTTCTTTGGAGGTTTCATTTAAAGAAACCAGATGTCCACGAGGTCTCTATAGGTGTCCACCAGCACTGCGTACGCTGCAGGTCGAC	GAGATGACTACTCCCAAGTCAAAAACAACAAAAGAATGAAAGAAACGGTGTCGGTCTCGTAGATATGGATCTGCCGCATCATATCGATGAATTCGAGCTCG	ATAGGTGTCCACCAGCACTG	tag_12337_st	ATATGGATCTGCCGCATCAT	tag_13009_st	GTGCTCTTTTTGGACGAAGG	CAGGAACCGCTATCTCCATT	AATGGAGATAGCGGTTCCTG	GTAGTTGATGCCCGAAGGTG	654	847	417	952	1052	2458
SNR46	7	+	545370	545566	722	591	AGTGAAAGTTTTAGGGTTCTTGTGACAAACTTCACCAACATAAACGATGTCCACGAGGTCTCTGCCAATAGCATATTCGCGCACGTACGCTGCAGGTCGAC	AGGCTTAATCGATATCAGAACTACCAATTGTTCCTACTACAAGAACGGTGTCGGTCTCGTAGTCGACGCAACACTCGTTAATATCGATGAATTCGAGCTCG	GCCAATAGCATATTCGCGCA	tag_1264_st	TCGACGCAACACTCGTTAAT	tag_12864_st	CGTGAAAGATGACCAAGCAC	AATCCATAAACCACCGCAAA	TTTGCGGTGGTTTATGGATT	CAGGAAGAAAGGCTCAAGGTT	392	637	370	828	743	2124
SNR47	4	-	541602	541700	399	1669	TATCTTTTTCCTTATTATACATTCTCTTGGCGAGTGATCGAAAATGATGTCCACGAGGTCTCTTAACCTACGCCAGAGGCATGCGTACGCTGCAGGTCGAC	AGAATAAGAAAAAAGAAAATCAGCAAGAATGACGCGAAAATATATCGGTGTCGGTCTCGTAGTAGGATTGCCACCACCAGTGATCGATGAATTCGAGCTCG	TAACCTACGCCAGAGGCATG	tag_12247_st	TAGGATTGCCACCACCAGTG	tag_12450_st	CCCCAAACCTTCTTCATTCA	CGGACGAAGAAATTCATGTTG	TCTTCGTCCGAATCCTTTATAGGTG	CCCTGTTATCCGCCTTTCTT	631	881	284	845	906	2385
SNR48	7	+	609584	609696	2021	868	CCTTTTTTTCTTTTCAGTTTTTTCTCCTTTCATCCGTCTCGTTTAGATGTCCACGAGGTCTCTCACCGGGTTTCTAACTTGTGCGTACGCTGCAGGTCGAC	TTAGTTCCTTTTTTTTTTCTCCCTCGGTCTGTTTAATCATAGTAACGGTGTCGGTCTCGTAGATGGGCCTACCATTCCTCATATCGATGAATTCGAGCTCG	CACCGGGTTTCTAACTTGTG	tag_12562_st	ATGGGCCTACCATTCCTCAT	tag_13025_st	AGTTCCAACAGCCATTCCAC	TTAGAGATGCCAGAAAAAACATATAGG	ACCTATATGTTTTTTCTGGCATCTC	ACTGGCTCTGCTCTTTCCTG	591	839	400	931	964	2429
SNR49	14	+	716120	716284	732	2043	TTTTTTCCTTGATTTTACTTTCAATTTAGTTTACAATATCATGGGGATGTCCACGAGGTCTCTGCCACTGTCTAGAATTACTGCGTACGCTGCAGGTCGAC	CTGGCGATTGTTAGGGACAAGAAAACAAGCCATGTTGTAACCAATCGGTGTCGGTCTCGTAGTGCAGAGTGCGATTGCCATGATCGATGAATTCGAGCTCG	GCCACTGTCTAGAATTACTG	tag_12355_st	TGCAGAGTGCGATTGCCATG	tag_1303_st	TTTGCTCCACCGCTCTCTAC	CGGGATTCGTTTACCATAGG	TGGTAAACGAATCCCGTAGATTA	CCGAGGCAGAAAAGAAAAAG	386	630	386	881	757	2170
SNR5	15	+	842403	842606	221	211	CTTTGAACTTACTTCATTTGCAGGATCCTTCAGGATAAGAAAACCGATGTCCACGAGGTCTCTGACCTCACTTTCTGCATTTGCGTACGCTGCAGGTCGAC	TGAAGTATATGTACGATGTATACAATGTAAACAAGAGAGTAATGACGGTGTCGGTCTCGTAGGTATTGGCACACGCGTCCATATCGATGAATTCGAGCTCG	GACCTCACTTTCTGCATTTG	tag_12677_st	GTATTGGCACACGCGTCCAT	tag_12947_st	AAGGCGAGGTGAAAGAGAAA	TGGTCTACTTCCAGCCATTTG	CAAATGGCTGGAAGTAGACCA	TACCAGCGTCTTCTCCACCT	491	697	712	1201	1183	2557
SNR50	15	+	259489	259578	2744	345	TAATTGGTATTGCTCGAACATCTAGGAATAAGAGAAGGACTTACTGATGTCCACGAGGTCTCTCACGCGGCAGACGAGTTAATCGTACGCTGCAGGTCGAC	CACTACGGGCTAGAAAAAAAATAAAGGAAATGTTTCTTACATTAGCGGTGTCGGTCTCGTAGCAAAGGAGAGAGTATCGCATATCGATGAATTCGAGCTCG	CACGCGGCAGACGAGTTAAT	tag_12861_st	CAAAGGAGAGAGTATCGCAT	tag_12973_st	ATGTCCGATTTTACCGTGGA	TTCAATCACGAAAAATCTGCTG	GCAGCAGATTTTTCGTGATTG	CAGGTTTTGCGATTTTTACCC	545	793	503	1062	1026	2514
SNR51	16	-	718700	718806	2544	244	TTATCAGTTGATTTGGATGATAAAAGAGACTGTTGCGGACTAGTTGATGTCCACGAGGTCTCTCGAGACTGTTAGGAATCATGCGTACGCTGCAGGTCGAC	AAGGGCTACATAGGGTGCAAGATTAGTTAGGTTGTAGAACTAGTTCGGTGTCGGTCTCGTAGGTGTAAGCGGGATTCCTCTGATCGATGAATTCGAGCTCG	CGAGACTGTTAGGAATCATG	tag_12253_st	GTGTAAGCGGGATTCCTCTG	tag_12427_st	CACGGAAGGGAAGAAAAGAA	TCATCAATTAGCCCCTTCGT	AACGAAGGGGCTAATTGATG	TGAAAAGGACCAAAGGCAAA	392	621	362	925	734	2205
SNR51/70/41	16	-	718700	719242	2544	1182	ATATATGAGTTCCTTTTTTCTTTTTCCATTTTCTTTCTGTGTGACGATGTCCACGAGGTCTCTGCCTAGATTCGATTCTCATGCGTACGCTGCAGGTCGAC	AAGGGCTACATAGGGTGCAAGATTAGTTAGGTTGTAGAACTAGTTCGGTGTCGGTCTCGTAGTAGACGGTAGGACTTAGTTGATCGATGAATTCGAGCTCG	GCCTAGATTCGATTCTCATG	tag_12259_st	TAGACGGTAGGACTTAGTTG	tag_12649_st	ACAAGCAAGTATCCCGCAAG	CCCCTCATACAAGGCTGAAA	GGTCGCCGTCTACTCTCATC	AAAATGTGATACCGCCAAGC	551	740	585	907	1271	2306
SNR52	5	-	431129	431220	680	1275	ATGTTTCGGCGTTCGAAACTTCTCCGCAGTGAAAGATAAATGATCGATGTCCACGAGGTCTCTTCACCCTATGCAGAGCGATGCGTACGCTGCAGGTCGAC	CTGTCAGAGGTGGCATTTTACATAACAATAGTGACAAAAAATAAACGGTGTCGGTCTCGTAGTAGGGACCTCACGCCATTTGATCGATGAATTCGAGCTCG	TCACCCTATGCAGAGCGATG	tag_12276_st	TAGGGACCTCACGCCATTTG	tag_12675_st	AGTGGAAGCTGAAACGCAAG	GTATCAGAGATTGTTCACGCTAATG	GCGTGAACAATCTCTGATACAAA	CTGGGCTCTGCCAAACTTAC	530	788	517	1067	1028	2514
SNR56	2	+	88190	88277	401	1163	GCTAGACGGTGCTTTTGCTGGTAAAAGAAAAACTCTTGTTTCAATGATGTCCACGAGGTCTCTCATGACTGACCAGGACTCTGCGTACGCTGCAGGTCGAC	GTTTGCAAGGTCATAGTATATACAGAAATAAGAACGATTAGTTAACGGTGTCGGTCTCGTAGCCTGACTCATCGTAGTACATATCGATGAATTCGAGCTCG	CATGACTGACCAGGACTCTG	tag_12425_st	CCTGACTCATCGTAGTACAT	tag_12893_st	GTCCCAGCGATAAGGAGGA	ACTTCGAAAAGTTCAGTACAGG	ACACAGACCTGTACTGAAC	CAAGAGCAAGAACGCTGAAA	418	663	510	1068	900	2390
SNR57	12	-	794937	795024	143	1311	ACGAGCACCTTTGATACCGATTTTAGTTTGGGAGATATCGAGGTTGATGTCCACGAGGTCTCTAAACGTCCAGCTTGCAGAATCGTACGCTGCAGGTCGAC	CGTAGCACTTTTTGATGTAGTCTAAGTTGGAAAATAAAGAGGCCACGGTGTCGGTCTCGTAGTCGCACGTCGGAGTAGATTGATCGATGAATTCGAGCTCG	AAACGTCCAGCTTGCAGAAT	tag_12772_st	TCGCACGTCGGAGTAGATTG	tag_12585_st	TCGAAGCATTCCAAGCAAG	TTCCTAATTCACAATATGTCCTGC	TGCAGGACATATTGTGAATTAGG	GAATCATCGCCGGATAAAAA	670	896	234	815	880	2370
SNR61	12	-	794486	794575	568	219	GTGATATTATATAAAGTTATACCTAAATCAAGTGTGGAATGTTGTGATGTCCACGAGGTCTCTTCCCTAGTGCAGGACAGATGCGTACGCTGCAGGTCGAC	CGTACGAATGCAAGAAAATTAATAATTACAAGGAATGTTGAACAACGGTGTCGGTCTCGTAGTATACGGTCAACATGGTCTGATCGATGAATTCGAGCTCG	TCCCTAGTGCAGGACAGATG	tag_12262_st	TATACGGTCAACATGGTCTG	tag_12434_st	TGGTCCTTTACGAGCACCTT	TTTGAGCTTTGGTAAAATTGGTT	GGAAGATAACCAATTTTACCAAAGC	TTCTTTTAGGTTCCTTCGCATT	585	800	366	951	922	2410
SNR61/55/57	12	-	794486	795024	568	1311	ACGAGCACCTTTGATACCGATTTTAGTTTGGGAGATATCGAGGTTGATGTCCACGAGGTCTCTAAAGCGCATTAGACACACTGCGTACGCTGCAGGTCGAC	CGTACGAATGCAAGAAAATTAATAATTACAAGGAATGTTGAACAACGGTGTCGGTCTCGTAGTGACTAGACTCACCTCATTGATCGATGAATTCGAGCTCG	AAAGCGCATTAGACACACTG	tag_12329_st	TGACTAGACTCACCTCATTG	tag_12581_st	TCGAAGCATTCCAAGCAAG	GAATCATCGCCGGATAAAAA	TATCCGGCGATGATTCCTT	TCGCGGAGATTTTTCATTTT	880	896	776	1125	1641	2680
SNR62	15	-	409765	409864	1340	1006	GAAGTGTCAAAGTGTCTGAACGGGTGCCGTAAAAGACCTATTCTTGATGTCCACGAGGTCTCTAATACGGAGTAAGCAGACTGCGTACGCTGCAGGTCGAC	GCTTGTGAAGAACTCACTACCTTCTTGAAGGAAGTAAGAAAAAATCGGTGTCGGTCTCGTAGTGGCCTCGCAATGCTCAAATATCGATGAATTCGAGCTCG	AATACGGAGTAAGCAGACTG	tag_12341_st	TGGCCTCGCAATGCTCAAAT	tag_12712_st	ATGGCCCGTTCTGACTAAAA	AGAATTGTTGATAGTCGTATATCTTCC	ACAATAGTTATAATGGAAGATATACGAC	AGAAAGCCACGGAATCACAC	655	857	428	1005	1043	2521
SNR63	4	-	323217	323471	991	2678	TTCTTGCTGCTCTATGTTTTGCTGAAAGCGAATGAATTATGGACTGATGTCCACGAGGTCTCTAATTCGAGGCCATACGATTGCGTACGCTGCAGGTCGAC	AAAAGATGCAAGTCTACGTATAAGTGAAGGCGATAAAAATGGATACGGTGTCGGTCTCGTAGTTAGTGGACCACCCGCATTGATCGATGAATTCGAGCTCG	AATTCGAGGCCATACGATTG	tag_12587_st	TTAGTGGACCACCCGCATTG	tag_12574_st	GGGGGAACAAGGATAATAGCA	TACCGTGCGTCTGATTATGG	CCATAATCAGACGCACGGTA	ACGAAGAAGAAGACGCCAAG	339	466	435	953	755	2078
SNR64	11	+	38811	38911	658	252	TCGCCTCACTAGTTTGTAGTAGGGTGGGAGAAACGATGGAGTGGAGATGTCCACGAGGTCTCTCCAAATAATACAGTGGCGTGCGTACGCTGCAGGTCGAC	TTACAATCACATGAATACAAGATCATAGCTTAACAAGGAGTGGATCGGTGTCGGTCTCGTAGCCTTATAGGTCGCGGAACATATCGATGAATTCGAGCTCG	CCAAATAATACAGTGGCGTG	tag_12497_st	CCTTATAGGTCGCGGAACAT	tag_12871_st	ACGGTGAGGTCCAGAAGAGA	TTGTCCCTATCTGGTTCCTCA	TGAGGAACCAGATAGGGACAA	TGGCTCTGGTCACATCTCCT	494	763	635	1164	1109	2586
SNR65	3	+	177183	177282	745	938	AAAAGGGGTAGCCTGCTTCACCAGATGTTCTTGTCAACAAAATTCGATGTCCACGAGGTCTCTCCAAGAAGATACAGGCATTGCGTACGCTGCAGGTCGAC	CATTACGGAAATGTAAGGACACAATTACCAAGAGTTACAAAATCGCGGTGTCGGTCTCGTAGCGACTCATAGCTCCTTACATATCGATGAATTCGAGCTCG	CCAAGAAGATACAGGCATTG	tag_12576_st	CGACTCATAGCTCCTTACAT	tag_12898_st	AGCACCAACCTGACTGTGAA	AGATTTAAAACTGTCGAAAACACTG	TACAGTGTTTTCGACAGTTTTAAATC	GTAAGGAAACCATCGCCAGA	456	660	560	1149	990	2468
SNR66	14	+	586090	586175	503	645	TATTGGTAAACTTGTGTAAGAAGAAGATGGAATAGTGAATAATTCGATGTCCACGAGGTCTCTCCAGCGCACTAGTTATCAATCGTACGCTGCAGGTCGAC	TCAATTATATAGAATGAGGAACAATGGTAAGTAATGAATAATCATCGGTGTCGGTCTCGTAGCGCTTGCTCATAGGGAAGAAATCGATGAATTCGAGCTCG	CCAGCGCACTAGTTATCAAT	tag_12753_st	CGCTTGCTCATAGGGAAGAA	tag_13_st	GGTTGAAAGTCTCCCACCAA	GCTTGACTCTGTTGCATTGGT	CCAATGCAACAGAGTCAAGC	GGCCGTCTCTCCTAGATCGT	460	722	632	1184	1073	2565
SNR67	5	+	61352	61433	501	266	ATGATAAAGACAACTTACAAGTACAGTTTTTTGTTGGTATCTCATGATGTCCACGAGGTCTCTCAGCTAGTATGAGCGACCTGCGTACGCTGCAGGTCGAC	TCCTTGAGAAAACTTTTGATGTTTAATGTGTAAATATCTCATTAACGGTGTCGGTCTCGTAGCACTCTTGAGCAGGGATCATATCGATGAATTCGAGCTCG	CAGCTAGTATGAGCGACCTG	tag_12360_st	CACTCTTGAGCAGGGATCAT	tag_13015_st	TCCACCTCGCGTAGTCTTTT	CATTTCAAAGATCCGCTTGG	GCGGATCTTTGAAATGACTGA	AGCGCAAGTGGTTTAGTGGT	406	660	581	1149	972	2468
SNR69	11	+	364776	364876	2154	729	GCTTTTTCGGTCTTTCCTATGTAACATAACATGTATATTCTATTTGATGTCCACGAGGTCTCTCCTCAGGATGAACGAGATTGCGTACGCTGCAGGTCGAC	GCGTAAGACAAGTAACTACAAATGTTGTCGCATGTATATTCTATTCGGTGTCGGTCTCGTAGCGTACTATACAGAGCTGCATATCGATGAATTCGAGCTCG	CCTCAGGATGAACGAGATTG	tag_12583_st	CGTACTATACAGAGCTGCAT	tag_12995_st	TTTGTGCGTGCTTTTACCTG	GGACGTGGTCTCATCATAAACA	CCAGCTCTTCGATTCGTTTT	CCCTTCCCATAATCGTCTTG	405	682	484	1046	910	2387
SNR70	16	-	718887	719050	419	1374	TTATTATCTTTTTCATGCCTGCAATGGAATTTTTAATTTTCCTTTGATGTCCACGAGGTCTCTCTCAGGATACCCCAGTGATGCGTACGCTGCAGGTCGAC	CAACTGATAAGGAATAAATTGAAATAAGAAACAAATTTCCGAAAACGGTGTCGGTCTCGTAGTACTCACGTAACATGCGCTGATCGATGAATTCGAGCTCG	CTCAGGATACCCCAGTGATG	tag_12287_st	TACTCACGTAACATGCGCTG	tag_12395_st	TACCTGCCTGACCAGTACGA	TAGACGGCGACCCTTTAACA	GGTCGCCGTCTACTCTCATC	AAGGACCAAAGGCAAAAATG	653	888	599	1108	1241	2655
SNR71	8	+	411228	411317	4125	1089	GTGATACTCATTTTTTGTCTGCCAATAATATAGTCCTGTTTATTTGATGTCCACGAGGTCTCTCCTTTGCTAGTGATGTAGTGCGTACGCTGCAGGTCGAC	CAAGAGAATTGCCTGCGAGACTATATAGTACTAAGTTTATTGTTTCGGTGTCGGTCTCGTAGCGTTATCGCACCTACGGCATATCGATGAATTCGAGCTCG	CCTTTGCTAGTGATGTAGTG	tag_12474_st	CGTTATCGCACCTACGGCAT	tag_12984_st	CCCTTTCCGGGTTTCTTTT	CTGAGTGAGCTGAGAAGGTTATC	GATAACCTTCTCAGCTCACTCAG	AACAAAGTGTCAAAACGCAGAA	312	577	642	1184	932	2420
SNR72	8	+	298554	298651	247	217	ATATTAACTTGAGTAAATTTTCTCTTGCGTTAATTATAACTAATTGATGTCCACGAGGTCTCTCGACCCTCACAGTGTTAAATCGTACGCTGCAGGTCGAC	GATGAAAAAGGTAGAATGGATAAAATACTTAAAGAATTTTATATGCGGTGTCGGTCTCGTAGCGTTTAGCATACCCGATCATATCGATGAATTCGAGCTCG	CGACCCTCACAGTGTTAAAT	tag_12734_st	CGTTTAGCATACCCGATCAT	tag_13013_st	TGATGATTTCCACATTTCACG	GCTTGTGATCAGACTGACGTG	ATGTGATGACAACTTCTTGAGC	TGCGTAGCAAGCATCTTTTC	338	539	684	1211	929	2409
SNR72/73/74/75/76/77/78	8	+	297277	298651	539	217	TTAGTTTTTCAGATATGTCTTTTGTCATTATCACAGGCTAATTATGATGTCCACGAGGTCTCTCTGGGTACAGACGCGCTAATCGTACGCTGCAGGTCGAC	GATGAAAAAGGTAGAATGGATAAAATACTTAAAGAATTTTATATGCGGTGTCGGTCTCGTAGGGCGCATCCGAACTTATCATATCGATGAATTCGAGCTCG	CTGGGTACAGACGCGCTAAT	tag_12833_st	GGCGCATCCGAACTTATCAT	tag_13020_st	CTTAGCATTACCCGCACACC	TCGTTCAGCCAGTAATTCCA	AGAAATTGGGTCAAGCGAAC	ACAACTGCGTAGCAAGCATC	605	624	815	1216	2295	2499
SNR73	8	+	298307	298412	1569	456	ACAAACTGTTTCAAGGTTTTTAACTTTTCTCCAATTTCAAAAATTGATGTCCACGAGGTCTCTCGAGCGCAGGACATTCCAATCGTACGCTGCAGGTCGAC	TACAATGGTTCGCTTGACCCAATTTCTAAATTTGCTAAAAATATTCGGTGTCGGTCTCGTAGCTACCTGCTACGAGAGGCATATCGATGAATTCGAGCTCG	CGAGCGCAGGACATTCCAAT	tag_12746_st	CTACCTGCTACGAGAGGCAT	tag_12979_st	TGATGTGTCTGTATTGCTTCCA	TCGAAAAACGCAGTTGACC	TTGATGATATTTCGCCTGTGA	GCCATGTAATGTCTGGGTGTT	277	528	366	946	661	2133
SNR74	8	+	298138	298225	1400	643	TTCCATGTTTTTTAAAGAAAATTTCTACCTTAGAGACGTCAATGCGATGTCCACGAGGTCTCTCGCCTAGACCATTCGATAATCGTACGCTGCAGGTCGAC	ACAGTTTGTACGATCTCTCATCTCTCTCAGATAAATTTTCTAGTTCGGTGTCGGTCTCGTAGCTGTCGTACAACGAGATCATATCGATGAATTCGAGCTCG	CGCCTAGACCATTCGATAAT	tag_12813_st	CTGTCGTACAACGAGATCAT	tag_13011_st	TTTAGCGGGCCTAGAAAACC	ATTGCATCAGACACTAATTGCTC	TGAAACAAATTACTCAAATAGACAAGC	GCCATGTAATGTCTGGGTGTT	426	639	590	1133	941	2431
SNR75	8	+	297918	298006	1180	862	GAATGGATTTTTTTCTCATTTTCGTATAATTATGTGAATTGGTTTGATGTCCACGAGGTCTCTCGGAGGCGCAATGTCCTAATCGTACGCTGCAGGTCGAC	TTTTTTTCTATTTCCAAATTCTTTGCTAATCGAAAAGAATAATGTCGGTGTCGGTCTCGTAGGAGACGCGACATACCTGCATATCGATGAATTCGAGCTCG	CGGAGGCGCAATGTCCTAAT	tag_12831_st	GAGACGCGACATACCTGCAT	tag_12993_st	CGTTTTTGCACTATCCTGACC	CAGAAAGGCATGAATGGTAATTT	AAATTACCATTCATGCCTTTCTG	ACCGTCGTGAAATGTGGAA	427	645	362	952	767	2256
SNR76	8	+	297725	297833	987	1035	TAGTGCTATTCTTCCGTAGATTGATGTTTTCGATCTATTTGATACGATGTCCACGAGGTCTCTCGGCATATCTAACAGTCTTGCGTACGCTGCAGGTCGAC	CCATTCTTCCCTATAGAAAATTCTGTTAGCCCTCAGAAAAACTTACGGTGTCGGTCTCGTAGGCTAGTAGATACCAGTGCATATCGATGAATTCGAGCTCG	CGGCATATCTAACAGTCTTG	tag_12637_st	GCTAGTAGATACCAGTGCAT	tag_12998_st	CCTTTCATTTACCACACCCATT	AGGATATTTGTTTCCCCCTCA	TTTAGCGGGCCTAGAAAACC	ACCGTCGTGAAATGTGGAA	332	578	541	1125	893	2362
SNR77	8	+	297506	297593	768	1275	CCATTTCAATTTTCTTTTTATTCCATATTTATTCAAAGGTGTTTGGATGTCCACGAGGTCTCTCGGCCCTGTTTCATTACAATCGTACGCTGCAGGTCGAC	TATGGAAATGTGTCAACTTTCTAGTATTTATTTTAAAGGTGTTTGCGGTGTCGGTCTCGTAGGCTATACGACACTACTGCATATCGATGAATTCGAGCTCG	CGGCCCTGTTTCATTACAAT	tag_12738_st	GCTATACGACACTACTGCAT	tag_12992_st	GCCTGAAAACCCAACCATT	TCGTTCAGCCAGTAATTCCA	CGTTTTTGCACTATCCTGACC	GGTTTTCTAGGCCCGCTAA	647	894	245	843	906	2396
SNR78	8	+	297277	297364	539	1504	TTAGTTTTTCAGATATGTCTTTTGTCATTATCACAGGCTAATTATGATGTCCACGAGGTCTCTCTGCATCACCACATAGATTGCGTACGCTGCAGGTCGAC	CTATTTAGACTTTTCCTTTCAGTTTTTTCTTCTTTATTGCTAATTCGGTGTCGGTCTCGTAGGGCGAGTCCAACTTGTTAATATCGATGAATTCGAGCTCG	CTGCATCACCACATAGATTG	tag_12584_st	GGCGAGTCCAACTTGTTAAT	tag_12866_st	CTTAGCATTACCCGCACACC	ACGTTCTAATCACAAAAGATTCAG	CTGAATCTTTTGTGATTAGAACG	AGGATATTTGTTTCCCCCTCA	390	624	458	1033	825	2316
SNR83	13	+	626349	626654	538	1154	TTGTGATATTTACTATTCTAACTTGGCGCTATTAACGCTTTCACAGATGTCCACGAGGTCTCTGCCTTACGATGATCTTACTGCGTACGCTGCAGGTCGAC	GTTAAGAACAAGAATTTTTAAGTAAAAAATCTTACTTTTAAGAAACGGTGTCGGTCTCGTAGTTAGGGCTCACCTCACTCATATCGATGAATTCGAGCTCG	GCCTTACGATGATCTTACTG	tag_12356_st	TTAGGGCTCACCTCACTCAT	tag_13021_st	ACAAAACTCGCCCTTTCTCC	AATCGTGGGGGTATGAACAA	TTTTTCCACCCCGATTTGTA	GTGGTTGTTCCATCCGTTGT	609	716	368	923	1026	2298
SNR84	4	-	1492477	1493026	1383	1560	TACTCATCATCACACTATAAGCTTTATATGGATATGCTGATGTGAGATGTCCACGAGGTCTCTAGTATCCGACATCACCGAATCGTACGCTGCAGGTCGAC	GTACATACAGGTGCGCCGACCAGCGCCTATTCATAAAAACAAGAACGGTGTCGGTCTCGTAGAGCGTCAGGCGATCTTGCATATCGATGAATTCGAGCTCG	AGTATCCGACATCACCGAAT	tag_12783_st	AGCGTCAGGCGATCTTGCAT	tag_13003_st	GCGATGAGAACGACGATGTA	GCAACCTCAATCATGCCTTT	TCAAAGAAGCGAAAATACCTGA	CATACAAGGAAGACGGAAGCA	370	446	342	890	967	1995
SNR85	13	-	67768	67938	219	356	GCAACGGACAGGCGTCGTGCGCACAAACTTGCTCAGGGGCCCGAAGATGTCCACGAGGTCTCTAGTATGACCCACACCGATTGCGTACGCTGCAGGTCGAC	TTTCTGGCAAGGAGGGAGAAGACATAGATTGTTTGCGTATATATGCGGTGTCGGTCTCGTAGAGGAGCGCAGCCTTCATCATATCGATGAATTCGAGCTCG	AGTATGACCCACACCGATTG	tag_12588_st	AGGAGCGCAGCCTTCATCAT	tag_13010_st	GGCAACCCAAGGAAATAAGG	GGGAATAGCGTCCAAGCAC	CTTGGACGCTATTCCCACA	GTTATGATCGCCGGAAGAAG	408	536	441	1046	834	2241
SNR86	13	-	762110	763113	2303	4926	TTTAGTTCAGGCCTTGTTTTCAGTTTTTAGCTACTAAAAGAGGGAGATGTCCACGAGGTCTCTAGTCATACTCGACTGTTCTGCGTACGCTGCAGGTCGAC	TTTCAGCAAGACAAGATTGACATTATTAAGCGTGATCTAAACTATCGGTGTCGGTCTCGTAGAGGGAGCCAGAGATACTCATATCGATGAATTCGAGCTCG	AGTCATACTCGACTGTTCTG	tag_12442_st	AGGGAGCCAGAGATACTCAT	tag_13023_st	TGAACAAAAATGGAAACAATGG	TGAGAGAATGAAAAAGGAAGAAAAG	ACTAAAAGTTGGGGCATTCG	AGCCTGTCGGTATTGTGGTC	673	829	648	1156	2070	2644
SNR87	11	-	431030	431138	398	768	ATTTGAGGTACCAGTAGTTCTTATCAAGAAGATTCAATGAGAAAGGATGTCCACGAGGTCTCTACGACGGCACCATTATACTGCGTACGCTGCAGGTCGAC	CTGCCAGTTGCAACAACGCAAGTGTTATTAGAAATATTGTTCAAGCGGTGTCGGTCTCGTAGTTATACCGTACGACGTGCTGATCGATGAATTCGAGCTCG	ACGACGGCACCATTATACTG	tag_12351_st	TTATACCGTACGACGTGCTG	tag_12408_st	AGGGAAACCCGATTATGGAA	GGCGGTGTTCCAAGTGATTA	ATGGGTGATTAGCGAAGTGC	TTGCCGGTGATTTACATACG	617	860	496	1073	1123	2592
SNR9	15	-	407948	408134	884	291	CCATTTTCCTCCTTCTCTTTCTTCTTCTTTCTTTCCTAAAACCTCGATGTCCACGAGGTCTCTACTAACAGCCCATTGCATTGCGTACGCTGCAGGTCGAC	GCTTAAAAACGCTATGTAACTGGCATGCAGTCTAAATATTTGCAACGGTGTCGGTCTCGTAGTTCTCGGAGCAGCCAGATTGATCGATGAATTCGAGCTCG	ACTAACAGCCCATTGCATTG	tag_12577_st	TTCTCGGAGCAGCCAGATTG	tag_12582_st	GGCTCCTCCTCAGACTTCCT	TCCTCACCCATGAAGAAGAAG	CGCCTTTTCCTCTATGGCTA	GGGCAGAACAAGGAGTTTGA	713	871	381	857	996	2387
SUT001	1	+	9369	9601	353	2350	ACCATCGGAAAACTGCGCTAACTTTGGATAACGCCACAGAACGTGGATGTCCACGAGGTCTCTAGAGCACATCAATGAACCGCCGTACGCTGCAGGTCGAC	AGATATTCATCTCATTCAATTCTAATTGGTCAAATATCTACAATGCGGTGTCGGTCTCGTAGACAGAGTAGCGAGTCTCAGGATCGATGAATTCGAGCTCG	AGAGCACATCAATGAACCGC	tag_10058_st	ACAGAGTAGCGAGTCTCAGG	tag_11771_st	CATGTCTCCGCTTGGTTTCT	TTTACCTTACCGAATGACACCTTT	TGCGATGCAATTATCCACAC	CTGGTAACCGCGAGTAGAGC	234	495	185	710	557	1902
SUT004	1	+	198775	199895	6156	3508	TACGTCAATGCAAGTGATCCGCTTTTGAAGAAGCAAAAAATACTTGATGTCCACGAGGTCTCTCAGGTGTATACAGTTCTGCTCGTACGCTGCAGGTCGAC	TGAAGAATCTCAAAAAAAAAAAAAAAAAAAAAGGTTCTTCGAATGCGGTGTCGGTCTCGTAGACCGAGACATCATATTCAGGATCGATGAATTCGAGCTCG	CAGGTGTATACAGTTCTGCT	tag_1013_st	ACCGAGACATCATATTCAGG	tag_11776_st	TTCTGAGACACTCGGTTTCG	ATGCTTTGCTACGGACGACT	AGTCGTCCGTAGCAAAGCAT	TCCGCTCAACATCATACAGC	673	523	1283	1212	1937	2394
SUT007	2	+	196311	196735	2189	759	GATTAGCATAATACACTTATCAACAACAACCGGATGTGTGTTATCGATGTCCACGAGGTCTCTGAGTTTCTCTGAATATCCGCCGTACGCTGCAGGTCGAC	ACAACTAAAAGATGTAAAGCAAATATGAAGTTTATGCTGCCCATGCGGTGTCGGTCTCGTAGACTCTATCAGGATTGTCAGGATCGATGAATTCGAGCTCG	GAGTTTCTCTGAATATCCGC	tag_10069_st	ACTCTATCAGGATTGTCAGG	tag_11774_st	TCTGAACCGCCCAACTTATC	TATCTGCCCTCTTGCTGTCC	AACAGATTGTGCCGCTATGA	GGATGGCGATGATGAAAAAT	438	548	193	689	743	1896
SUT010	2	+	251616	252104	2810	2105	GCTTGCTTCTTCTGACTTCCTTCTTTTTTTTTTTTTTTTCGAAGTGATGTCCACGAGGTCTCTGGTCCCGCGATATAACTCAACGTACGCTGCAGGTCGAC	AAAGGATTAGCCATACGTTCTAGCACATTTTATGGGCCTAAGACACGGTGTCGGTCTCGTAGAGCCGTACTGATAAGTCAGGATCGATGAATTCGAGCTCG	GGTCCCGCGATATAACTCAA	tag_10_st	AGCCGTACTGATAAGTCAGG	tag_11773_st	TTGTTCTTTCTGCCGCTCTT	TTTGCGATGTTCTGATGCTT	ACATAGCAGCAAACCCGAAC	CATGGGGTTCGTCCTTAGTG	630	646	905	1192	1408	2497
SUT014	2	+	362864	364592	350	1127	TATTTGGCCTTTTACGACACTTATTCTTATGATCCATTGAAAGATGATGTCCACGAGGTCTCTAACAGGATGGTTAACTGGTCCGTACGCTGCAGGTCGAC	CAGTAATTATATTATATTATATTACATGCAAGCATTGAGGAGTATCGGTGTCGGTCTCGTAGATACAGGTCACAGACTCAGGATCGATGAATTCGAGCTCG	AACAGGATGGTTAACTGGTC	tag_10526_st	ATACAGGTCACAGACTCAGG	tag_11769_st	CACGTTTACGGGGAGCTTTA	CAACACCACCATTGAGAACG	ACATCAAGGTGGCAAACACA	CCTACCTTCTTCGGTTGCAG	1035	881	946	936	2627	2526
SUT019	2	+	532512	533192	330	570	TAGCGACAGATTGTAGTTTATGATCTGGTTATAATACCATGTATAGATGTCCACGAGGTCTCTAATACATTGGAGGCAAGTGCCGTACGCTGCAGGTCGAC	TAGTAAGAATTAGCAACTACTTTCATTCATCTTCGACGCAACTTCCGGTGTCGGTCTCGTAGATCATTTCATCGAGAGCAGGATCGATGAATTCGAGCTCG	AATACATTGGAGGCAAGTGC	tag_10231_st	ATCATTTCATCGAGAGCAGG	tag_11759_st	AGGAGACAAGCCGAAATGAA	GTATGGGAGCCTTGAAACGA	AAAAGGTGGTTGGGGAAGAG	GCCCCTGTCCTGTAGACATC	510	586	272	839	1187	2084
SUT035	3	+	205762	205938	365	706	GAATAACTCTTGGATTAAATAAATAAAAAAAATACAATTATCACTGATGTCCACGAGGTCTCTACACGGATCTTAGGCACTTCCGTACGCTGCAGGTCGAC	ATAAATGTTTTCTTATAACATAAAAAAAGCTATAGTTATATAAACCGGTGTCGGTCTCGTAGATCCCAGGTTCTATAAGAGGATCGATGAATTCGAGCTCG	ACACGGATCTTAGGCACTTC	tag_10599_st	ATCCCAGGTTCTATAAGAGG	tag_11778_st	TAGGAGTGGCGTTTTTGGAA	TGAAGAAACTGTCCATCAAACATAA	TTATGTTTGATGGACAGTTTCTTCA	ATCCCACCATTTTCCTCGTT	503	692	350	879	829	2230
SUT042	4	+	80713	82585	301	963	TATACTCTTTTTTTTGTAAAATATGTACTTGAGCTGCTGCATTCTGATGTCCACGAGGTCTCTATATCATACCGAGGTGCTTCCGTACGCTGCAGGTCGAC	CAAAGAAACTGTGCAGGAAATGAGAACGGCAAGAAAAATATTGGTCGGTGTCGGTCTCGTAGATGCACGAGAGCTCTACAGGATCGATGAATTCGAGCTCG	ATATCATACCGAGGTGCTTC	tag_10616_st	ATGCACGAGAGCTCTACAGG	tag_11749_st	GTGTTGTTGCGGAAGGAAGT	AGGAACCGAAAAGCCAGTTT	AACGCTTCGGTAATCTGGTG	TGGAAAATGAGGTGGTCTCC	1131	827	673	1082	2863	2568
SUT049	4	+	407601	408201	395	1656	CATTCAAGAAGGCAATTAAAGAGACTATGTGTACATGAATGGGAAGATGTCCACGAGGTCTCTATCTATGAGCCTGCAGTGCTCGTACGCTGCAGGTCGAC	ATCACCCTCGTTATTTATATTCTTTTCTGGAATATTTAGATATGCCGGTGTCGGTCTCGTAGATTTATGCCGTGCACGCAGGATCGATGAATTCGAGCTCG	ATCTATGAGCCTGCAGTGCT	tag_1014_st	ATTTATGCCGTGCACGCAGG	tag_11762_st	CAGGCTGCTCTTTTCTGTCC	ATTCGCTTTCCAAATCATGC	GCATGATTTGGAAAGCGAAT	GGGATTGGAACACAACAAGG	569	677	726	917	1276	2253
SUT053/468/CUT494	4	-	505330	506580	635	1567	CTCACCGCACTAAGAACTAGCCGGAGAAGACTAAGCTAGGAAAGGGATGTCCACGAGGTCTCTTAGCCCTACGAGTGACCAGTCGTACGCTGCAGGTCGAC	ATTATGTAGTATACTCCTTTTCACGTTTTTGCAAGAAATATTCCTCGGTGTCGGTCTCGTAGTTTGACGCCGCACTACCAGTATCGATGAATTCGAGCTCG	TAGCCCTACGAGTGACCAGT	tag_14028_st	TTTGACGCCGCACTACCAGT	tag_14029_st	TTGCTCACCGCACTAAGAAC	ATGAAGCGAGTACTGAACGA	CCGAGAGTTTGACAACTTGT	ATCCGGAGTATGACAGTCCA	429	951	2189	347	692	1697
SUT055	4	+	544043	544730	674	1912	CAAATATGCGGAAAATCAACTTATAAGTAGAAAAATACTAGCGATGATGTCCACGAGGTCTCTATGACTGCTGGCAGAGTGCTCGTACGCTGCAGGTCGAC	ATATATTATTATTAATATTATTTTTTAGTTCCGAAAGGAGAAACTCGGTGTCGGTCTCGTAGCACTATACTCCGCAGAGAGGATCGATGAATTCGAGCTCG	ATGACTGCTGGCAGAGTGCT	tag_1015_st	CACTATACTCCGCAGAGAGG	tag_11781_st	CATTTCTTGGCTTTCCCTGA	ATCTGGCTACCCGTCGTATG	GGCGTGGCTCTTTCATCTTA	GCCGTAAATGCGAGTGTTCT	548	450	788	1274	1493	2383
SUT056	4	+	556739	557099	267	961	ATGCGTAACAAACCACCTGTCAGTTTCAACCGAGGTGGTATCCGAGATGTCCACGAGGTCTCTCAATCTTGCGCAATACGGGCCGTACGCTGCAGGTCGAC	TGATGGAACTGGACGAATCCATCAATAGATACGTCCTGAGGACCGCGGTGTCGGTCTCGTAGCCATATTAGTCACAGGCAGGATCGATGAATTCGAGCTCG	CAATCTTGCGCAATACGGGC	tag_10159_st	CCATATTAGTCACAGGCAGG	tag_11766_st	CCCACTTAGCACCAACATCC	CGTTAGTGTGAGCGGGATTT	AAATCCCGCTCACACTAACG	AGTCGCCAGTTTCCAAGAGA	786	834	357	848	1124	2341
SUT058	4	+	680212	680420	448	1197	AATTATTTTCTTAGGTATAATGAAGTAATTATGACGAAGTACTTTGATGTCCACGAGGTCTCTCACCCAGCAGCAGTAAGATCCGTACGCTGCAGGTCGAC	ATATACACGTATATACAGATACTTTATAACATACAATTCTGGTTACGGTGTCGGTCTCGTAGCCATGAGAGGGATTTCCAGGATCGATGAATTCGAGCTCG	CACCCAGCAGCAGTAAGATC	tag_10347_st	CCATGAGAGGGATTTCCAGG	tag_11757_st	GCGCTCCTTCCCTTTATTCT	TTAAATGGCTTCGCTTCACC	AGCAACCGCTTTTAACCAGA	TCCACGAAGAATGAGCAAAA	529	694	494	1104	1088	2457
SUT067	4	+	1140661	1140701	4729	467	ATAGCCATAATGAATCAACAAATTGTATTATTATTTCCGACAACAGATGTCCACGAGGTCTCTCACCCATGTTCACGAAGATCCGTACGCTGCAGGTCGAC	CTCTTTGGAAAAACCAACCTTGATCGCGCAGCAATGTGGCAATGCCGGTGTCGGTCTCGTAGCTACTACTGACATCGAGAGGATCGATGAATTCGAGCTCG	CACCCATGTTCACGAAGATC	tag_10346_st	CTACTACTGACATCGAGAGG	tag_11783_st	GCGGAAGATGAGGATGATGT	GCCATCACCCGGTAAATAGA	TATTTACCGGGTGATGGCG	ACGGCTCTTCTACAGGCTCA	406	682	222	807	611	2148
SUT071/483	4	+	1174416	1174898	240	931	GCGGTATGAT ACAAAGCACT GCAAGTCATA GCTGAGGTAA AAAAAGATGTCCACGAGGTCTCTGTACGCTTACGGATGTCTCTCGTACGCTGCAGGTCGAC	TCATCTTTTTACACCGTATATGATAATATGCTAGTCGATAGATGGCGGTGTCGGTCTCGTAGGGCTCCGTACATGCAGTTCTATCGATGAATTCGAGCTCG	GTACGCTTACGGATGTCTCT	tag_13920_st	GGCTCCGTACATGCAGTTCT	tag_13985_st	GCAAGCACGCAGTTACGATA	TTTAACCAACCGAGCCTAAAAA	AGGCTCGGTTGGTTAAAAGAG	GAGCGGTGACAATGTGAGAA	333	625	456	1169	1592	2468
SUT084/SUT499	4	-	1513996	1516478	1902	1197	TACTAAGATTAATACATCAAAAACGATATCGTTGCCATGTACGTGGATGTCCACGAGGTCTCTCCCTTAGGTGGATGGGTTATCGTACGCTGCAGGTCGAC	ATGATGATGT AGATGCGTAA TACTCTATAA ATGTAACATC GTTAACGGTGTCGGTCTCGTAGAACGGTCATTGGTCCATTCTATCGATGAATTCGAGCTCG	CCCTTAGGTGGATGGGTTAT	tag_13386_st	AACGGTCATTGGTCCATTCT	tag_13966_st	CATGAATGTCGATCAGAGACG	TCCAAGTGTTGAAGTTCTCTTCTG	ACGTGCCGTTAATTTTGCTC	CAACTGTAGTGCCTGCTAGTGAA	397	542	299	843	3592	2074
SUT085	4	+	1521093	1522253	395	996	ATGTTCGCTGCGGCACCCAAAATAGATAGAGTGGATTACAATTTAGATGTCCACGAGGTCTCTCCTACTCATAGATTGGGATCCGTACGCTGCAGGTCGAC	TCTAAAATGCTATTTAAGTATCGCTCAAAAGAAAACTACAAAATTCGGTGTCGGTCTCGTAGGAATACACCTGATGTTCAGGATCGATGAATTCGAGCTCG	CCTACTCATAGATTGGGATC	tag_10357_st	GAATACACCTGATGTTCAGG	tag_11777_st	TGGTGTGAAACGAACGAAAG	TAATCAGCACCACTGCCTTG	AGGTAAGCAAGGCAGTGGTG	GGTTGGTAGTGCCTCCTGAA	1470	692	227	737	1671	2088
SUT087	5	+	11545	11929	3992	1791	CAGACTCATATCATACTATTTCGAATTCATTATACATCCTCAAAAGATGTCCACGAGGTCTCTCGGAGACGTAGAGAGCAATCCGTACGCTGCAGGTCGAC	TTCTCAAGTTACAGTATTAAAAAGGCAATATATATTTAGTTCTAACGGTGTCGGTCTCGTAGGAATGCACTGGCATCAGAGGATCGATGAATTCGAGCTCG	CGGAGACGTAGAGAGCAATC	tag_10291_st	GAATGCACTGGCATCAGAGG	tag_11780_st	TTATTGGCTTTGGGCATCTC	TGGCATTTTCCTGTTCTGGT	TCATGCACCAGAACAGGAAA	GCGCTGAATGTAAGCAAGGT	724	772	452	913	1151	2344
SUT098	5	+	504001	504945	219	447	TGGAGTGGCAAATTTTCTCATTCTCTTCATATAAACCACTAGGGAGATGTCCACGAGGTCTCTGACATACGTCAGAACTGATCCGTACGCTGCAGGTCGAC	ATTGAAAAGAAGGAAAGGAAAAAAAGTAAAATTATATAACGAGAGCGGTGTCGGTCTCGTAGGTATGACATGGCATCTCAGGATCGATGAATTCGAGCTCG	GACATACGTCAGAACTGATC	tag_10360_st	GTATGACATGGCATCTCAGG	tag_11770_st	AATACCAATTATCCCGCTCCTT	CTATGCCACCCGTGTTTCTC	ATGTTTTCCTCAGCCCATCA	CGCCTCAGCCCATATAGTTC	390	398	897	1129	1553	2186
SUT107	6	+	256457	257401	1408	6803	AGAATGAACTAGATATACAGTAATATACTAAATTGTCAGCTCTCGGATGTCCACGAGGTCTCTGACGACAGTTAGAGAAGATCCGTACGCTGCAGGTCGAC	ATAAACTCTAACATTATTTCTGGCCCATTCTTGAGTACTTATTTCCGGTGTCGGTCTCGTAGGTTCCAGGACACCATTCAGGATCGATGAATTCGAGCTCG	GACGACAGTTAGAGAAGATC	tag_10345_st	GTTCCAGGACACCATTCAGG	tag_11775_st	AGGCTTCGTGGGGTAAAAGT	GTAGCCGTCACACCAGGATT	AAAACTTAGACGCCCGATGA	CCCGCCTAATCCGTTCTAAT	726	825	918	833	1684	2317
SUT119	7	+	433507	435067	445	558	GAGCTCGAACAAGTATGCTAGCAACTAAACAAGCCGGCCTACGCC GATGTCCACGAGGTCTCT GAGTCTCATCACCTTCAAGT CGTACGCTGCAGGTCGAC	AAAGGATTATTGATGTTCCGAATAATTCAATTCACTATATAACAG CGGTGTCGGTCTCGTAG GTCACCTTATACCACGAAGT ATCGATGAATTCGAGCTCG	GAGTCTCATCACCTTCAAGT	tag_14010_st	GTCACCTTATACCACGAAGT	tag_14011_st	AGCAACTAAACAAGCCGGCC	GCACGTTTCCTTCGCGCCGG	TCTCGAAGTCTACCACGGCG	GCAAGATGGATGATAACAAG	407	357	222	1040	1662	1772
SUT123	7	+	622051	622283	252	2503	TAAAAAAAGGTACCGCATACATTCGAACCATTACCAGAAAAAAGAGATGTCCACGAGGTCTCTGATCAAACAGAGTGGCAATCCGTACGCTGCAGGTCGAC	TAATACAACCACAAACGATATACATAAATCTACATAATAATTTTACGGTGTCGGTCTCGTAGTAGACTCACTAACACTCAGGATCGATGAATTCGAGCTCG	GATCAAACAGAGTGGCAATC	tag_10292_st	TAGACTCACTAACACTCAGG	tag_11768_st	TGGTCCCTTCCTCGTAAACA	CTTTCGCGTTTACCTGTGCT	CAGCGGAATAAGCACACAAA	GTCCCACCCCAGGTAAACA	547	723	244	808	845	2190
SUT125	7	+	650859	651163	242	1818	GAGGGGGAATCCCGTCTTTCGTCCGTCGGAGCCAAAGAGATGAGCGATGTCCACGAGGTCTCTGCCGTTACCAGAGTTTAATCCGTACGCTGCAGGTCGAC	ATAAATACATCGGTTCAAATTATACTAAATCTAAATACTACGTTACGGTGTCGGTCTCGTAGTAGTCTACACCATCCGCAGGATCGATGAATTCGAGCTCG	GCCGTTACCAGAGTTTAATC	tag_10315_st	TAGTCTACACCATCCGCAGG	tag_11765_st	GACGGGAAACAAGGAAGGA	GGTGGGGAGAGACTGTTGTT	CGTGGCTGAACAACAGTCTC	GGAGATTGACCCCAACAAGA	301	398	660	1150	934	2207
SUT126	7	+	660091	661403	3131	346	CGTTGTGTCTACTATTAACACTAAGTTGTTGATCAAAACATTCCCGATGTCCACGAGGTCTCTGCTACAAACAAAAGTGCGGCCGTACGCTGCAGGTCGAC	AGGAAGGATAGTTTGAACTATATTATAAATTTATAACCAAAATCACGGTGTCGGTCTCGTAGTATACGACGCAAGACGCAGGATCGATGAATTCGAGCTCG	GCTACAAACAAAAGTGCGGC	tag_10147_st	TATACGACGCAAGACGCAGG	tag_11763_st	AATTGAACGCGAGAAACGAG	TCCACAGCAGCATCAAAATC	GATTTTGATGCTGCTGTGGA	ACAAGTGCAACGCTCTACCA	1570	853	697	1001	2248	2513
SUT129	7	+	738427	738883	224	239	ATACATACAATGATTGAAAAAATATTTTCATAAAGAAGAAAATGAGATGTCCACGAGGTCTCTGGAGCTACTTTACTCACTTCCGTACGCTGCAGGTCGAC	AGGAAATAAGAGTGCTACAAAAAATGACGATTACTTCTTTTTTCGCGGTGTCGGTCTCGTAGTATGACGCTCCATACGCAGGATCGATGAATTCGAGCTCG	GGAGCTACTTTACTCACTTC	tag_10600_st	TATGACGCTCCATACGCAGG	tag_11764_st	GCTGTTTTCGCCAATTTTCT	GCCCGCCATGTTGTATTTT	ATGGCGGGCGTAAAATAAA	ATCGCAATGTGGAGTTAGCC	397	440	706	1117	1095	2216
SUT131	7	+	778171	778619	2978	997	CTTCTTTCCCATCTGACTCCGTTTTATAAACAGGGGTTCTTTAAGGATGTCCACGAGGTCTCTGGAGGTCACTTAGCACTCTCCGTACGCTGCAGGTCGAC	ATAATGTCTATATCCAACAGTGTTCTTGTAGGGTATAGGAATCCACGGTGTCGGTCTCGTAGTCAGGTTACACATTCTCAGGATCGATGAATTCGAGCTCG	GGAGGTCACTTAGCACTCTC	tag_10456_st	TCAGGTTACACATTCTCAGG	tag_11772_st	ATTGATTTTTCGCAGCAAGG	ATTCGTTCCGGTTGGATCTT	TAAGATCCAACCGGAACGAA	GCTTGCATTTCAGCTTCCTC	495	433	405	917	880	2009
SUT135	7	+	856683	857035	382	456	GGAACGGACGTCGTCTACCGATTACAGTAAGCAAAGAGGATGGTGGATGTCCACGAGGTCTCTGTACATACGGTCTAACCTTCCGTACGCTGCAGGTCGAC	ATTTCGCTTCCAGAGTGGTTGCCATGGCAAACTATTCAACCCGCTCGGTGTCGGTCTCGTAGTCATCATTCGCGACAGCAGGATCGATGAATTCGAGCTCG	GTACATACGGTCTAACCTTC	tag_10604_st	TCATCATTCGCGACAGCAGG	tag_11758_st	CGAATCTACGGCTGTTTTCC	GCCTACCTTCGTTTCCCTTT	AACTTGCACTGTCCGGTTTC	AGATAAGGCAACGAGGACCA	710	784	368	753	971	2196
SUT142	7	+	994314	994954	793	685	TTCCTACCATGAAGTAGTTGGATCTTGAAATGGGTTGGGCCGGAAGATGTCCACGAGGTCTCTTACGAGTACAGAGGTATGGCCGTACGCTGCAGGTCGAC	TGTGGCTGCGTATCATATATGTATATGTATATATACAATTATATTCGGTGTCGGTCTCGTAGTCGCATACTACATAGAGAGGATCGATGAATTCGAGCTCG	TACGAGTACAGAGGTATGGC	tag_10171_st	TCGCATACTACATAGAGAGG	tag_11782_st	ATGTTAGCCGGGAAAAGACA	GCGGAAGAAACAAAAGAACG	AATAGCCGCCCTTCTTCTTC	GGCCACTACGGTTACTTCCA	325	528	735	1127	1377	2314
SUT157/579	8	+	201626	203522	316	1085	AAAACAGCGTTTGCTGAGAAAAAAAATAAATCATCGAGAAGAAGT GATGTCCACGAGGTCTCT GAGTCCAGTAGCCGCGTTAT CGTACGCTGCAGGTCGAC	ATGTACGAGATTTTGAAACCATGAGGGATGTGCCCTCAAACTTTA CGGTGTCGGTCTCGTAG AGCAGTTATGGAGTAGCTCT ATCGATGAATTCGAGCTCG	GAGTCCAGTAGCCGCGTTAT	tag_13383_st	AGCAGTTATGGAGTAGCTCT	tag_13911_st	CAATTTGGCTTGCTTGAACA	CACCTTACAATGGGAACATCC	GGCTCAACGAAGAGGGCTAT	TTGAAACCATGAGGGATGTG	330	597	260	654	2228	1909
SUT167	8	+	364369	365009	216	2883	TTGGAAATGAACTTTTTCTTGAAAAGATTAATACAAACGGAAAAA GATGTCCACGAGGTCTCT ACGAGTAGCTCAGACGTTAT CGTACGCTGCAGGTCGAC	ATGTTAAAGCATTTCCGATTGGCATCATTGATGTATATGTACGTA CGGTGTCGGTCTCGTAG GAGGATACGCATCCAGCTCT ATCGATGAATTCGAGCTCG	ACGAGTAGCTCAGACGTTAT	tag_13382_st	GAGGATACGCATCCAGCTCT	tag_13910_st	TGGTCCATTGGCTAACTTTCTT	TGACGGTGAGTTTCCTATTGC	ACTGTCTTAGTTCGCAACCATTT	TGCACTTGAGTTTCTTTTCAACA	250	522	286	806	1049	1986
SUT170	8	+	392250	392514	1950	769	CATCTTTGTTTTAAATGGGCTCTCTACAACAAAACATGAAAAGTAGATGTCCACGAGGTCTCTTATAATCTTGCCGAACGGGCCGTACGCTGCAGGTCGAC	ATACCTTGTAAATATCCTATGAAAATAACTTAAATGAAATTTATACGGTGTCGGTCTCGTAGTCTGAGCATAAAGTAGCAGGATCGATGAATTCGAGCTCG	TATAATCTTGCCGAACGGGC	tag_10156_st	TCTGAGCATAAAGTAGCAGG	tag_11761_st	TTCTCCCCTCTGATGCCTAA	CGCAATAAGTAAGGCCACAGA	TGCGTTCATATTCCGTGAAA	TTACTGAGGGGCATCTTGCT	383	521	537	1050	917	2230
SUT171	8	+	429540	429714	362	7234	TTTCTATATGAAGGACATAATGGAATGGGAGTGACAACGGACCATGATGTCCACGAGGTCTCTTATAGGCATAGAGTAGGCTCCGTACGCTGCAGGTCGAC	AATTGGCGGGGGACGAAGAGTTAGAGGCCGAACAAATCGATGTATCGGTGTCGGTCTCGTAGTGTGTAGCACACTCACCAGGATCGATGAATTCGAGCTCG	TATAGGCATAGAGTAGGCTC	tag_10442_st	TGTGTAGCACACTCACCAGG	tag_11750_st	CCTCTGTCTTCTTCGCAGGT	TTTTTATGCCCGTCGTAGTTG	TCATAGTGCGGAAAGCGTAG	GCCTTGAACTACTCGGTTGG	515	638	657	1101	1085	2398
SUT174	8	+	522204	522596	467	2796	AAGGATGTTGGACAACGCGAATTTTGGAAGTGACTTCTCATAAGCGATGTCCACGAGGTCTCTTATTGTTGCAGACGCGGCTCCGTACGCTGCAGGTCGAC	AATTATCGATATTACATTGAAACCTATGAGGAAGATTATGACATGCGGTGTCGGTCTCGTAGTTGTCACGCAACTCCAGAGGATCGATGAATTCGAGCTCG	TATTGTTGCAGACGCGGCTC	tag_10443_st	TTGTCACGCAACTCCAGAGG	tag_11779_st	AGCATCCAAGGTGTTTACGC	GCTCAGAACAGATTCCCCTTT	GAATGCAAAACGCAGAAATG	TGGTAGCGCACACTTCAAAC	691	664	827	1167	1305	2490
SUT193	9	+	387001	388449	1303	5226	ACTTTCTTCGTCCATTACGTAGACCTAACGTTGAAAAGGAGACCTGATGTCCACGAGGTCTCTTCCATACTGGACGAAGTGGCCGTACGCTGCAGGTCGAC	TTCTGAGAATGAACAGAAAAAAGGATGCGGCAAGATCCGGTAAGACGGTGTCGGTCTCGTAGTTTAAGTCCAGTGACCCAGGATCGATGAATTCGAGCTCG	TCCATACTGGACGAAGTGGC	tag_10174_st	TTTAAGTCCAGTGACCCAGG	tag_11755_st	GCGCTGACGTAGTTTAGAAGG	ACCGCGTAAATCAAATGAGG	ACGGCATAACGATCCATTTC	GGCACCTTTGCTCTTTGAAC	998	652	1076	1211	2393	2522
SUT211	10	+	415136	415384	857	4172	ACCTTGCAGCGAAGCTTTCTTTTGTATTTCATCTCATAGAAGGTGGATGTCCACGAGGTCTCTTGCCATTCGGTACTAGGCTCCGTACGCTGCAGGTCGAC	TGTACACAACTATGAGCAATCCATTACATTAAAAGGGTTTACTGTCGGTGTCGGTCTCGTAGTTTCTGACACCGTGACCAGGATCGATGAATTCGAGCTCG	TGCCATTCGGTACTAGGCTC	tag_10441_st	TTTCTGACACCGTGACCAGG	tag_11752_st	TTTTTCAGTGGTGGGTGTTG	TGGTCCTCCCAATCATTTTG	TGTAGTTCGTGGAGAACCAGAC	TTTGGCGCTGACACTAACC	550	631	376	784	745	2074
SUT218/655	11	+	18569	19681	230	2553	TTACTAATTAGTCATTTTTTTCAGTTTTTTTGTCATAGAAGCCAC GATGTCCACGAGGTCTCT TAGTCATTGGCCACTGAAGT CGTACGCTGCAGGTCGAC	AAAAATAAAAAACATAGTAACATATTTTAAAAGAGACCTTTTATT CGGTGTCGGTCTCGTAG CACGACCTGAAGCCATAAGT ATCGATGAATTCGAGCTCG	TAGTCATTGGCCACTGAAGT	tag_14016_st	CACGACCTGAAGCCATAAGT	tag_14017_st	AAGTCAGCCAAGTTACCTGT	CTATGCCTCATAAAGCTTGA	CGGCGGATTGTTGTATATTG	GGACAGTGCCCGAATTCTCG	305	523	191	1011	1053	1871
SUT219/656	11	+	19681	21145	1342	1089	TTCGTCATTTCAATGTTATAATCATTTTTATCGCCAAATTTTCTT GATGTCCACGAGGTCTCT CACCGCGAGTACTACTAAGT CGTACGCTGCAGGTCGAC	AATTATAGATCCATTTATATATTAATTAACATCCGAAACAAAAGG CGGTGTCGGTCTCGTAG AAATGCTCAGAGCCGTAAGT ATCGATGAATTCGAGCTCG	CACCGCGAGTACTACTAAGT	tag_14018_st	AAATGCTCAGAGCCGTAAGT	tag_14019_st	ATTCGGGCACTGTCCTTTTC	CGGCTCCTCATGTGGATAGT	CAGCATGCATGACCCGGGGG	CATACTGTGCGTTTATACCT	207	397	316	1033	1600	1767
SUT229/661	11	-	150860	153133	448	350	TTCCGTTTTCAGAATTTTTACAATTTGTCACCGAAATAGCAGTTTGATGTCCACGAGGTCTCTCAACCTGATGACATGGCTCTCGTACGCTGCAGGTCGAC	TTGTTTCTTCCAAAAAAAGACAGTAACCATCTGAAAAGAACGTCACGGTGTCGGTCTCGTAGGCAGCAGCGTCTACGATTCTATCGATGAATTCGAGCTCG	CAACCTGATGACATGGCTCT	tag_13914_st	GCAGCAGCGTCTACGATTCT	tag_13968_st	TTGGACCAGTCTCTTGGTAGG	TTAACGCTCTTCAGGCACTTC	AAGTGCCTGAAGAGCGTTAAGT	CAAAATCGGTGGGAGAGATG	382	756	299	936	3383	2344
SUT233/CUT707	11	+	229966	231479	422	1249	CACCTGTTCA TCAAGTATTC TTCATTTCTT TTTCCATCGC GATGAGATGTCCACGAGGTCTCTCGCTACGGATGGAGTAAACTCGTACGCTGCAGGTCGAC	GTTTCTCTGAACGCCGGGGTAGTGGTCCAAAGCCCACGAAACGCGCGGTGTCGGTCTCGTAGCCTATATGCATAGGTGGGAAATCGATGAATTCGAGCTCG	CGCTACGGATGGAGTAAACT	tag_13399_st	CCTATATGCATAGGTGGGAA	tag_14_st	GGTTGCATCGATCTTGGACT	TTTGCCGTTTTGTCATCGT	TGTGCGAAAGGAATGACATAA	CAGTGCTGCCTCTCTTGGTA	244	600	300	1133	2623	2478
SUT234	11	+	321955	322451	1296	421	TTTTTAGCGTTCATTTGAACGAATGGCTAACGCTAAACGGAGAAGGATGTCCACGAGGTCTCTAAAGCGCCATACTCCTAAGGCGTACGCTGCAGGTCGAC	GAACGGATCTTCGGGCTTTTTTTGCCGCGCTCAAAATGCCCCGGACGGTGTCGGTCTCGTAGAAAGTTCCAGCCACTAGAGGATCGATGAATTCGAGCTCG	AAAGCGCCATACTCCTAAGG	tag_11727_st	AAAGTTCCAGCCACTAGAGG	tag_11786_st	AGTCAGATAACCGCCCCTTC	ACCCCTTCCCCTTTTCTTTT	AGGGGAGGGGAAAAGAAAAG	GTGAAACCTCGTGGGAGAAA	933	826	408	908	1312	2393
SUT239/679	11	+	513735	514393	979	357	GCATTTCAGC TTTCATTAGA TTGATGACTA TTTTTCAACC TTATGGATGTCCACGAGGTCTCTGACTTAGGTCGAGATTCTCTCGTACGCTGCAGGTCGAC	CGGAACTCATGCTGCCCCTATTCTCCTTTGTGTCTGGTGTCAGGTCGGTGTCGGTCTCGTAGGGCTATGATTGACGAGTTCTATCGATGAATTCGAGCTCG	GACTTAGGTCGAGATTCTCT	tag_13921_st	GGCTATGATTGACGAGTTCT	tag_13987_st	CATTATCTTGACAAATGGGTGAAT	ACGCCCGCAAGAGTCTACTA	ACCTCGCTCTGGGTCAAGTA	CCTTGGCACTGGTGTGTCTA	358	767	389	990	1768	2471
SUT249	12	+	222321	222617	188	1537	AAAAAGGCTATTTACCGCTTTATGGGAAGATCATGGCAAGTCAAAGATGTCCACGAGGTCTCTAAAGGCAATCACCCGGAAGGCGTACGCTGCAGGTCGAC	TTTAGCACTGGATTGCTTTACGAACGGATAAAAATAATTATGATTCGGTGTCGGTCTCGTAGAATTCCCACGCATACCGAGGATCGATGAATTCGAGCTCG	AAAGGCAATCACCCGGAAGG	tag_11711_st	AATTCCCACGCATACCGAGG	tag_11789_st	TTGGCTTTCTGTCGCACTAA	ATACGATTCCAGTTGAGACACG	AAATGCGAGAACAAAACTTGAAT	CCCCAGCCACCACTACTTTA	348	521	516	1002	901	2182
SUT264	12	+	449689	450729	1706	3968	CGCTTGTTTAAAAAATACTTTCCCGATATATATATATAGTCTCCCGATGTCCACGAGGTCTCTAACACCCACTATAGTCAAGGCGTACGCTGCAGGTCGAC	TGGTTATATATACCTGCGAAGAATATGAACAAATCATATTGAGTACGGTGTCGGTCTCGTAGACAGCGGTTTTACTTCGAGGATCGATGAATTCGAGCTCG	AACACCCACTATAGTCAAGG	tag_11704_st	ACAGCGGTTTTACTTCGAGG	tag_11795_st	TGCGCGATAACTCTCCTACC	GTCTCAGCGGGTCGTTTATG	CCGGGAAAAGCTCTACAAATC	TGCAACAGCAATGGAACAAG	643	495	1118	857	1474	2011
SUT274/698	12	-	603384	603906	964	781	TGCTTTTTTC TGAAATATAT TCGTTGCATA GACACGGTAT GCATAGATGTCCACGAGGTCTCTCCTCTTTGGACATGTGGCCTCGTACGCTGCAGGTCGAC	ACATTTAGGCCTAGCTATATATGCTACTATGTATCATTCAGTGAACGGTGTCGGTCTCGTAGCGGATACTGTTCTCGATTCTATCGATGAATTCGAGCTCG	CCTCTTTGGACATGTGGCCT	tag_13651_st	CGGATACTGTTCTCGATTCT	tag_13970_st	TTCGCTTTGCTCAGAGTTGA	CGCCCGTAAAGGGTTTAAGT	TCTGTAGAGGTGCCGAACAA	TTCACGCAGCGATCTAAAAA	300	582	334	1067	1632	1902
SUT284/712	12	+	1030035	1030645	1230	230	TCAGGTCATC GCCGTTCTGG GCCACTAGGC TATATCTATT CATTTGATGTCCACGAGGTCTCTTACTCGCGGACGACTTCTCTCGTACGCTGCAGGTCGAC	GTTCATATGGGTTAATGATTGTATGAGAATGTCTGACGAAGAATACGGTGTCGGTCTCGTAGGCACTGGCTACACTCGTTCTATCGATGAATTCGAGCTCG	TACTCGCGGACGACTTCTCT	tag_13922_st	GCACTGGCTACACTCGTTCT	tag_13989_st	ACTGTTTGACAATAACGGAAAGG	ACCATGCAGCTTCCAATGTA	AACCTGCCAGCGATAATGTT	CGTAAATACAGAAAAAGGCAACAG	248	724	281	789	1720	2275
SUT285	13	+	13521	14065	346	689	GAACAGTCTTCTCTTTGTGTATGTCTTGTACCATTGTCTGTGGTAGATGTCCACGAGGTCTCTAACCAGCCTTCTAACTTTCGCGTACGCTGCAGGTCGAC	CTGAAAAATACATCGCAATGAAGTCACTTTCGTGATGGAAAGAACCGGTGTCGGTCTCGTAGACCTATACCGGAGTGAGAGGATCGATGAATTCGAGCTCG	AACCAGCCTTCTAACTTTCG	tag_11699_st	ACCTATACCGGAGTGAGAGG	tag_11785_st	GCAATGGCGGTTCTTAATCT	TGGTTTGCCCATCCTACATT	AATGTAGGATGGGCAAACCA	ACTGCCACTGAGGTTTGAGG	588	666	559	836	1128	2161
SUT304/730	13	-	465208	465714	199	630	GCCGTTTGAACCATCATAAACTTATGGAAGCCATCTAAATAATTTGATGTCCACGAGGTCTCTGCGACTGAGTACCATGCTCTCGTACGCTGCAGGTCGAC	TATAATTAGG CATATAAAAC TACATGGTTA TGAAAGGCGC TGGCACGGTGTCGGTCTCGTAGGCAGCCGTACGGATGATTCTATCGATGAATTCGAGCTCG	GCGACTGAGTACCATGCTCT	tag_13915_st	GCAGCCGTACGGATGATTCT	tag_13971_st	GCTGCTCTAGGTCTTTCGTTTG	GAAAGGAACCAGGAAAAAGGA	TTCTCTTTCCGTGGGCTTC	GCTGGCAGTAAAAGGGTTGT	248	844	265	1100	1616	2341
SUT305	13	+	480873	481209	684	1804	CAACAAAAATATTTATTTTAAAATTAAACTGGTTCAAGGTCTCATGATGTCCACGAGGTCTCTAATACCATCGAGTGGAAAGGCGTACGCTGCAGGTCGAC	ATGGAGTCCCAACAATTATTACAATATTCACTTATTTCTCACATCCGGTGTCGGTCTCGTAGATATCGAGTAGCACCCGAGGATCGATGAATTCGAGCTCG	AATACCATCGAGTGGAAAGG	tag_11701_st	ATATCGAGTAGCACCCGAGG	tag_11790_st	TGTTTTTAACGCCCTCCAAC	GAATGATGAACTCCGCCTGT	CAAAGCAACCCACAAATCCT	TCCGATAGCCGTTTCTCAAT	545	712	783	1089	1219	2460
SUT329	14	+	355779	356387	735	1068	TGTGTCAAATGAGGATAAATCTCAAACACCCATGTACCGAAAATCGATGTCCACGAGGTCTCTACAATCAATGCCCGGTAAGGCGTACGCTGCAGGTCGAC	CGTACATAATTTCGCAAAAAAGAAAAAAATATTTACTGCTATAAACGGTGTCGGTCTCGTAGATCCTGACACCACTGAGAGGATCGATGAATTCGAGCTCG	ACAATCAATGCCCGGTAAGG	tag_11733_st	ATCCTGACACCACTGAGAGG	tag_11784_st	AAGGTCTCTGGGTGTTGCTG	GAGTCGCATGGTCAGTCAAA	GGAGCCGTGTAGCTTAGTGTG	TCCCTCGTTATGGCTCATTC	276	498	536	833	1021	1990
SUT346	14	+	764324	764740	1732	635	CATATAAAGTTCTTGGACAAGATTGGATACATTTAGTTTTATTTTGATGTCCACGAGGTCTCTACCATATAGCATGAGGAAGGCGTACGCTGCAGGTCGAC	GATGTTTTACCAGGTGAGTCATATAAATATATATATATATATATCCGGTGTCGGTCTCGTAGTATTACCGTACCCCAGGAGGATCGATGAATTCGAGCTCG	ACCATATAGCATGAGGAAGG	tag_11710_st	TATTACCGTACCCCAGGAGG	tag_11797_st	ACCCACGCTTTTGCTATTTG	TTTGTTGTTCGGGTATTCCTCT	AGAGGAATACCCGAACAACAAA	GTCGGGAATAGGACACCTCA	613	623	700	1171	1292	2453
SUT347	15	+	8665	9065	2491	531	GTTTTCATCGACATTCCAGCTAATAGTGGAAAGATAGATTCACACGATGTCCACGAGGTCTCTACCATGCAGTCCTGATAAGGCGTACGCTGCAGGTCGAC	AACATAAATACGAAACAAAGTGTTTAGAGAGTGCTATATTAATTTCGGTGTCGGTCTCGTAGTGATCGCATCGCATTCGAGGATCGATGAATTCGAGCTCG	ACCATGCAGTCCTGATAAGG	tag_11721_st	TGATCGCATCGCATTCGAGG	tag_11794_st	TGTGGTTCGAGGTGTTATCGT	TTCCATCAGAGCCATTGTGA	TCACAATGGCTCTGATGGAA	GCAAGGCCACAAATAGGAAA	598	663	539	973	1118	2295
SUT348	15	+	15689	16401	185	1394	TGTCGGTAGGAAATTACGCGATCAATAAAATTCCTGTTGATGGGAGATGTCCACGAGGTCTCTACCGTCACAGACTTTACAAGCGTACGCTGCAGGTCGAC	AGCTGTAGCTAGCAATAAAAAAAAGATTCAAGATGTTCAGGGAGTCGGTGTCGGTCTCGTAGTTACCTATGCGAGAGCGAGGATCGATGAATTCGAGCTCG	ACCGTCACAGACTTTACAAG	tag_10712_st	TTACCTATGCGAGAGCGAGG	tag_11793_st	CAGCCACTGCCCTGATAAA	ACCTTTTCAGCAGCACACCT	TGGCAACAAATCAACGAAAA	AAAAGATGAGGATGGGCTGA	355	519	1110	1192	1505	2370
SUT349/CUT354	15	+	21820	22278	555	1908	CTAACTTTTT CACACCCCTT CATTAACTAA TTAAAACTGT CGTAGGATGTCCACGAGGTCTCTGAGGGCACCGATTACATCCTCGTACGCTGCAGGTCGAC	TAAGAACAAGTACTAGTGAAATTATATATTATTGTTTATGATCAACGGTGTCGGTCTCGTAGGCATCCGTTGGAGCGTTTCTATCGATGAATTCGAGCTCG	GAGGGCACCGATTACATCCT	tag_13664_st	GCATCCGTTGGAGCGTTTCT	tag_14003_st	TGCTCACTGAAAACCCTGTG	TGAGGATGGCTGAATAAAAATG	GCCTTCATTCGTCATTTCGT	GCCAGATAATACGGCGAGTT	280	785	392	1070	1568	2300
SUT355	15	+	96658	97058	297	493	CGGATCTCCTGAGTTTCTGACCTATAGAGCCCCAAAAAATGGGAT GATGTCCACGAGGTCTCT CGCGCTATGTAGTCTAAAGT CGTACGCTGCAGGTCGAC	ACGTTCTATTGTGCGATAGATGAAATTCTAGTCGCAGTAAAAGCG CGGTGTCGGTCTCGTAG GGGTCACCGTATCCTCAAGT ATCGATGAATTCGAGCTCG	CGCGCTATGTAGTCTAAAGT	tag_14008_st	GGGTCACCGTATCCTCAAGT	tag_14009_st	CAGGCGGATCTCCTGAGTTT	GTACCATTGGGAGGCCACTC	CGGGGGGTAGACAACTCAGC	CACTGTCACTGCTTTCGAGG	102	382	231	1087	548	1844
SUT361	15	+	348698	349018	1748	661	ACTTGGAATTCGCTCCCATTGCACCAATTTCAGGAAGCGATCAAAGATGTCCACGAGGTCTCTACGAGACTGAGATATTGGTCCGTACGCTGCAGGTCGAC	AGCTACAAATAAAATAACCTGTATGTACATATTACTCTATATGATCGGTGTCGGTCTCGTAGTTCTTGTAACACATGGGAGGATCGATGAATTCGAGCTCG	ACGAGACTGAGATATTGGTC	tag_1113_st	TTCTTGTAACACATGGGAGG	tag_11798_st	TTAAGCGGTGAAGGTCTGCT	GGCAACTATGAGGGCAGAAG	TGCCCTCAATAAACGAAAGG	AGCGCGTAAAAAGAAACGAG	453	544	342	846	792	2049
SUT362	15	+	385069	386415	694	455	TGAGATCACA TTCCACGTAG CCCTAAACAT TGGCGTACAT TTCCAGATGTCCACGAGGTCTCTATCTGAGGGTCCAGTTCTCTCGTACGCTGCAGGTCGAC	TTACAGGACAGAAATAAATGGGTTACACACCAGAAATCAGGGACACGGTGTCGGTCTCGTAGTTGCATCGGGGAGTCGTTCTATCGATGAATTCGAGCTCG	ATCTGAGGGTCCAGTTCTCT	tag_13923_st	TTGCATCGGGGAGTCGTTCT	tag_13990_st	CATTGCGTCAGAGCTTATCG	GAGGGGTCGAGAAAAGGTTC	GCAGGGGACTTTTCAGGATA	CATTGCGAAAGGCACCATA	280	574	294	1004	2456	2405
SUT385	15	+	968022	968520	445	2348	CTACGCATTC ATGAAAATTT TTCAACTTTT TCTTTTGACC GTGGTGATGTCCACGAGGTCTCTGTAGACCGGAAGCAGTTTATCGTACGCTGCAGGTCGAC	TGATATTCCCATTAGGATGCTCTGAGGCTGCTAACATCTCGTAGCCGGTGTCGGTCTCGTAGTAACTTGCGGCCACGGTTCTATCGATGAATTCGAGCTCG	GTAGACCGGAAGCAGTTTAT	tag_13396_st	TAACTTGCGGCCACGGTTCT	tag_13991_st	CCATGCAATGAGATAAGGAAGA	CGGGTTTTCTCCCCATAAAC	GCAGGTACTGAGGCTTGGAT	ATCTCGTAGCGATGGAGCAT	297	557	250	1006	1608	2350
SUT388	15	+	1003910	1004512	733	667	TTAATATTCT TGTTCCTTAC TCTTGATCAT ACGTAGAATG TATGTGATGTCCACGAGGTCTCTTAATTCGGGCCCACTTGCCTCGTACGCTGCAGGTCGAC	AAGCCAAGCGAGAACAGAAAAAAAAAATGAAGTAAAATATTGGACCGGTGTCGGTCTCGTAGATATTACACGCCCCGGTTCTATCGATGAATTCGAGCTCG	TAATTCGGGCCCACTTGCCT	tag_13660_st	ATATTACACGCCCCGGTTCT	tag_13992_st	CGATTTGGACCGTTTGACTT	CCATAATCCCTTGCGTGAGT	TTAACTGCTTCCAACGCTCTATAC	CTTCTCATCGCATGGGTTTT	350	579	263	954	1712	2441
SUT398	16	+	286625	287009	565	2024	TGAAATGATATACTTTATGGATAGACATTATCTGTTCATTGAGTAGATGTCCACGAGGTCTCTAGCGACGTTTCTAACCTTCGCGTACGCTGCAGGTCGAC	CTGGAGCTATAAATACAATAAGCGTTTTGTACGTAGAAAATATCCCGGTGTCGGTCTCGTAGACCCACGGCTATGAATGAGGATCGATGAATTCGAGCTCG	AGCGACGTTTCTAACCTTCG	tag_11682_st	ACCCACGGCTATGAATGAGG	tag_11802_st	GGCTCGCCTTTCTTGTATTG	GCTGTCTCTTGACCGTTTTTG	CTGAAGAGGCTACGCTTGCT	ATGCTGGGAAAAGGAAAAGG	776	796	819	1156	1418	2611
SUT413	16	+	511843	512267	744	1909	TACCACCAAATAAATGATAACCACAATTTACTTTACTTATCCTCCGATGTCCACGAGGTCTCTAGCGACTATAGCGTACTTCGCGTACGCTGCAGGTCGAC	TTATTCTTTTATAATATACAATTATTATACATAAGTAGAAATATTCGGTGTCGGTCTCGTAGACCTTCGAGACATGTATAGGATCGATGAATTCGAGCTCG	AGCGACTATAGCGTACTTCG	tag_11681_st	ACCTTCGAGACATGTATAGG	tag_11823_st	TACCAGCCCCATCTTTTTCA	AGATGAGCAGGCAGAACCAC	GTGGTTCTGCCTGCTCATCT	CGGAGGTGGATGAAGAGAAA	781	765	580	1071	1342	2495
SUT417	16	+	586422	588952	885	1373	CATTTCCATT TGCTCTGACA TTGCGGCTAT GCATCACAGG CAAAAGATGTCCACGAGGTCTCTTCAGGGAGTAGAGGTTCTCTCGTACGCTGCAGGTCGAC	AAATTTTACTTCTAGACCACGCATTTAACAATAATGTTTGCCCGCCGGTGTCGGTCTCGTAGGACCGTCGTAACAGGGTTCTATCGATGAATTCGAGCTCG	TCAGGGAGTAGAGGTTCTCT	tag_13924_st	GACCGTCGTAACAGGGTTCT	tag_13993_st	ACGGCATCTCTCACCTGATT	TGTGCAGTAAACCGATACGC	TTCCTACGGAGACAAGAACCA	TGTCGCTATTTTGACTTACCTCAG	267	656	298	1032	3640	2253
SUT418	16	+	588950	589872	3413	1196	TTTTCTGCAT AGTTCACTGT TATGTAAATT TTGAACTTGA AATCTGATGTCCACGAGGTCTCTGAGTCGTCATGAGCGTTTATCGTACGCTGCAGGTCGAC	AAAGAACAAACAGCCTCTTTCCTCTACAAAAGTATGTTAAATGTACGGTGTCGGTCTCGTAGGGACGATTTCCACGTGTTCTATCGATGAATTCGAGCTCG	GAGTCGTCATGAGCGTTTAT	tag_13397_st	GGACGATTTCCACGTGTTCT	tag_13994_st	CTGCTAGTGGCACGTTGTTG	GGTCAGCAATGTTTCCAAGG	AATGAGACCGTTCCCTTGTG	ACTTTCCCGCTGAATTTCCT	270	881	272	948	2032	2356
SUT420/CUT425	16	+	607502	608688	238	1385	TCTAATTACT TAGAATCTTT AAAAGTCTTA CTGTAATTCG ATCAGGATGTCCACGAGGTCTCTTCACGACCTTAATGCAGTCTCGTACGCTGCAGGTCGAC	GCAAGGTTCTTAGGGTAATGGCAGCTCTGAAAGGGGCTTGTCGAGCGGTGTCGGTCTCGTAGCTTACTGGGACACGGTTTCTATCGATGAATTCGAGCTCG	TCACGACCTTAATGCAGTCT	tag_13928_st	CTTACTGGGACACGGTTTCT	tag_14004_st	ACTCTTTGCCGTGCATTTTT	ACATGTGCGCTTTCCTTCTC	TTCAAGACCGATGACATAACTT	CCATTATTTTCGGGGATTGT	272	564	248	972	2296	2350
SUT430	16	+	928662	931160	1774	257	TCTTTATTTT CTTTCGTTAG TGAAAAATAT GAATTGAAGG ATCAGGATGTCCACGAGGTCTCTAGAGTTACGTCCAGTTGCCTCGTACGCTGCAGGTCGAC	GACGACTTTTAATTGCCGCATCGCAAGTATGTATCGCGGTGTCATCGGTGTCGGTCTCGTAGAAAGCCGGTTCCATTGTTCTATCGATGAATTCGAGCTCG	AGAGTTACGTCCAGTTGCCT	tag_13661_st	AAAGCCGGTTCCATTGTTCT	tag_13995_st	CGTGGGGCTCTTTCATTATC	TTGTATTCCGTGCTGTGGAA	CGACCCATAATTTTCGATGC	TCTTACCTTGCTTTCCTTATTCGT	376	758	316	1007	3608	2200
SUT431	16	+	937283	937955	3253	1073	AGTAATTAAAAATTTCTTAACTTCTTTTCGATCAATTACAATATAGATGTCCACGAGGTCTCTAGCTCGACACCTATATCACGCGTACGCTGCAGGTCGAC	ATTTTATTGGAAAAAGTATTAATTTATCGTCTATCGACTAGTATTCGGTGTCGGTCTCGTAGAGTCATATCCGACCTGGAGGATCGATGAATTCGAGCTCG	AGCTCGACACCTATATCACG	tag_11250_st	AGTCATATCCGACCTGGAGG	tag_11799_st	TACGCTGGACCCATTGACTT	TGACCAATGCTGAATGCTTG	TCATAATCGGGAACAATGAAAA	TGGTGATTAGGCAGGGTTTC	966	793	721	1046	1593	2498
SUT432	1	-	5076	6237	2595	2779	AAAGCAAAATGATAATTACGAATTGCTTCTAAAATAAATATGAAGGATGTCCACGAGGTCTCTAGGGATGTCCAACACCTTCGCGTACGCTGCAGGTCGAC	CTGACAGGATGGAATAGATATTAAATATACATTTTGCATTTTTTTCGGTGTCGGTCTCGTAGATCACTCAGGGACTTGGAGGATCGATGAATTCGAGCTCG	AGGGATGTCCAACACCTTCG	tag_11683_st	ATCACTCAGGGACTTGGAGG	tag_11800_st	CATGGCTGAACCTAACCAATC	TGATATTCGGGTTTGAGCTTG	TCCCTGCGTCAAAAATAAGG	CCGACCTTACCGAGAAATGA	430	519	769	888	1650	2066
SUT463	4	-	411397	411565	949	257	GAACCCATTCTGATACTTGTTGTGCGGAAAAAGGGACAAAATAGGGATGTCCACGAGGTCTCTATCGACCAGTAGCAGACAGGCGTACGCTGCAGGTCGAC	ACAGGGTCAATGAGACTGTTGTCCTCCTACTGTCCCTATGTCTCTCGGTGTCGGTCTCGTAGCCCAGATATACAGCGATAGGATCGATGAATTCGAGCTCG	ATCGACCAGTAGCAGACAGG	tag_11744_st	CCCAGATATACAGCGATAGG	tag_11820_st	ACCCCAGTTACCAGATCCAA	CTTGCTTCTCTCCCCTTCCT	AGGAAGGGGAGAGAAGCAAG	ACAAACGCAACACGAAAGAA	434	694	243	714	658	2067
SUT465	4	-	443805	444197	779	483	TCCAGTCTACAGGGATCTTTTTCTTTACAAACTCTTATTCGCATAGATGTCCACGAGGTCTCTATCTAAGCTCCACTCAGGTGCGTACGCTGCAGGTCGAC	ATAGTCCTAGAAAGTAATACTTTTTACAACTGTTTCTTTAAATCCCGGTGTCGGTCTCGTAGCCTTTACAGACATTTGGAGGATCGATGAATTCGAGCTCG	ATCTAAGCTCCACTCAGGTG	tag_1070_st	CCTTTACAGACATTTGGAGG	tag_11801_st	CGTGACAATGGGAAAAAGGT	TTTCACTTCCCTAAGTCCTTCCT	GCAACAGTGCCCGAAGTAA	TGAGGGGAAGAAGTCTACGTTT	729	679	384	887	1040	2225
SUT469	4	-	544983	545967	1616	673	TGCGGGCTTGATGATAAAATGTATTGTTGAAAAGATCGCGAATGCGATGTCCACGAGGTCTCTATGCAAGAAAGATCCCTTCGCGTACGCTGCAGGTCGAC	TATCGGCAGCTCGAAGCGTTTTTATGAACTGTAAAAATATGTCCTCGGTGTCGGTCTCGTAGCGGCGATATACATTCATAGGATCGATGAATTCGAGCTCG	ATGCAAGAAAGATCCCTTCG	tag_11684_st	CGGCGATATACATTCATAGG	tag_11819_st	GAGCGTTATTGGTGGGAGAA	TGCAAAACATGCGTCTAACC	GCCGTAAATGCGAGTGTTCT	AGATTTTGTGCCGGATTGTC	690	718	948	1169	1953	2546
SUT471	4	-	593223	593495	787	395	TATGGCACCAAATTTTTTCTTTTACAAGTTCCTTACGTAGAGAACGATGTCCACGAGGTCTCTATGTGACCACCCAGCATGTCCGTACGCTGCAGGTCGAC	AGTATTTTAAAATCTATGACATCAGATGTAGTTATCTTACTGCCACGGTGTCGGTCTCGTAGTACCCGTCAGGAGTCATAGGATCGATGAATTCGAGCTCG	ATGTGACCACCCAGCATGTC	tag_1115_st	TACCCGTCAGGAGTCATAGG	tag_11818_st	GAATTGTCTTGGGCAGTGGT	CTCCCCTCCTTCTCTTCTGG	AGAAGGAGGGGAGGGAAAAG	TCAGCGAAACCACTGATCCT	517	720	578	1009	1083	2388
SUT473/CUT502	4	-	621019	621693	770	461	TAATTTTTGAGAATAATATATTACTGTGTTTTTCGAAACGAAAGTGATGTCCACGAGGTCTCTACTAGCTGAGAGCAGAGTATCGTACGCTGCAGGTCGAC	ACCTTGAGCT CGGGTTTTAT CTCATACCAA GTATTATCAA CCTTTCGGTGTCGGTCTCGTAGCGTAGACGCCAATATCTTCTATCGATGAATTCGAGCTCG	ACTAGCTGAGAGCAGAGTAT	tag_13310_st	CGTAGACGCCAATATCTTCT	tag_13980_st	GGGCAACGGACGAACTATTA	ATATCAGGAAGCGACCAAGC	GAGATAAAGGGTGCCTGCAT	GCGTAGAAAGCTAACCAATTTCC	384	575	298	753	1784	2521
SUT477	4	-	924281	924537	479	244	CCTGTAAAACGAGTAATGTGAGCAGTAGAATAAGTGTATATCATCGATGTCCACGAGGTCTCTATTAGTACCGTGCCCACAGGCGTACGCTGCAGGTCGAC	AAAATTAGACTGAGAAAGTTCTGTATAGCTGTACTAATACATTAGCGGTGTCGGTCTCGTAGTACTCAGATCCGGTAATAGGATCGATGAATTCGAGCTCG	ATTAGTACCGTGCCCACAGG	tag_11740_st	TACTCAGATCCGGTAATAGG	tag_11812_st	TAGGGCTTCCTGGGTCTCTT	TCTGCGTTCCAACAGAAGTG	TACGCACTTCTGTTGGAACG	GCCAAGTTCTCATCCAATGC	721	880	426	906	1124	2445
SUT479	4	-	980065	980921	860	130	CAAAAATTTTCCTCAATCTTTTTAATTTTACTTTAATAGTACCAGGATGTCCACGAGGTCTCTATTTCACCGCCCTGGTAAGGCGTACGCTGCAGGTCGAC	ACGTACAAAATATGATACTTGTGTTCCTGCCACAGCAAAGTTGATCGGTGTCGGTCTCGTAGTAGTGACATCCCTGCATAGGATCGATGAATTCGAGCTCG	ATTTCACCGCCCTGGTAAGG	tag_11734_st	TAGTGACATCCCTGCATAGG	tag_11816_st	AATCCTTGCGTTTCAGCTTC	AGTCTTTGCTCTTCGCCATC	TAACTGATGGCGAAGAGCAA	AATAGGATTGGCGAAACTGG	681	681	954	992	1611	2332
SUT480	4	-	1018121	1019129	847	235	GGTTATGAATATGAGATTTCATAATCCAACTATGGCATCGACAACGATGTCCACGAGGTCTCTCAAACACCAGCCGTTGAAGGCGTACGCTGCAGGTCGAC	GAAGTAATCAGATGTGCAATGCGTCTTTAATGTTTCAGACTGGAGCGGTGTCGGTCTCGTAGTATAGCACCTGACTCATAGGATCGATGAATTCGAGCTCG	CAAACACCAGCCGTTGAAGG	tag_11715_st	TATAGCACCTGACTCATAGG	tag_11817_st	TCGAGAGGCCAGAAAAGAAA	CAGCAGCAACGAATAAAGCA	ACAATGCCACGCAAACATAC	TTTGGAATAAAAGCAAATCTCCTC	491	526	893	1028	1644	2213
SUT492	4	-	1340814	1342209	1061	276	TTCTGGCTTG TTATACTATT GTGAAGTAAG TGTCTAAATT CAAGAGATGTCCACGAGGTCTCTGACCTATGAGACGAGGCTCTCGTACGCTGCAGGTCGAC	AGGCCGCTCAGCTTATATTTTCAAGTCTCTCCATTTGGCTGTTTGCGGTGTCGGTCTCGTAGAGACCCTGTAATGCCATTCTATCGATGAATTCGAGCTCG	GACCTATGAGACGAGGCTCT	tag_13913_st	AGACCCTGTAATGCCATTCT	tag_13965_st	TTACTGGTGACCTCCTTGATGA	CGGCTAAAGACCGTAGAGTGA	GGAAACAATGTAGCGAAGCAG	TGAATAGGCATACTTGAATCTGAAA	289	601	292	864	2550	2186
SUT496	4	-	1493649	1493945	631	633	AGCAGGCACTGTAGTGTAACAGGTACGACATCATGGAGTGAATGGGATGTCCACGAGGTCTCTCACTACTGAGGAGACGTTCGCGTACGCTGCAGGTCGAC	GAACTCTTAACAATACATATTTTTACTGAAACACTTTGGTTAGCACGGTGTCGGTCTCGTAGTATTACCGGCCCACATGAGGATCGATGAATTCGAGCTCG	CACTACTGAGGAGACGTTCG	tag_11688_st	TATTACCGGCCCACATGAGG	tag_11803_st	ATGCGACACGTAAGCTCGTT	AATACATCCTCCACGACTACAACA	CATGTTGTAGTCGTGGAGGATG	ATACCCGGCTGGATTCTTTT	460	538	526	1045	961	2242
SUT500	5	-	8413	9765	860	3955	CTCGGGTCAAACACTACACATACTCAACGCCTATCACCATCACCTGATGTCCACGAGGTCTCTCACTTTATGACATGCAGGTGCGTACGCTGCAGGTCGAC	TCTCTACTTAAATTAATGCATCCTTTCCATTAATAGTTTATAACTCGGTGTCGGTCTCGTAGTCGAAGCTGGACTAACTAGGATCGATGAATTCGAGCTCG	CACTTTATGACATGCAGGTG	tag_1069_st	TCGAAGCTGGACTAACTAGG	tag_11824_st	CCCTCGGGTCAAACACTACA	AAATTGCGTTTCCTTGTTGG	AAATGGTTGCGTTTGGTAGG	TAGCAAAGCCACCGACTCTT	706	344	737	1175	1953	2178
SUT501	5	-	10501	11341	2948	2379	AGATCCAATTTGACAGGATTCTAGTACGTGAATACACACAGAATTGATGTCCACGAGGTCTCTCAGCCCGATAAGTTTGAAGGCGTACGCTGCAGGTCGAC	ATACGAAACTTTAGGAAGATTAACAGTCACTCCATAAAATCAGAACGGTGTCGGTCTCGTAGTCGTACTAGACACTTTGAGGATCGATGAATTCGAGCTCG	CAGCCCGATAAGTTTGAAGG	tag_11716_st	TCGTACTAGACACTTTGAGG	tag_11810_st	GGCATTTTCCTGTTCTGGTG	TTATTGGCTTTGGGCATCTC	ACCCCATACTTGCCGATAGA	TGATGACGGTGTGGACCTTA	723	749	664	1128	1799	2536
SUT509	5	-	186933	188114	2392	207	TTTACATGCCTTCGGTTCACATGGTAAACTCGAGCGTACTAAGTTGATGTCCACGAGGTCTCTGATAGTTGACCACCTCGCCTCGTACGCTGCAGGTCGAC	CAACTATTTA TACCATTAAA TATTCTTCTT AAGCTTTTTT TCGCGCGGTGTCGGTCTCGTAGGAGGGACGTTACGACATTCTATCGATGAATTCGAGCTCG	GATAGTTGACCACCTCGCCT	tag_13649_st	GAGGGACGTTACGACATTCT	tag_13964_st	ATACCCGCACTCATTGCTTC	AAGACCATTCCCAACTCCACT	CAAGGCGTCTCTTTCAGGTAA	GGGAAACCCGCTTGAATTAT	250	810	343	789	2336	2568
SUT515	5	-	363965	364309	1236	276	GTTCTAGGAACTTCTAGAATGTACTTCATTGCTCGAATGAAAAAGGATGTCCACGAGGTCTCTCATAGATACTAAGCCACAGGCGTACGCTGCAGGTCGAC	AGCAGATCTTTGTTAGGTAGATCTGCTAATATATTTTACGTAAGACGGTGTCGGTCTCGTAGTTATGAGCAGACCGAATAGGATCGATGAATTCGAGCTCG	CATAGATACTAAGCCACAGG	tag_11741_st	TTATGAGCAGACCGAATAGG	tag_11811_st	GCGTCACCAATTAGCCTTTC	CGTTCATAGGGGTGGGATTT	AAATCCCACCCCTATGAACG	CCAGGTCAATCCGGTAGATG	593	731	553	970	1127	2360
SUT518	5	-	522869	522933	205	431	AAAAAAAATGGAAAAAGAAAAAGAAACGTTTAGGGGAGAGGAGGGGATGTCCACGAGGTCTCTCATGAGCAGTTAGTACACTCCGTACGCTGCAGGTCGAC	GAGTAACGACAAGAACACAACCCTAAAAATCAGATGACCTAAGGGCGGTGTCGGTCTCGTAGTTGAGACCCGAACCCATAGGATCGATGAATTCGAGCTCG	CATGAGCAGTTAGTACACTC	tag_1111_st	TTGAGACCCGAACCCATAGG	tag_11813_st	TTGCTCGTATGTGGGTTTGA	GCCCATACACCCCATAAGC	GTATGGGCGGGGGAAATA	ATGGCTCAGGCTTATTGTGG	533	801	422	1001	948	2461
SUT532	7	-	17213	17709	2054	3269	TCGTCTCAAAAAGATAATATAATTTATTGTGCACAATATTTTGGAGATGTCCACGAGGTCTCTCCATCCGCAGCAGATTAAGGCGTACGCTGCAGGTCGAC	AAAAGGCTTATCATTCAGATGAGCTTAAGAATATACTTTTTGCGTCGGTGTCGGTCTCGTAGAACGATCCGGAACATTTAGGATCGATGAATTCGAGCTCG	CCATCCGCAGCAGATTAAGG	tag_11737_st	AACGATCCGGAACATTTAGG	tag_11849_st	CTGGGCAATTCCGATGTACT	TTTCTCGTCCACATCACTGG	TTGGTCGGTTATTTGTGCTG	TGCTATCGCTACATCGCAAA	715	815	497	858	1251	2332
SUT539	7	-	165607	166127	510	1231	TTAGTTTCTTCATCGTTCGATGCCTAAGCCGAGAATTTCAGAAGGGATGTCCACGAGGTCTCTCCCAGACTGCAAGATATTCGCGTACGCTGCAGGTCGAC	CTCCGATGGACCTTAGAAAGGAACTCCAAAATGCTGTGATGGACCCGGTGTCGGTCTCGTAGAACTTCGGTTCAATGCTAGGATCGATGAATTCGAGCTCG	CCCAGACTGCAAGATATTCG	tag_11676_st	AACTTCGGTTCAATGCTAGG	tag_11829_st	ACACCTGGCGAAAGAAGAAA	ACGTACAAGGGAACGGAATG	GGAGGTCAAGACGAAAACCA	GCGGATAAGTAAGGCACACC	726	876	452	980	1458	2515
SUT546/118	7	-	421471	422431	910	667	AAAGCTGTGGTCAGTTGGATAAGAGTTCTCTTGTACCCCTTGTGA GATGTCCACGAGGTCTCT TTTAGTGTGCCACCCGCTCT CGTACGCTGCAGGTCGAC	CTAATCAATATAAATGTAAAAGAAAATAGGAATTGCTGTCGATAG CGGTGTCGGTCTCGTAG TATCCGCGAGGACGGGTTAT ATCGATGAATTCGAGCTCG	TTTAGTGTGCCACCCGCTCT	tag_13912_st	TATCCGCGAGGACGGGTTAT	tag_13385_st	GGTGGGTGCGTTAGTCAGTT	CGTTTGCGTTTGCATTTTT	TCACGTCGAGCTTCATTTTG	GTTCCCGAAAGAGTGGATCA	311	568	381	807	1416	2033
SUT553	7	-	627335	627607	247	203	TAACGATTCTCCCTTGGGCCCCTTATGATATGTCTAAATATTGCC GATGTCCACGAGGTCTCT GCTACGTTCAAGCCCGAAGT CGTACGCTGCAGGTCGAC	CATACAAAGCAAGACAAAGAAACATTTTTAGATCTAACATTTTAC CGGTGTCGGTCTCGTAG TTGGATCAGCACCGCGAAGT ATCGATGAATTCGAGCTCG	GCTACGTTCAAGCCCGAAGT	tag_14012_st	TTGGATCAGCACCGCGAAGT	tag_14013_st	CCCTTGGGCCCCTTATGATA	CCAATGTCATATCTACAAAC	GAAGATCGAGTAGGGGACGG	CGAAGTGAAGTATTCAGGAG	100	367	158	1038	387	1780
SUT570	7	-	958775	959687	562	221	CACACGGAACTGAAATGAAACTTTAACGGCAACAATTCAATAATAGATGTCCACGAGGTCTCTCCTTGATGTGTATGACGTAGCGTACGCTGCAGGTCGAC	TATATACTAAGCAATATAACCGAATTGATTAAGTAGTTGGTTAATCGGTGTCGGTCTCGTAGAATTACAGTGGGATACACGGATCGATGAATTCGAGCTCG	CCTTGATGTGTATGACGTAG	tag_11141_st	AATTACAGTGGGATACACGG	tag_11859_st	CAGCATCGCCTAAAACTTCC	GCCACCTGAAAATACGGAAA	CCGTGCCCTATTATTCTTGC	ATGTTGCCTCCAAAGGGTTA	609	853	681	1168	2015	2680
SUT571	7	-	999582	1000310	438	622	CAAGTAATGAATATCTGGCGGTTCCGCGGTAATGCGACAATTTGTGATGTCCACGAGGTCTCTCGACAACAGTCGCTTCAAGGCGTACGCTGCAGGTCGAC	TTATAAAAAAAGATAATTTTTTTAAAAAAAAAAAAAAATACAAGTCGGTGTCGGTCTCGTAGACAGTCCCATATGATAACGGATCGATGAATTCGAGCTCG	CGACAACAGTCGCTTCAAGG	tag_11706_st	ACAGTCCCATATGATAACGG	tag_11852_st	CGCTCAGGTAATCGCTCAAT	TTGAGGAACTCTCTGCATCG	TGCACAGCACTTATCCAGAGTT	CGGACTTGGGCTACATTCAT	473	551	342	867	1228	2077
SUT591	8	-	406222	406766	3253	340	CCATTTAACCCAATTTTATCTCTCATCCGCTCCACATATATGTAT GATGTCCACGAGGTCTCT CCTCCGTAGTGAGTAGTTAT CGTACGCTGCAGGTCGAC	TGGACACTATATATTACGTCATCTGACATACGACACTGATAACAA CGGTGTCGGTCTCGTAG TAGGGTAGCCGGATTCCTCT ATCGATGAATTCGAGCTCG	CCTCCGTAGTGAGTAGTTAT	tag_13381_st	TAGGGTAGCCGGATTCCTCT	tag_13909_st	CCATCAGCTTCTGTCACCCTA	ATGTTTACATGCGAACAGTACCA	GGTTTGCGGATAAAGTGTGG	TGAATGGAATTGGTGTGTTGA	279	553	352	750	928	1931
SUT593	8	-	465112	465504	2610	1486	GATCCAACGCGAGACATAATCTGTATTAGCTTCATAACCATACTC GATGTCCACGAGGTCTCT CCGGGCTATTAATCCAGTAT CGTACGCTGCAGGTCGAC	CTATCTGAACATTGAGGTCGAATATATATATTATAGGCATAAAAT CGGTGTCGGTCTCGTAG AAACGCCTATCAGCTGTGCT ATCGATGAATTCGAGCTCG	CCGGGCTATTAATCCAGTAT	tag_13309_st	AAACGCCTATCAGCTGTGCT	tag_13837_st	AGGGGGTATGAGGTTTCGAC	TGTCGACTATGGCTCCTTACTG	TCCACCAAGATAGAATCCGTTT	AAACGTACAGGCGCACACTA	299	573	342	705	751	1936
SUT602/176	9	-	35197	36013	419	1376	TGTAATATACAACCATGATTTCACTTCCCCTGGCGCAACAGTATG GATGTCCACGAGGTCTCT TCTTTATAGGACCGGGAAGT CGTACGCTGCAGGTCGAC	ATGATCAAACAACTACTGGCTCTAATATATGGTTTCGGCTACATA CGGTGTCGGTCTCGTAG TACTACTATCCGTGGGAAGT ATCGATGAATTCGAGCTCG	TCTTTATAGGACCGGGAAGT	tag_14014_st	TACTACTATCCGTGGGAAGT	tag_14015_st	ACGTGTGGATGCTAAGCCCC	GGGAGATACCGTACGGAGGT	TCGCCAGAATAGTCGAGATG	GGCACTACACGGAAGAGGAC	136	378	246	1049	1450	1764
SUT616	9	-	427341	429437	2832	2670	GGTAATAAAGTTGTTGCCAAACCAGGTACAGTAAATCAAATGTTTGATGTCCACGAGGTCTCTCGCGGTAATGACCTATAAGGCGTACGCTGCAGGTCGAC	AAACTTTTTGCCTTTTTTTTTTTCACTGGTTTTCAGGCACATTTTCGGTGTCGGTCTCGTAGAGCCATAGCTGAGTACACGGATCGATGAATTCGAGCTCG	CGCGGTAATGACCTATAAGG	tag_11722_st	AGCCATAGCTGAGTACACGG	tag_11860_st	CGGTTAAAAAGAGGGCAACA	CCTTCCATCTTTTTCTCAAACC	TGGGGCTCTCTTGTGTTTCT	GGTATGAGGACGGAGTTGGA	776	527	1363	1208	2913	2394
SUT643	10	-	605932	607420	285	881	ATATTTTCAAACTTATATAATTAATAATAATTAATAGCGCTTAGTGATGTCCACGAGGTCTCTCGGACGTGATATAAGATTCGCGTACGCTGCAGGTCGAC	AGTTTAAATATCTGAAGAAGCAAAAATACCGAACTACAAGGGAAGCGGTGTCGGTCTCGTAGATATCATGCACCGGACACGGATCGATGAATTCGAGCTCG	CGGACGTGATATAAGATTCG	tag_11673_st	ATATCATGCACCGGACACGG	tag_11858_st	GATGGAGGGTTGGCATAAAA	GCAGCCATGATTAGGAGAGG	CATGGGTGATTGCGTTTACA	TTTTGTTTGTGGGGAGAGGA	1029	877	533	902	2349	2438
SUT729/CUT773	13	-	433296	434129	1959	598	ATTTGTTATATACGCTTGCTACATTTATATCCTGCACTGACGTGTGATGTCCACGAGGTCTCTGATGGCACCCATGCATTGCTCGTACGCTGCAGGTCGAC	GTTATGAAAC ATATTATTGG AGGCATGCAC TATTACCTAA CGTCGCGGTGTCGGTCTCGTAGATTCGTGACGGGACTCTTCTATCGATGAATTCGAGCTCG	GATGGCACCCATGCATTGCT	tag_13838_st	ATTCGTGACGGGACTCTTCT	tag_13981_st	AGGAAAATAATGTGCGTGGAA	AGCCCATAGGGTCCTTTAACA	CCGACAATAGGCAGTATGCAG	GGGAGCACATCCCTTTGAA	285	559	250	833	1943	2180
SUT733	13	-	616045	616325	4306	240	TTTTTCATACCTCTCGAGAAAAATTGCCTTGGCGCGTTCCTCCTAGATGTCCACGAGGTCTCTCTCCATCAGTCGGTATAAGGCGTACGCTGCAGGTCGAC	AAATCACTATTTACTTATCTAAAATGTACCTGCGAAGTCTGCATGCGGTGTCGGTCTCGTAGATTTCCAGGCGACGAGTAGGATCGATGAATTCGAGCTCG	CTCCATCAGTCGGTATAAGG	tag_11723_st	ATTTCCAGGCGACGAGTAGG	tag_11834_st	ATGTCGTTTTGCTCGGTCTC	GGTGTTTCCCATCCAGCATA	GGATTATGCTGGATGGGAAA	GACGTTTTTGCGTTTGCTTT	719	845	447	936	1143	2440
SUT737/313	13	-	731392	732392	315	860	TGCGAACTCTAAGAACTATATGTCACTAAAATAATTATTAAAAAAGATGTCCACGAGGTCTCTACGTCGTCAGCATGTGTTATCGTACGCTGCAGGTCGAC	ACCGCGGCAA CAAGTAAGTT TACGTCTACT AATAATTTGT TGAATCGGTGTCGGTCTCGTAGCCAGCGTGTCGAGTGATTCTATCGATGAATTCGAGCTCG	ACGTCGTCAGCATGTGTTAT	tag_13388_st	CCAGCGTGTCGAGTGATTCT	tag_13972_st	TTCTTGCTTTGGCATCAACA	CGTTGTCTTCCGGTGTTTTT	AAAAACACCGGAAGACAACG	GGAAACCTCTTACGCACTGG	388	593	380	1075	1872	2253
SUT764	15	-	39170	40266	4420	526	AATACAGGCGTATGCTCTTGTAATAACATACTGTAGTTGCCTAATGATGTCCACGAGGTCTCTCCGGAAAGTGGATTTGGCCTCGTACGCTGCAGGTCGAC	CAATCCTTAC TGCTATTTGC AGATGGACTG ACGGTTATGC ATTCACGGTGTCGGTCTCGTAGGGACCGTATGACACTATTCTATCGATGAATTCGAGCTCG	CCGGAAAGTGGATTTGGCCT	tag_13652_st	GGACCGTATGACACTATTCT	tag_13973_st	ATTTCGGCTGCGTTACTTGA	TGCAAAGGGGATCTATACGC	CAGGAAATGCGCTACTGTCA	CAACAAGGACCTGGAGAGTTG	296	793	291	886	2206	2182
SUT796	15	-	980951	981471	271	354	AATAAAAAAAGGACATCAGCAAGTTCGTAGTCAATAAATGTGATGGATGTCCACGAGGTCTCTCTCTTTAAGTGTTGGGAAGGCGTACGCTGCAGGTCGAC	TACTAAACGATTTCAATTTTCGTTTTATATCCTTCCTATTCATAACGGTGTCGGTCTCGTAGCACTTACGAGCATATGTAGGATCGATGAATTCGAGCTCG	CTCTTTAAGTGTTGGGAAGG	tag_11712_st	CACTTACGAGCATATGTAGG	tag_11840_st	TCCAAATCGCTGTCCAATAA	ATGCCGCGTTCACAGATT	TTGGACGGATTATTCATGTCAG	ATTGTATGGGCGTGTGGTCT	647	700	378	896	1198	2255
SUT824	16	-	587714	588212	2129	2814	CTTGAATTTAAACAAGTGATCTTGACTTGAATACTTCCATCAATGGATGTCCACGAGGTCTCTGCAGTGTGTCGATCGTCTCTCGTACGCTGCAGGTCGAC	TTCTGGGATA TAACAAATAG TTCCCTTTGG ATTACTTAAA ACATACGGTGTCGGTCTCGTAGTAGGCTACCCCAGGTCTTCTATCGATGAATTCGAGCTCG	GCAGTGTGTCGATCGTCTCT	tag_13919_st	TAGGCTACCCCAGGTCTTCT	tag_13983_st	TGTTTGGAGAAATTAGGAACGAA	TGCAGCCATTTTCATTTTAGC	TGCCTTTTTGACTCTCCTTCA	TGTCTTTGGACTAATGTCAGCAA	249	860	388	874	1608	2298
SUT827	16	-	619767	619983	4388	1275	AGGTTCTACCCCGCAGTGTTTGCTTAATTTACATAGGACCCTTTTGATGTCCACGAGGTCTCTCTTTCACAGTATGGAGAAGGCGTACGCTGCAGGTCGAC	TACTTTGTATAAATTGAAGAAAATGAGTTTGTGTTAGTTGGGTCCCGGTGTCGGTCTCGTAGCAGCCTGCATGACGATTAGGATCGATGAATTCGAGCTCG	CTTTCACAGTATGGAGAAGG	tag_11707_st	CAGCCTGCATGACGATTAGG	tag_11844_st	GGAGAGAAAAAGGCCCAAAC	TTCATCGTCCCCAGTTTTTC	ACCCCACCTTGAGAAAACCT	TCTCGTCAGTAGGGTTTGAACA	547	797	281	865	960	2321
SUT830	16	-	645415	645679	1579	271	GATCACGCAGATGACTAACCGCCAGTCACAGCGCATATTAGCGCGGATGTCCACGAGGTCTCTGAAACGCCATATGTAGAAGGCGTACGCTGCAGGTCGAC	AAGAAGAAAAAGAAACGAACCAGAAGAGGGTAGCAGAATCAGTCACGGTGTCGGTCTCGTAGCATGACTCACCACTATTAGGATCGATGAATTCGAGCTCG	GAAACGCCATATGTAGAAGG	tag_11708_st	CATGACTCACCACTATTAGG	tag_11846_st	GAGACTGGCGAAAGAGATGG	GTGCGTGATTGGTAATGCAG	GACAGCCACACCCACCTT	TGGTCCGATAACATTGACGA	565	638	653	1063	1047	2360
SUT834	16	-	769743	770687	1991	966	ATCATAGCATAAAACGCGTAGAAGGCGATCTTAAGTTTGAGTCCCGATGTCCACGAGGTCTCTGACAAGCTGTACTAACTTCGCGTACGCTGCAGGTCGAC	TTACCTTCCGAAAAAGGTACATTGCCAACCTTATTTGATAAATGTCGGTGTCGGTCTCGTAGCCAACAGTGTCTGAATTAGGATCGATGAATTCGAGCTCG	GACAAGCTGTACTAACTTCG	tag_11679_st	CCAACAGTGTCTGAATTAGG	tag_11842_st	CACTTTCCTAAACGGGCTCA	AGCTACGGCCTTTCCAAAAT	CCCAACTCATACACCCCAAA	CATGAGACAAAACCCGTCCT	528	529	394	950	1505	2138
SUT842/425	16	-	828618	829660	478	258	ACAAAACAAAGACTCTTTTATAAAGGAAAATCTGACAGAAGATTGGATGTCCACGAGGTCTCTGAATAGACGGCTCCATGCCTCGTACGCTGCAGGTCGAC	CCATATACAA TTAACTATAT CAATTTCCTG AACAAAGAGA TTACACGGTGTCGGTCTCGTAGATAGCCCAGGAGGCACTTCTATCGATGAATTCGAGCTCG	GAATAGACGGCTCCATGCCT	tag_13653_st	ATAGCCCAGGAGGCACTTCT	tag_13976_st	CTGGAGCTGTGCCTATGTTG	ATTTCCCTCCCCTCTTCCTC	CACTTTTATGTTTTGGGCATTTT	TCACTAGGGGTCCGAATCTC	477	712	300	915	2152	2235
SUT847	16	-	935906	937282	1872	1750	TATATTGTAA TTGATCGAAA AGAAGTTAAG AAATTTTTAA TTACTGATGTCCACGAGGTCTCTCGCTCATACGCATTATCTCTCGTACGCTGCAGGTCGAC	TACTAACAACACCGTTCCTAAACTAGCAGAAAGTTGACCAACTGTCGGTGTCGGTCTCGTAGAGCGCGGAGTCACTACTTCTATCGATGAATTCGAGCTCG	CGCTCATACGCATTATCTCT	tag_13917_st	AGCGCGGAGTCACTACTTCT	tag_13977_st	CGCTTTTCGTCGATTAACTTG	TGCGTTGCCCGATTACTT	TTGATTTATCGTCCTTCGTATGG	TGGACCCATTGACTTTGACTG	312	533	300	1192	2486	2176
tA(AGC)F	6	-	204924	204977	174	1280	AGTAAACCTGTATCATTTCTGTTTGGAAGATTTCAACAAACGTTCGATGTCCACGAGGTCTCTTTCTAGCCGACCGTAGGCATCGTACGCTGCAGGTCGAC	CTCTATAGATAGAGAGATTTGACAAAAAAAATAAAAAAATTTAAACGGTGTCGGTCTCGTAGATGGCTACGCCAGTTCAGCTATCGATGAATTCGAGCTCG	TTCTAGCCGACCGTAGGCAT	tag_12982_st	ATGGCTACGCCAGTTCAGCT	tag_13726_st	GCTGAAATGCAAGGATTGGT	CTACCGACTACGCCACACG	CCCTTAGCATGGGAGAGGTC	AATGACTGCTCTTCGGGGTA	438	714	381	958	826	2331
tA(AGC)G	7	+	774349	774421	1895	772	TTTACTTCATTATTCTTCTCTATTCTCCCCTTTCATCAATTAATTGATGTCCACGAGGTCTCTCTATCACGTAAGAGACTCCTCGTACGCTGCAGGTCGAC	AAGAGCCGTAATATTCCAGTATACCTCATTAAAAGTAAAAAAATTCGGTGTCGGTCTCGTAGATTTCGGAGGTCCCGCGTATATCGATGAATTCGAGCTCG	CTATCACGTAAGAGACTCCT	tag_13675_st	ATTTCGGAGGTCCCGCGTAT	tag_13326_st	GGCAGAAGGCGGATTTATTT	CTACCGACTACGCCACACG	CGTGTGGCGTAGTCGGTAG	TCGAGCGACTGAAAATACGA	568	844	635	1187	1185	2690
tA(AGC)H	8	-	146242	146314	2246	2355	CCGGTATTACTCGAGCCCGTAATACAACACATTCAACAAATATCAGATGTCCACGAGGTCTCTTTCTTAGGACCGAGCGCCATCGTACGCTGCAGGTCGAC	ATTAACAGACCTTTATAGTACTGTTATGGTAATAACAAAAAAGATCGGTGTCGGTCTCGTAGCAGCAAAGATCATCGTCACTATCGATGAATTCGAGCTCG	TTCTTAGGACCGAGCGCCAT	tag_12927_st	CAGCAAAGATCATCGTCACT	tag_13463_st	TGAGACAAAACCCGTCCTTC	CTACCGACTACGCCACACG	AGAGGTCTCCGGTTCGATTC	TGTGGTGTGATGGAATGTGA	281	557	420	1010	721	2226
tA(AGC)J	10	-	197313	197385	1026	7920	TACTGACGTATCTCACTTTGATAAACAACAATATCAATAATATTAGATGTCCACGAGGTCTCTTTGAGGCTACAACCCGGCATCGTACGCTGCAGGTCGAC	TTTAAGTTGATTTTCTTATTATTGTCGTTGAGAACAAAAAGAAATCGGTGTCGGTCTCGTAGTCATTACGGCAGGCAGAGCTATCGATGAATTCGAGCTCG	TTGAGGCTACAACCCGGCAT	tag_12985_st	TCATTACGGCAGGCAGAGCT	tag_13727_st	CTTCTGCAATAGGCGCAATC	CTACCGACTACGCCACACG	CGTGTGGCGTAGTCGGTAG	TGAAGAGGAGGAGGACGATG	298	574	583	1135	863	2368
tA(AGC)K2	11	+	517988	518060	2925	138	AATATATGATCCAATTCCTAGGACATCAGAAAATATATCTACTATGATGTCCACGAGGTCTCTATGCCGAGGCAGAGCTAACTCGTACGCTGCAGGTCGAC	AAGCTTACATACGGAAAGAGAAAAAAAAAAAAAGAAATTTTAAAACGGTGTCGGTCTCGTAGCAACGACCGCAAGGAGCTATATCGATGAATTCGAGCTCG	ATGCCGAGGCAGAGCTAACT	tag_13412_st	CAACGACCGCAAGGAGCTAT	tag_13287_st	CCTTGCACTTCAGCTTCCTC	GCTACCGACTACGCCACAC	CCCTTAGCATGGGAGAGGTC	GTCTCTTTCGCTCTCGGTTG	358	633	532	1109	896	2401
tA(AGC)L	12	-	656934	657006	10519	1820	TACTGACGTACCCCATTCTGAAACACAACAGACAACAAGAAAATTGATGTCCACGAGGTCTCTTTGATAGCCCCCTCAGGCATCGTACGCTGCAGGTCGAC	TCGAATAATAATTGGAGGTTGAAGAAGTTGCAAAAAATATTTACTCGGTGTCGGTCTCGTAGACTAGGCGACGGATGTCACTATCGATGAATTCGAGCTCG	TTGATAGCCCCCTCAGGCAT	tag_12978_st	ACTAGGCGACGGATGTCACT	tag_13464_st	GGTGAACTGGAGGTCTCAAAA	GCTACCGACTACGCCACAC	CGTGTGGCGTAGTCGGTAG	GAAGATGACGCAAATGATGAGA	424	699	520	1072	925	2430
tA(AGC)M2	13	-	768369	768441	330	842	AACTGATTTCACTTTTTACAGTGGCTAGAAATTACAATAAGAAATGATGTCCACGAGGTCTCTTTTGCGACGAACCCGGTCATCGTACGCTGCAGGTCGAC	AATTTTAAATATGAAGTTACACTAATTGCAAAGTAGCAAAAAATTCGGTGTCGGTCTCGTAGGTTATGCTCAGCGTGTCACTATCGATGAATTCGAGCTCG	TTTGCGACGAACCCGGTCAT	tag_13032_st	GTTATGCTCAGCGTGTCACT	tag_13465_st	GGGGTAGGTGGTTCCTCTTC	CTACCGACTACGCCACACG	CCCTTAGCATGGGAGAGGTC	CCGAGCCCTAAATCTGTGTT	484	760	429	1006	920	2425
tA(AGC)P	16	+	856902	856974	13640	609	CCGGTATTACTCGAGCCCGTAATACAACAATTTACAACAAGATTCGATGTCCACGAGGTCTCTGATAGTTCGCAACGACTCCTCGTACGCTGCAGGTCGAC	TTTATACGAAATATACATTTTGTATTCCATAATCAAAAATTAAAACGGTGTCGGTCTCGTAGACCTACGTGTAAGCCATGCTATCGATGAATTCGAGCTCG	GATAGTTCGCAACGACTCCT	tag_13676_st	ACCTACGTGTAAGCCATGCT	tag_13815_st	CATGAGACAAAACCCGTCCT	CTACCGACTACGCCACACG	CGTGTGGCGTAGTCGGTAG	CGGTTGTTGTTTTCGACGTT	283	559	400	952	665	2170
tA(UGC)A	1	+	166267	166339	7301	2532	CTAAGCACTTACCATTCCTTCATAAGTCTAGTATTGTAATGAGTTGATGTCCACGAGGTCTCTGGTATGTCTCGGCATCGTCTCGTACGCTGCAGGTCGAC	GTCAGCTATTCACGAATTCAATTGTGTTGGATTAACAAAAAAATTCGGTGTCGGTCTCGTAGTTAGTGGCCTCCACCGCTATATCGATGAATTCGAGCTCG	GGTATGTCTCGGCATCGTCT	tag_13940_st	TTAGTGGCCTCCACCGCTAT	tag_13288_st	ATCAATCCTTGCGTTTCAGC	AACCGATGACCTCTTCCTTG	TGCAAGGAAGAGGTCATCG	ATGAACAAAGGGCGGTATCA	296	539	626	1208	901	2406
tA(UGC)E	5	-	312023	312095	824	1403	ATACGGAGGTACCCCGTGTTGAGATCCAACACATACAGAAATTCTGATGTCCACGAGGTCTCTAACCCTTTAGGGAGGTGGATCGTACGCTGCAGGTCGAC	CGGTCTAACAAAAACAGAGAAAAACTTGGTACAAAAAGATTTCATCGGTGTCGGTCTCGTAGTTACTGAGGGACATAGAGCTATCGATGAATTCGAGCTCG	AACCCTTTAGGGAGGTGGAT	tag_13168_st	TTACTGAGGGACATAGAGCT	tag_13729_st	TACCGCTCTCCTCTTGGTTG	AACCGATGACCTCTTCCTTG	AGAGGTCATCGGTTCGATTC	AGCAGGAGATGCCAGAAAAA	526	769	364	954	877	2382
tA(UGC)G	7	+	794417	794489	1364	1003	TTTTTATACGTAACGCAGCATCTACCGTAAAATCCCATAGATTGCGATGTCCACGAGGTCTCTGACCCTTTAGACCAGTAACTCGTACGCTGCAGGTCGAC	TTTGAAAATAAATTTAAACCCAAAAAAAATGAAATGTTAAAAATACGGTGTCGGTCTCGTAGGGTATGCCTTCCCATCTACTATCGATGAATTCGAGCTCG	GACCCTTTAGACCAGTAACT	tag_13413_st	GGTATGCCTTCCCATCTACT	tag_13552_st	ATAAAAGGCGTGCGAAACAG	TACCAACTGCGCCATGTG	GGAAGAGGTCATCGGTTCG	TGAGGAGCAATGTGGATGAA	451	728	589	1176	1058	2563
tA(UGC)L	12	-	214883	214955	427	7177	AGTACTAAGTAGTCAAATAATTTCCTCTCCTTTGTACGCGTTTTAGATGTCCACGAGGTCTCTAACCGCGAGTCACCTCATATCGTACGCTGCAGGTCGAC	TCTAGAAATTGTTAAAAATAAAGGAGAATAAAAGTAAAAAATAAACGGTGTCGGTCTCGTAGGCCTAGTCCTGATTAGAGCTATCGATGAATTCGAGCTCG	AACCGCGAGTCACCTCATAT	tag_13235_st	GCCTAGTCCTGATTAGAGCT	tag_13730_st	AGAGGAAGCTGAAACGCAAG	AACCGATGACCTCTTCCTTG	TGCAAGGAAGAGGTCATCG	CGAGATGATGGGATGTGAAA	404	647	432	1014	815	2320
tA(UGC)O	15	-	854187	854259	830	5999	ACTGACATATCTCATTTTGAGATACAACAGTTTCAACAGTCATCAGATGTCCACGAGGTCTCTAAGCGATGCTGATTAGCGATCGTACGCTGCAGGTCGAC	ACATTAAAAAAAATATGCTTTTATACATTGATCAAGCTTAAAAATCGGTGTCGGTCTCGTAGTTCACTGGCGAAGACGAGCTATCGATGAATTCGAGCTCG	AAGCGATGCTGATTAGCGAT	tag_13117_st	TTCACTGGCGAAGACGAGCT	tag_13731_st	AGGAAGGACGGGTTTTGTCT	AACCGATGACCTCTTCCTTG	TGCAAGGAAGAGGTCATCG	ACTCGGAAAGCACGGTATTG	189	432	387	969	555	2060
tC(GCA)B	2	-	643007	643078	797	2472	AATTGACTATACTATCTATATTAGTCTTCCCACATGTAATAGAAAGATGTCCACGAGGTCTCTCAGGGACTATCACTTCAGATCGTACGCTGCAGGTCGAC	TGCAGCAAGAAAAAAAGTTCAATAAGGATTGCAAAAAAAAAAAGACGGTGTCGGTCTCGTAGTGACGTTAGGCCATATAGCTATCGATGAATTCGAGCTCG	CAGGGACTATCACTTCAGAT	tag_13065_st	TGACGTTAGGCCATATAGCT	tag_13742_st	AGCCCATTCCAAACATAGCA	CGCACTCAGGATCGAACTAA	TTGGTCCTTAGTTCGATCCTGAGTG	AACGCACATTTCTCGGTAGG	319	549	396	987	689	2195
tC(GCA)G	7	-	707108	707179	607	6530	TACTGACATATCTCATTTTGAGATACAACACTTTCAGAAAATCAAGATGTCCACGAGGTCTCTCAGTCACGGAAGAGATAGATCGTACGCTGCAGGTCGAC	TCAAAAAAAAAAAACTTTCATGGAAGGACCACCTAGTTAATAAAACGGTGTCGGTCTCGTAGCGGCGATGACCATTATAGCTATCGATGAATTCGAGCTCG	CAGTCACGGAAGAGATAGAT	tag_13077_st	CGGCGATGACCATTATAGCT	tag_13743_st	AAGCTCATACTGGGGTGTGG	TCGCACTCAGGATCGAACTA	TGGTCCTTAGTTCGATCCTGA	CAACCAAGTCCTGTGTCCTG	506	735	356	948	836	2342
tC(GCA)P1	16	-	435893	435964	1370	8615	TGGATAAGTGTTATTATTCTATTGCCTTAAAACTATACAACAAAAGATGTCCACGAGGTCTCTCAGTGCAGGTGATGTGATATCGTACGCTGCAGGTCGAC	CGTACAGGCGAACGTATATAATTAAAATTCTTTGGAAAAAAAGAACGGTGTCGGTCTCGTAGAGTATCTCTGGATCCTAGCTATCGATGAATTCGAGCTCG	CAGTGCAGGTGATGTGATAT	tag_13252_st	AGTATCTCTGGATCCTAGCT	tag_13744_st	GAAACATATAAAACGGAAGGAGGA	TACCACTGCGCCATACGAG	CAGTGGTAGCGCAGCAGAT	CGACAAAAAGGCTGGAAAAA	480	758	620	1182	1093	2599
tC(GCA)P2	16	-	775765	775836	583	2747	TGAGATATAACATTCTAGGATAATCAAAATTACCATAATTCAAAAGATGTCCACGAGGTCTCTCATCAGAGCCAATATCCGATCGTACGCTGCAGGTCGAC	AAAAAAAAATGACTAGCAAAATAAAATTAGTAGTCTAAAAAAGAACGGTGTCGGTCTCGTAGCCGATCTTCGGACTTAGTATATCGATGAATTCGAGCTCG	CATCAGAGCCAATATCCGAT	tag_13114_st	CCGATCTTCGGACTTAGTAT	tag_13319_st	TCTTTGCATTTCAGCTTCCA	TCGCACTCAGGATCGAACTA	TGGTCCTTAGTTCGATCCTGA	TCGTGGTTCTCTCCCATTGT	450	679	628	1220	1052	2558
tD(GUC)B	2	+	405960	406031	709	1138	TCAGAAGATTATGGGTTCGACCCCCATCGTGAGTGCTTTGTTTCTGATGTCCACGAGGTCTCTATGATCGTGGGACTCGGTCTCGTACGCTGCAGGTCGAC	GTACTAAGGAGGCAGAAGAATAACTGCAGGAGTAGCCAAAAAAATCGGTGTCGGTCTCGTAGAGAAGGGCATAGGACCATCTATCGATGAATTCGAGCTCG	ATGATCGTGGGACTCGGTCT	tag_13947_st	AGAAGGGCATAGGACCATCT	tag_13855_st	TGCCAACTTCTCCAATGATCT	CGCCCATTCTGACCATTAAA	GTCAGAATGGGCGCTTGT	GGGATTGGACGATGAAAAGA	607	875	606	1173	1201	2707
tD(GUC)D	4	+	568964	569035	261	735	TCAGAAGATTATGGGTTCGACCCCCATCGTGAGTGCTTTGTTTCTGATGTCCACGAGGTCTCTATTTCGGAGCCGTAGACACTCGTACGCTGCAGGTCGAC	ATTTACTCTTTCTCCTGTACCTGCTACTATCAATTAAAAAAAATTCGGTGTCGGTCTCGTAGGAGGGCTTCAGCGACTCTATATCGATGAATTCGAGCTCG	ATTTCGGAGCCGTAGACACT	tag_13420_st	GAGGGCTTCAGCGACTCTAT	tag_13297_st	GGGCTTGTACGAATCAGGAA	CGCCCATTCTGACCATTAAA	CAGATCGGGGTTCAATTCC	TGGTGGCGTTTTCTTTTTGT	358	626	534	1126	905	2411
tD(GUC)G1	7	+	531610	531681	2346	915	ACAATATGATATATTGCTAGTTGAAAATCGAACACTCGAGTTACTGATGTCCACGAGGTCTCTGTAGACGTATCTCCAGTCCTCGTACGCTGCAGGTCGAC	GTTTCTTCAGTTTTGCTATCTTATTTTTGTGATGATAAAAAATATCGGTGTCGGTCTCGTAGAACTTCGATGGGAGGCTGCTATCGATGAATTCGAGCTCG	GTAGACGTATCTCCAGTCCT	tag_13684_st	AACTTCGATGGGAGGCTGCT	tag_13825_st	GAGAGCGCATGGAAGAAAAC	CGCCCATTCTGACCATTAAA	GTCAGAATGGGCGCTTGT	CCCAGAAAAGCCGTTGAATA	344	612	619	1186	951	2457
tD(GUC)G2	7	-	544577	544648	1024	1509	AACTAAAATAGTATGCTATAAGAGTCACATTTCACAGATATTTCTGATGTCCACGAGGTCTCTATGGGTTCATGACCTCCGATCGTACGCTGCAGGTCGAC	CAGTGGTATTAACCTCTTCTAAGAAGAGCAGAAAAAGAAAAAAATCGGTGTCGGTCTCGTAGTTGCTCAGGCCATGCAGACTATCGATGAATTCGAGCTCG	ATGGGTTCATGACCTCCGAT	tag_13115_st	TTGCTCAGGCCATGCAGACT	tag_13474_st	TGCCAAATTCGTGTCTGTGT	ACAAGCGCCCATTCTGAC	CAGATCGGGGTTCAATTCC	ACGGCTGGGACGAATAAGTA	534	797	417	1009	959	2465
tD(GUC)I1	9	-	324303	324374	1961	1152	ATTGACGTATCGCATTTTGAGATACAACAATATCACATCTAATATGATGTCCACGAGGTCTCTATTGTGCTGCGAGTCCCGATCGTACGCTGCAGGTCGAC	TTTGAACAAGTAGCACATTATTCATTGAATAAATGCTAAAAAAATCGGTGTCGGTCTCGTAGCTTAGTACGGAAGATGAGCTATCGATGAATTCGAGCTCG	ATTGTGCTGCGAGTCCCGAT	tag_13109_st	CTTAGTACGGAAGATGAGCT	tag_13738_st	CCAACATTCCGACACAACAA	CGCCCATTCTGACCATTAAA	CAGATCGGGGTTCAATTCC	CAGTGTCTCGCTTCCCACTT	491	759	440	1032	944	2450
tD(GUC)J1	10	+	204735	204806	8448	499	AATAGTGAAGGATACATTAAACACGCTCACAAAACAACATAAAAAGATGTCCACGAGGTCTCTTGACAAAGAACAGTCGGTCTCGTACGCTGCAGGTCGAC	AAGGTGGAAATTGTACCAGAACAGTCATCAAGGGCCAAAAAAAATCGGTGTCGGTCTCGTAGAGACGGGATGGCAGCTCTATATCGATGAATTCGAGCTCG	TGACAAAGAACAGTCGGTCT	tag_13948_st	AGACGGGATGGCAGCTCTAT	tag_13298_st	AGGAAGCTGAAGTGCAAGGA	CGCCCATTCTGACCATTAAA	CAGATCGGGGTTCAATTCC	TGTTGCTGTTCGATTTTTGG	589	857	618	1210	1220	2726
tD(GUC)J2	10	+	355456	355527	3070	497	TCAGAAGATTATGGGTTCGACCCCCATCGTGAGTGCTTTGTTTCTGATGTCCACGAGGTCTCTATAGCTTGCACAGCGAGTATCGTACGCTGCAGGTCGAC	CAATCTGGATCTTAAAGTAGTAACTACAACAGCTTCAAAAAAAATCGGTGTCGGTCTCGTAGGTACCGGATCAAGCTCTGCTATCGATGAATTCGAGCTCG	ATAGCTTGCACAGCGAGTAT	tag_13313_st	GTACCGGATCAAGCTCTGCT	tag_13826_st	AATCCTTGCGTTTCAGCTTC	CGCCCATTCTGACCATTAAA	CAGATCGGGGTTCAATTCC	GTCGGTTGGATTGCCTTTT	444	712	388	980	845	2351
tD(GUC)J3	10	-	374424	374495	625	1279	TCAGAAGATTATGGGTTCGACCCCCATCGTGAGTGCTTTGTTTCTGATGTCCACGAGGTCTCTCACACCGCGACCGTATAGATCGTACGCTGCAGGTCGAC	AACAAAGCATTAATGAAGAATAACTACAGGAGTAGCCAAAAAAATCGGTGTCGGTCTCGTAGTTTCGAGGCGAGCCATAGCTATCGATGAATTCGAGCTCG	CACACCGCGACCGTATAGAT	tag_13079_st	TTTCGAGGCGAGCCATAGCT	tag_13739_st	ATTCACCTGCATCCCAAAAA	CGCCCATTCTGACCATTAAA	CAGATCGGGGTTCAATTCC	GTGCTTAGGAGGCGTGTTGT	393	661	583	1175	989	2495
tD(GUC)J4	10	+	541508	541579	2736	923	TTTGTTATATAATAACAGAAAATCCAGATTTGTACAGAAAGAAAAGATGTCCACGAGGTCTCTTATCGGGCTACAGTCTTGCTCGTACGCTGCAGGTCGAC	TGCAAAAAGTATGTTATATGTAACCGCAACAGTAGCCAAAAAAATCGGTGTCGGTCTCGTAGATGAGCGCGTCCCAGTCTATATCGATGAATTCGAGCTCG	TATCGGGCTACAGTCTTGCT	tag_13841_st	ATGAGCGCGTCCCAGTCTAT	tag_13299_st	TTACATTATCAATCCTTGCGTTTC	CGCCCATTCTGACCATTAAA	CAGATCGGGGTTCAATTCC	CTGGAAAGCACGAACAATCA	254	522	419	1011	686	2192
tD(GUC)L2	12	+	793918	793989	3242	2346	TACTATGAATTGCGTTTTGACACAGGAAACGCTAATGTAATATAAGATGTCCACGAGGTCTCTATGTACGATGGGGCAGTCCTCGTACGCTGCAGGTCGAC	GTCGAACTATACCTCTTGTGGCTCAAAAAAAAAAAAATGAAAAATCGGTGTCGGTCTCGTAGGGAGCCGATTGACCGTCTATATCGATGAATTCGAGCTCG	ATGTACGATGGGGCAGTCCT	tag_13685_st	GGAGCCGATTGACCGTCTAT	tag_13300_st	GGTGGAAGGCTGTCGTATCT	CGCCCATTCTGACCATTAAA	CAGATCGGGGTTCAATTCC	GATAACCAATTTTACCAAAGCTCAA	405	673	558	1150	976	2482
tD(GUC)M	13	+	463554	463625	945	1202	ATGGTATTAGATGGACTGGTAAAAGTACAAAACTTCAGAAATTTGGATGTCCACGAGGTCTCTTCGACGGTCTAACAGGGTCTCGTACGCTGCAGGTCGAC	ACTTTGTGATGATCAAACAACACCCACCTGGTCTGATAAAAAAATCGGTGTCGGTCTCGTAGACCGACCTGGAATCAGTGCTATCGATGAATTCGAGCTCG	TCGACGGTCTAACAGGGTCT	tag_13949_st	ACCGACCTGGAATCAGTGCT	tag_13828_st	TCAATCCTTGCATTTCAGCA	CGCCCATTCTGACCATTAAA	CAGATCGGGGTTCAATTCC	TTCCTTGGCTCCTGGTAAAA	265	533	416	1008	694	2200
tD(GUC)N	14	-	519099	519169	254	6917	ACTAGTAACGTAAATACTAGTTAGTAGATGATAGTTGATTTTTATGATGTCCACGAGGTCTCTCAGAATGCCCTATTAGTCGACGTACGCTGCAGGTCGAC	ACCGTGAAAAAAGCTCGTCTGACGCGGAAACGTGCGGCAAAAAATCGGTGTCGGTCTCGTAGCCTAAGTTCGGATGATAGCTATCGATGAATTCGAGCTCG	CAGAATGCCCTATTAGTCGA	tag_1325_st	CCTAAGTTCGGATGATAGCT	tag_13741_st	CAGATGGATTGGCTTGGTTT	CGCCCATTCTGACCATTAAA	CAGATCGGGGTTCAATTCC	CGCCTGGAGTCAAAGAAGTG	612	881	598	1190	1223	2730
tD(GUC)O	15	+	571958	572029	1151	809	ATGAAACAAGTATTAATAAAAACACCGTTAACCCAACAATTAAAAGATGTCCACGAGGTCTCTAGGGACTATCGGACTACACTCGTACGCTGCAGGTCGAC	TTCGGCATCACAAAGTTCGAGAACACATCAAATCAGCAAAAAAATCGGTGTCGGTCTCGTAGTTTACCGGGCCCAGGTCTATATCGATGAATTCGAGCTCG	AGGGACTATCGGACTACACT	tag_13422_st	TTTACCGGGCCCAGGTCTAT	tag_13301_st	GGCAACTGAAATGCAAGGA	CGCCCATTCTGACCATTAAA	CAGATCGGGGTTCAATTCC	TACAAAACCGCAACCAGACC	388	656	434	1026	835	2341
tE(CUC)D	4	-	1017207	1017278	1505	2090	ACATAATGAACGTTTCTTTTAGGTCAAACTATCACCAAGGTACAAGATGTCCACGAGGTCTCTCCTCTAGTGGGATGGTCGATCGTACGCTGCAGGTCGAC	GTAAATGAATCAGCATGTGAATTTTTCTAGAAAATAAAAAAGAAACGGTGTCGGTCTCGTAGCACGGGATAGTCGCTTAGCTATCGATGAATTCGAGCTCG	CCTCTAGTGGGATGGTCGAT	tag_13129_st	CACGGGATAGTCGCTTAGCT	tag_13750_st	AGCATGAGGAGATTTGCTTTTATT	ACGGTGAGAACGTGATGTGA	CGGCTATCACATCACGTTCTC	ACGAACTATGGGGTGGTCAG	504	761	647	1212	1126	2632
tE(CUC)I	9	+	197592	197663	1993	1740	ACTGATATGGTAACATGTTTTTCTATTCAAATCAAGCTAATCAAAGATGTCCACGAGGTCTCTGTTCAGGGACATCATGGTCTCGTACGCTGCAGGTCGAC	AAATACTGCCTAAATAGTCCCTAAAAAAAAAAGAATAAAAAATAACGGTGTCGGTCTCGTAGTGTTTCACGCCGGTCCATCTATCGATGAATTCGAGCTCG	GTTCAGGGACATCATGGTCT	tag_13951_st	TGTTTCACGCCGGTCCATCT	tag_13857_st	CCTTGCATTTCAGCTTCCTC	ACGGTGAGAACGTGATGTGA	ACGGCTATCACATCACGTTCT	GGGAAGATGATTCCACCAAA	275	532	450	1014	699	2205
tE(UUC)B	2	+	645167	645238	2957	312	CTTGACATAGAAAATCTTTAAGGTTAAATCAAACATAAGTTATTAGATGTCCACGAGGTCTCTCAGTCATAGCAGTCTACACTCGTACGCTGCAGGTCGAC	TAATGCAACATTCAAGAAAAATAATGGTATAGAAACAAAAAATAACGGTGTCGGTCTCGTAGGAGTGATCTGGACCTCGTATATCGATGAATTCGAGCTCG	CAGTCATAGCAGTCTACACT	tag_13424_st	GAGTGATCTGGACCTCGTAT	tag_13330_st	TTCCAAAACCGACTCCTGTC	GCGTGATGTGATAGCCGTTA	TGTAACGGCTATCACATCACG	AATCCGGTTCCTGACATCTTT	602	868	389	949	970	2476
tE(UUC)C	3	-	82462	82533	3300	1087	CACCATTAGTTCATCTTTTTATTAAATAATTTTAATAATTTGTTAGATGTCCACGAGGTCTCTCCTTGCAGTCCAGCGTAGATCGTACGCTGCAGGTCGAC	GATATAGTTGAAAAAATCTTTAATTGTAATAGCAGAAAAAAAAAACGGTGTCGGTCTCGTAGACTATCGGCGCACGTTAGCTATCGATGAATTCGAGCTCG	CCTTGCAGTCCAGCGTAGAT	tag_13083_st	ACTATCGGCGCACGTTAGCT	tag_13751_st	ATCAATCCTTGCGTTTCAGC	ACGGTGAAAGCGTGATGTG	TGTAACGGCTATCACATCACG	AGAAGGCTGGAAGCAATACG	344	601	497	1057	811	2317
tE(UUC)E1	5	+	177099	177170	1851	665	CCATGATGATATTCATGAAGAATAAGGTTTTTCAACCTACTTTGAGATGTCCACGAGGTCTCTTCGCCGACTTAGGCATGTCTCGTACGCTGCAGGTCGAC	TCATATGAGGTATGTCAAATTATGATTGTAGCCATCAAAAAAGTACGGTGTCGGTCTCGTAGTCTTGCACGCAGGAGCATCTATCGATGAATTCGAGCTCG	TCGCCGACTTAGGCATGTCT	tag_13953_st	TCTTGCACGCAGGAGCATCT	tag_13859_st	TAAAGAAATGGGGTGGCAAA	GCGTGATGTGATAGCCGTTA	GGGTTCGACTCCCCGTAT	TGACAGGTGCTCCCTTTTCT	599	865	608	1207	1225	2731
tE(UUC)E2	5	+	354934	355005	3236	461	ACTGACGTATTCCATTTTGAGATGCAACACATACGTGTATTGTAAGATGTCCACGAGGTCTCTTTAGGTCACGACAGCGTCCTCGTACGCTGCAGGTCGAC	GTGGCTCCTAACCCCATACATACACTGTATGATGTCAAAAAAGTACGGTGTCGGTCTCGTAGGTAGAGGAGCGCTTCCATCTATCGATGAATTCGAGCTCG	TTAGGTCACGACAGCGTCCT	tag_13688_st	GTAGAGGAGCGCTTCCATCT	tag_13858_st	CTTCTGCAATAGGCGCAATC	GCGTGATGTGATAGCCGTTA	TGTAACGGCTATCACATCACG	AAAGGTTGAGTTCGCCCCTA	352	618	399	959	730	2236
tE(UUC)E3	5	-	487331	487402	2543	3176	AACGAATTTACAATATTCGGAGCCCTAAAAAATTCATGAATTTAAGATGTCCACGAGGTCTCTCGCCTGATACCATGTTAGATCGTACGCTGCAGGTCGAC	TTTCAAAGCTTTTGATCGTAAGCGATTGAAAAAATATAACGAATACGGTGTCGGTCTCGTAGTATTACGCGGACCAGACGCTATCGATGAATTCGAGCTCG	CGCCTGATACCATGTTAGAT	tag_13089_st	TATTACGCGGACCAGACGCT	tag_13754_st	AACCGCAATGTTAAGGCAAA	GCGTGATGTGATAGCCGTTA	TGTAACGGCTATCACATCACG	GCAAGAGAGCTGGTTCCAAA	274	540	651	1211	904	2410
tE(UUC)G1 SOE1	7	+	328583	328654	3252	1953	ATATAGTAATTTACCTTTGTAATGGAATTTTTCCAACAATTATTGGATGTCCACGAGGTCTCTATATAGATGGGCCGCGTCCTCGTACGCTGCAGGTCGAC	ATAATAACTTAACTGGAAAAAACTTTCTCAACTTACGACAAAAAACGGTGTCGGTCTCGTAGACGGAACACCCATGTCGTATATCGATGAATTCGAGCTCG	ATATAGATGGGCCGCGTCCT	tag_13689_st	ACGGAACACCCATGTCGTAT	tag_13331_st	GCTGAAATGCAAGGATTGGT	GCGTGATGTGATAGCCGTTA	TGTAACGGCTATCACATCACG	TAAGAGCAACACCGCTGAAA	590	856	602	1162	1171	2677
tE(UUC)G2	7	-	401527	401598	240	991	CTGACATATCTCATTTTGAGATACAACATTTTCAGTTAATTTGTTGATGTCCACGAGGTCTCTCGACGGGACTGATGTTTCATCGTACGCTGCAGGTCGAC	ATTTTCTTCACGGAACTAACGTGAAAAAAAACTTTCAAAAAAATACGGTGTCGGTCTCGTAGAATTGATGCTCGCCCACGCTATCGATGAATTCGAGCTCG	CGACGGGACTGATGTTTCAT	tag_13046_st	AATTGATGCTCGCCCACGCT	tag_13752_st	CCTTGCACTTCAGCTTCCTC	ACGGTGAAAGCGTGATGTG	TGTAACGGCTATCACATCACG	TCGGTAGCATCCAAAAGTTGA	533	790	587	1147	1090	2596
tE(UUC)G3	7	+	541850	541921	7065	282	ATTGCTATTTAGCTATTTGAAGCCAGAAATTTTCACAGATTACCAGATGTCCACGAGGTCTCTTTGAAAGAGCCGGTTACACTCGTACGCTGCAGGTCGAC	ATATTGACTTTACTACCTCTTTTTCAAGAGGTAAGAAAAAGAACACGGTGTCGGTCTCGTAGACCGACGCCGAATCAGGTATATCGATGAATTCGAGCTCG	TTGAAAGAGCCGGTTACACT	tag_13426_st	ACCGACGCCGAATCAGGTAT	tag_13332_st	GCTGAAACGCAAGGATTGAT	GCGTGATGTGATAGCCGTTA	TGTAACGGCTATCACATCACG	TCCCAACTAGGACGGAAAGA	414	680	397	957	790	2296
tE(UUC)I	9	+	370417	370488	509	216	AATTAGTAGTACATAAGATCGAAGTAGAAAAAATATAGATTATAAGATGTCCACGAGGTCTCTATTCATCGGGACAGTGGTCTCGTACGCTGCAGGTCGAC	CGAAGGCAATATTCGAGCGGATATGAAAAAAATAAAATAAACATACGGTGTCGGTCTCGTAGGCACGCTTCACAGGTTCTATATCGATGAATTCGAGCTCG	ATTCATCGGGACAGTGGTCT	tag_13952_st	GCACGCTTCACAGGTTCTAT	tag_13304_st	CCAACTTTTGCCCCTAACAA	GCGTGATGTGATAGCCGTTA	TGTAACGGCTATCACATCACG	CCAGGTGAAGGGTAAACGAA	421	687	549	1109	949	2455
tE(UUC)J	10	-	115939	116010	310	1235	TTTGGTAAGTAGTACTATTAGGTGTTGAATATTAACCGTTTATAAGATGTCCACGAGGTCTCTCGGATCGACGATGTTAAGATCGTACGCTGCAGGTCGAC	AAACTATTTCAAAAAATAACTATTTAGCTAATCACATAAAAAATACGGTGTCGGTCTCGTAGCCGCGCTTTAATACACGTATATCGATGAATTCGAGCTCG	CGGATCGACGATGTTAAGAT	tag_13052_st	CCGCGCTTTAATACACGTAT	tag_13320_st	AAGTGCGGTTGAGTTCTGGT	ACGGTGAAAGCGTGATGTG	TGTAACGGCTATCACATCACG	TTCTTCGGCTGGTAAGTGTGT	317	574	636	1196	923	2429
tE(UUC)K	11	-	141018	141089	327	1730	TTACATGAGTAATTCCATTACGTTTCAATTTTCTATCCTTTGTAAGATGTCCACGAGGTCTCTCGCCTACGACAATGTACGATCGTACGCTGCAGGTCGAC	ATTAACATCACGCTAGTACTGCTAGATTAAAAATAATAATGAAAACGGTGTCGGTCTCGTAGTTTCTAGGGAAGAGCACGCTATCGATGAATTCGAGCTCG	CGCCTACGACAATGTACGAT	tag_13101_st	TTTCTAGGGAAGAGCACGCT	tag_13753_st	GTGTACCGTGGAGCCCTTT	GCGTGATGTGATAGCCGTTA	TGTAACGGCTATCACATCACG	AAGCGTCGTTCTGGTTTTGT	340	606	414	974	733	2239
tE(UUC)M	13	+	290801	290872	2722	262	CTCGATAAGGAGTTCTCTACGAAAAATATCAACAGTGAAATATAAGATGTCCACGAGGTCTCTTATTGTCAGGCAGGTACACTCGTACGCTGCAGGTCGAC	GGTCGACGTGAAGAAAAAAATTTTCAAATTTCTTCAAAAAGAAAACGGTGTCGGTCTCGTAGTAGTTTATCCCCCCGGTGCTATCGATGAATTCGAGCTCG	TATTGTCAGGCAGGTACACT	tag_13425_st	TAGTTTATCCCCCCGGTGCT	tag_13832_st	CACCAACCAAGCAAGGAAAT	GCGTGATGTGATAGCCGTTA	TGTAACGGCTATCACATCACG	CTCGCTTTTCTCACCAACAA	444	710	616	1176	1039	2545
tE(UUC)P	16	-	210192	210263	2035	1895	GCCGATTAGGCTGACACTTTAACAAAATTTTCTGTCCAATTATTGGATGTCCACGAGGTCTCTCGTGCAGGCAAATAGTTCATCGTACGCTGCAGGTCGAC	AGATTATGCAACAACTTGGAAGGGCGGAAGGAAGCAAAAAGAAAACGGTGTCGGTCTCGTAGCAAAGCACAGACCGTAATCTATCGATGAATTCGAGCTCG	CGTGCAGGCAAATAGTTCAT	tag_13040_st	CAAAGCACAGACCGTAATCT	tag_13848_st	TGATGACTGGTGACTGTTTCTCA	ACGGTGAAAGCGTGATGTG	TGTAACGGCTATCACATCACG	CGCGTGCATTGAAAAATAAA	339	596	493	1053	802	2308
tF(GAA)B	2	+	36398	36488	7971	565	TAATAATAAATCTATTTCATCGGACTAAAAGTCCATTAGTTGTAAGATGTCCACGAGGTCTCTATTGATTGCCGGGTCGCACTCGTACGCTGCAGGTCGAC	AACAGGCCTAGAAATGAAAAAAAAAAGAATGCTAGCAAAAAGGAACGGTGTCGGTCTCGTAGAGCGGCCTACCACCTTGTATATCGATGAATTCGAGCTCG	ATTGATTGCCGGGTCGCACT	tag_13444_st	AGCGGCCTACCACCTTGTAT	tag_13352_st	CTTCTGCAATAGGCGCAATC	CTCCAGATGACTTGACCGAAG	CGGTCAAGTCATCTGGAGGT	AACGTCAATGGGAAAGATGG	356	591	383	959	722	2209
tF(GAA)D	4	-	1095370	1095461	1607	6723	GCATATATAAAAGACAGACCACCCATGAAGTTCCGTCTTATGTTAGATGTCCACGAGGTCTCTGCGAGTACCTATCACACTATCGTACGCTGCAGGTCGAC	TATTATTAACAATCCAAAAATTGCGTCACTGGGAAAAAATAAAAACGGTGTCGGTCTCGTAGGGGACCTTTCAGCATTCGCTATCGATGAATTCGAGCTCG	GCGAGTACCTATCACACTAT	tag_13263_st	GGGACCTTTCAGCATTCGCT	tag_13786_st	CTTGCGTTTCAGCTTCCTCT	GCGAACTCTGTGGATCGAA	TGTTCGATCCACAGAGTTCG	TGGTGGAAGAAAAACGGACT	527	734	418	1018	925	2411
tF(GAA)F	6	-	157916	158007	1771	1292	TATAGTCCTATAGTTCCTGTAACAATGAATTTTTCATAAATAGAAGATGTCCACGAGGTCTCTGCGCGGCTTAATTACACTATCGTACGCTGCAGGTCGAC	GGCACTGAAAAAATTAAGGACCAACCCCGAAGAGCAAAAAATGAACGGTGTCGGTCTCGTAGTTCGCTAGTCCAGCTTCGCTATCGATGAATTCGAGCTCG	GCGCGGCTTAATTACACTAT	tag_13264_st	TTCGCTAGTCCAGCTTCGCT	tag_13787_st	TGGACGACGGTTTATCCAAT	CTCTCCCAACTGAGCTAAATCC	AGCGGATTTAGCTCAGTTGG	GAAAAGCACCCCGAAAGATT	327	601	465	994	768	2254
tF(GAA)G	7	-	440716	440807	653	2102	CTTTATGTGGTTTGTACGTGTTGATGATTTTCCTATAAAATATATGATGTCCACGAGGTCTCTTGAGGCAGGTACAGCACTATCGTACGCTGCAGGTCGAC	AACTGGAAAAAACTAAAAATTTTTTGAAGCCCGTATGGCTTATTACGGTGTCGGTCTCGTAGCGCAGGGTAGACATTTCGCTATCGATGAATTCGAGCTCG	TGAGGCAGGTACAGCACTAT	tag_13265_st	CGCAGGGTAGACATTTCGCT	tag_13788_st	CAAGAATGTAAGTTTGGCATTGA	CGCTCTCCCAACTGAGCTA	CAAGTTATCTGGAGGTCCTGTGT	TGGAAGGCAGAAAAGACACC	329	601	631	1211	985	2471
tF(GAA)H1	8	-	237848	237939	844	1159	TCAAATGAGTTATCTTTTTAACATCAGAATTTCAACAAATAGTAAGATGTCCACGAGGTCTCTTGGTGACCGAACCGCACTATCGTACGCTGCAGGTCGAC	TACAAATATTTTTTAAAAAAAAAAAATAGTGTGTGTTTACAAAAACGGTGTCGGTCTCGTAGAAGACTTCTCGAGTTTCGCTATCGATGAATTCGAGCTCG	TGGTGACCGAACCGCACTAT	tag_13266_st	AAGACTTCTCGAGTTTCGCT	tag_13789_st	GCACCATACAACAGCAATCC	CGCTCTCCCAACTGAGCTA	AGCGGATTTAGCTCAGTTGG	ATAAGTGGGCTCCATGCAAA	416	688	474	1003	864	2350
tF(GAA)H2	8	-	358478	358569	1917	1612	AACCTATTCTATGTAGATATGAAGGGAACTGATAACAAATAGTAAGATGTCCACGAGGTCTCTACCCGATTCACGTAGACTATCGTACGCTGCAGGTCGAC	TATAAGTATTAAATAAACTAATGATTTTAAATCGTTAAAAAAATACGGTGTCGGTCTCGTAGCTTATGGAGCATGCCAGGCTATCGATGAATTCGAGCTCG	ACCCGATTCACGTAGACTAT	tag_13267_st	CTTATGGAGCATGCCAGGCT	tag_13790_st	CAGCAGTGTCAAGCCAAATG	GCTCTCCCAACTGAGCTAAATC	AGCGCCAGACTGAAGAAAAA	TGCAAAACAAGCTATGGTAACG	538	811	405	957	941	2427
tF(GAA)M	13	+	352280	352370	307	233	GAGAATGGGCTCGCATCCCAGAGCGCAACTAATATATGAATATAAGATGTCCACGAGGTCTCTACTCATAGGCAGTGGAAGCTCGTACGCTGCAGGTCGAC	TCATCACCAAAAGAGGAAAACGAATGAAAAGTAAAAAAAAATTAACGGTGTCGGTCTCGTAGGGGCCGATTCAATATGATCTATCGATGAATTCGAGCTCG	ACTCATAGGCAGTGGAAGCT	tag_13708_st	GGGCCGATTCAATATGATCT	tag_13880_st	AACTCTTCCGCACCAATACG	TTTCTTCAGTCTGGCGCTCT	AGAGCGCCAGACTGAAGAAA	TACTTGTGTCGCTGCTGTCC	629	887	531	1082	1141	2628
tF(GAA)N	14	+	374896	374959	204	362	ATTCCTAGGGACGACAAAAAGGCGGAAAAGGTTTCAGAAAAATAAGATGTCCACGAGGTCTCTAAACGTGACTCGCAGGCACTCGTACGCTGCAGGTCGAC	CTGAACACATCCACATGCGTAATCATTAAAAAAAATTTTTCAAATCGGTGTCGGTCTCGTAGCCGATATAGGCACGTTGTATATCGATGAATTCGAGCTCG	AAACGTGACTCGCAGGCACT	tag_13445_st	CCGATATAGGCACGTTGTAT	tag_13353_st	TTGCTCCACTTGCTCTCGTA	TTTCTTCAGTCTGGCGCTCT	CGGTCAAGTCATCTGGAGGT	ATTTGGGAGCTGGTTACGTG	332	590	523	1099	861	2348
tF(GAA)P1	16	-	560198	560289	1813	3479	CCTGTATTGAGTTTTTAGCTAAGGTGGTTAGAGCATAGAAATTGAGATGTCCACGAGGTCTCTTAGGCAGCCCAGACGACTATCGTACGCTGCAGGTCGAC	ACTTGCAAGAGTTCGTCAATTCATGGAAAAATACAAAAATAGAAACGGTGTCGGTCTCGTAGATTTGGCAGTCCTCCAGGCTATCGATGAATTCGAGCTCG	TAGGCAGCCCAGACGACTAT	tag_13268_st	ATTTGGCAGTCCTCCAGGCT	tag_13791_st	CCTTGCACTTCAGCTTCCTC	CGCTCTCCCAACTGAGCTA	AGCGGATTTAGCTCAGTTGG	TCTGCGCGAACATTTTGTAG	349	621	475	1004	798	2284
tF(GAA)P2	16	-	622540	622631	1282	896	ACCATTTATAAAGCACAAGAATGCTTGTTTATTTCATTCTGATATGATGTCCACGAGGTCTCTGATACGAGCCAACGGACTATCGTACGCTGCAGGTCGAC	AGTTCAAGAACCAACTTTCCGCAGTTGGCAGGTCGAAAAAATAAACGGTGTCGGTCTCGTAGATTCATCTGGTGTGCAGGCTATCGATGAATTCGAGCTCG	GATACGAGCCAACGGACTAT	tag_13269_st	ATTCATCTGGTGTGCAGGCT	tag_13792_st	AGTAATTGCGCTCACCCATC	TTTCTTCAGTCTGGCGCTCT	CAAGTTATCTGGAGGTCCTGTGT	TGTCTGCTTCCCTCTTTTTGA	527	785	488	1068	1026	2512
tG(CCC)O SUF5	15	-	594354	594425	1297	7917	ATTAATAGTATATAACGTGCTGAGTCTTCCCAAATTGATTGAAACGATGTCCACGAGGTCTCTCTTATCCGAGCGTAGCAGATCGTACGCTGCAGGTCGAC	AATAACAAAACGTCTGAATTTCCTAGTCTGTTTTGCAAAAACAGACGGTGTCGGTCTCGTAGTACTTTCTGCCAGGGACGCTATCGATGAATTCGAGCTCG	CTTATCCGAGCGTAGCAGAT	tag_13054_st	TACTTTCTGCCAGGGACGCT	tag_13758_st	CGTGCTGAGTCTTCCCAAAT	ACTTGCGCGTTTCAATCAAT	CGCAAGTGGTTCAGTGGTT	TGCTGGTCAAATGAAAGGTG	37	327	549	1100	580	2086
tG(GCC)B	2	-	197629	197699	3507	4049	ATACTGACGTATCTCATTTTGAGATACAACACTTCCAAGAAATAAGATGTCCACGAGGTCTCTGACGCGATAGACAGTCAGATCGTACGCTGCAGGTCGAC	ATAACGTCGTTTATTTTTTATATAAAAATAAAAATCAAAAAGAATCGGTGTCGGTCTCGTAGATTCAGGCTGCGCATACGCTATCGATGAATTCGAGCTCG	GACGCGATAGACAGTCAGAT	tag_13062_st	ATTCAGGCTGCGCATACGCT	tag_13760_st	CGTGCGGTGTAAGAAGATGA	CGTTGGATTTTACCACTAAACCA	GCGCAAGTGGTTTAGTGGTAA	TTGATGACTGTTTCTCAACTCCA	516	784	462	1013	949	2456
tG(GCC)C SUF16	3	-	142701	142771	531	863	TACATAATATTGTTGCTTTTCTCGAATCATGTATCAAGATTACTAGATGTCCACGAGGTCTCTCTAGAATCAGCATGCGAGATCGTACGCTGCAGGTCGAC	TGGGAAAAAGAAAAAAAAAAAAAATAGTATATAAAGTAAAAAAGACGGTGTCGGTCTCGTAGTTAGTGCTCGAACCGACGCTATCGATGAATTCGAGCTCG	CTAGAATCAGCATGCGAGAT	tag_13072_st	TTAGTGCTCGAACCGACGCT	tag_13756_st	ATCGGCCACACACTCTCTCT	CGTTGGATTTTACCACTAAACCA	GCGCAAGTGGTTTAGTGGTAA	CTCCACTGTTCGCTTCTGGT	396	664	597	1148	964	2471
tG(GCC)D1	4	+	83548	83618	3136	652	CTTGTATTAGTTGTTATCCAACGCTCCCGTTTTCAAGTTCACTTAGATGTCCACGAGGTCTCTATAGATTCGCGTCACTGTCTCGTACGCTGCAGGTCGAC	AGTGCAAAGTGGAAAACAATGTGGAAAAAGAAAAAAAATTAAACTCGGTGTCGGTCTCGTAGACTTGTAGAGAAGGGCATCTATCGATGAATTCGAGCTCG	ATAGATTCGCGTCACTGTCT	tag_13955_st	ACTTGTAGAGAAGGGCATCT	tag_13862_st	GGAGACCACCTCATTTTCCA	CGTTGGATTTTACCACTAAACCA	GCGCAAGTGGTTTAGTGGTAA	AAAGGACCATGCCAGTCAAC	550	818	633	1184	1154	2661
tG(GCC)D2	4	+	992832	992902	13623	232	TTGAGGTATGGTATGTCGATGATAAAACAAATCCAACAATTGTGAGATGTCCACGAGGTCTCTATGTAGGACTGGGCACCACTCGTACGCTGCAGGTCGAC	AGTCTCTAAACCCTTCATATTGATCGCTAATAGTTGCTAAAAAAGCGGTGTCGGTCTCGTAGAGAAATGCAACGCCCGGTATATCGATGAATTCGAGCTCG	ATGTAGGACTGGGCACCACT	tag_13428_st	AGAAATGCAACGCCCGGTAT	tag_13335_st	ATCAATCCTTGCGTTTCAGC	CGTTGGATTTTACCACTAAACCA	AGCGCAAGTGGTTTAGTGGTA	TGCTGCTTTCTTTGCTGTGT	356	624	577	1127	903	2410
tG(GCC)E	5	-	61890	61960	1039	1768	TATGTTCTGTGGGTTCTTTATTTTTTGAATAACAACAAATAGTAAGATGTCCACGAGGTCTCTGACTATCGACAACTTCGGATCGTACGCTGCAGGTCGAC	TAGTTGACAGTTGCTCATGAAATGAATGGATTAAAAAAATAAAGCCGGTGTCGGTCTCGTAGGGTATGACTCCACCTACGCTATCGATGAATTCGAGCTCG	GACTATCGACAACTTCGGAT	tag_13149_st	GGTATGACTCCACCTACGCT	tag_13761_st	TTGATAGCTGTTTCCCATCGT	CGTTGGATTTTACCACTAAACCA	GCGCAAGTGGTTTAGTGGTAA	TGCAAGAAAAGGATTGCTGA	599	867	469	1020	1039	2546
tG(GCC)F1 SUF20	6	+	162228	162298	1693	190	ACATTATTATTGATTTATCCAAGGATAGTTTTCACAAGAAAACAAGATGTCCACGAGGTCTCTGGACCCGATTTCTTTACACTCGTACGCTGCAGGTCGAC	AAAATTTTCAGGAACAAAAAAATAAAAATCAGAAAAAAAAGAAACCGGTGTCGGTCTCGTAGTTGGAGTCACCTCCGCATCTATCGATGAATTCGAGCTCG	GGACCCGATTTCTTTACACT	tag_13427_st	TTGGAGTCACCTCCGCATCT	tag_13861_st	TGGATTTTCCCTCGTTGACT	CGTTGGATTTTACCACTAAACCA	GCGCAAGTGGTTTAGTGGTAA	CACCCGCATCAATCAATAAA	545	813	440	991	956	2463
tG(GCC)G1	7	+	845649	845719	1795	686	GACATTACCCCATTGCATGATGCAATAATCTCATATAAATAACAAGATGTCCACGAGGTCTCTAATGATGACTCCCCGGTCCTCGTACGCTGCAGGTCGAC	ATTTTTAGCTATTTTAGTTCCCATACTTGGGGATGGAAAAAACATCGGTGTCGGTCTCGTAGAACATAACGTGCGTGCATCTATCGATGAATTCGAGCTCG	AATGATGACTCCCCGGTCCT	tag_13692_st	AACATAACGTGCGTGCATCT	tag_13863_st	TTGTCATTCTGGGCTTCAAA	GGATTTTACCACTAAACCACTTGC	GCGCAAGTGGTTTAGTGGTAA	CCTTCAATCACCTTGGGAAA	495	767	442	993	912	2419
tG(GCC)G2	7	-	930953	931023	6257	1518	TAAAACTTATTCAGATCTCTTCAACCATTAAGATATAATCAGTAAGATGTCCACGAGGTCTCTGATGACTACTCCCCACGGATCGTACGCTGCAGGTCGAC	AGCATGTCAAACTTTACTATTCAGGGAAAAAAGAAAAGAAAAAAACGGTGTCGGTCTCGTAGATTCTGGACGGGAGTACGCTATCGATGAATTCGAGCTCG	GATGACTACTCCCCACGGAT	tag_13143_st	ATTCTGGACGGGAGTACGCT	tag_13763_st	TTGGCGTTACTTTTCGGATG	CGTTGGATTTTACCACTAAACCA	GCGCAAGTGGTTTAGTGGTAA	CGATGTATTGGAGATGGTGGT	616	884	505	1056	1092	2599
tG(GCC)J2	10	+	531828	531898	1967	164	TATTTTGTAACTGTACACATAATTGACACGTTTAACAATTAGTGAGATGTCCACGAGGTCTCTTATACCGGATCGAGCTGTCTCGTACGCTGCAGGTCGAC	TCCATAAATAAGTTTTCTTATTTTCCAGAAAAAAAGAAAAGAAACCGGTGTCGGTCTCGTAGGCAGATTCTCGACTCGGTATATCGATGAATTCGAGCTCG	TATACCGGATCGAGCTGTCT	tag_13956_st	GCAGATTCTCGACTCGGTAT	tag_13336_st	GTGAAGTTTCGGGTGGTGTT	CGTTGGATTTTACCACTAAACCA	GCGCAAGTGGTTTAGTGGTAA	GCGTGTCAGAAATGTGGCTA	600	868	594	1145	1165	2672
tG(GCC)M	13	-	183898	183968	2424	7799	ATATGGTTAGTTAACTCTATGTTCCAACAAATACCAATAAAGATCGATGTCCACGAGGTCTCTGCCGATTTATGATACGCGATCGTACGCTGCAGGTCGAC	ACAACTTCTAAACATTAAATATTTTTGGTGAATTAAAAAAAAATACGGTGTCGGTCTCGTAGGAGCCTCTACGGAGTTCTATATCGATGAATTCGAGCTCG	GCCGATTTATGATACGCGAT	tag_13118_st	GAGCCTCTACGGAGTTCTAT	tag_13303_st	CCTTGCACTTCAGCTTCCTC	CGTTGGATTTTACCACTAAACCA	GCGCAAGTGGTTTAGTGGTAA	GGACCCCGAAGGAGTACC	363	631	555	1106	889	2396
tG(GCC)O1	15	-	226611	226681	536	1933	TACTGAGGTATGCTATCCTGAGATGTAATACCATCAAGAAATTCAGATGTCCACGAGGTCTCTGCCTTTAGACAACGCGATATCGTACGCTGCAGGTCGAC	TATATACATTGCAATGTTGAAATTAAAAAAATTCAACAAAAAATTCGGTGTCGGTCTCGTAGTAGTCGGCTCGATAGGTGCTATCGATGAATTCGAGCTCG	GCCTTTAGACAACGCGATAT	tag_13244_st	TAGTCGGCTCGATAGGTGCT	tag_13831_st	GAAAGGGGAGCATCAAACAA	CGTTGGATTTTACCACTAAACCA	AGCGCAAGTGGTTTAGTGGT	AAGATATGGTGGAGGCGTGT	444	712	651	1201	1065	2572
tG(GCC)O2 SUF17	15	+	282164	282234	666	3192	ATATCGCTTAAATAGAGGAGTGGATGCTCAGGATAACATGAAAGCGATGTCCACGAGGTCTCTCGGAGTACGCAAGTATGTCTCGTACGCTGCAGGTCGAC	AAAATGGCAAAAAAATTGACATTTTGGTGGTGGACAAAAAAGAAACGGTGTCGGTCTCGTAGCCTGCTCTTAGATGAGGTATATCGATGAATTCGAGCTCG	CGGAGTACGCAAGTATGTCT	tag_13954_st	CCTGCTCTTAGATGAGGTAT	tag_13333_st	CGATGAGATGAGGCCATTTT	GGATTTTACCACTAAACCACTTGC	GCGCAAGTGGTTTAGTGGTAA	ATGTCGGGCAAGTAATGAGG	617	889	558	1109	1150	2657
tG(GCC)P1	16	+	572269	572339	891	679	ATCTATTTAGTAGCAGGGTGACATGTTACTCCCACACAATACTTCGATGTCCACGAGGTCTCTTGAGATAGTTGCCTACCACTCGTACGCTGCAGGTCGAC	ACCGGAAGCGTTAACGTTACGCCCTTCAGGGCGAGGGGGAAAAATCGGTGTCGGTCTCGTAGCGACTCTTTGAAATCGACCTATCGATGAATTCGAGCTCG	TGAGATAGTTGCCTACCACT	tag_13429_st	CGACTCTTTGAAATCGACCT	tag_13600_st	CGGAAGTCAAAAAGGAAGGA	CGTTGGATTTTACCACTAAACCA	GCGCAAGTGGTTTAGTGGTAA	CAATCAAGTGCTGGTGCTGT	491	759	498	1049	960	2467
tG(UCC)G SUF4	7	+	779616	779687	4423	712	GCCTATATATGGAAAACGAGCTTTTAGAGCTTTCAAGTTAACCCCGATGTCCACGAGGTCTCTACGGATCGTTCACAGGTCCTCGTACGCTGCAGGTCGAC	TGCAAGATATTAGGAGAAAAAGTATGAAAATTAAAAAAGTAATCTCGGTGTCGGTCTCGTAGACTCGCGTGACATTAGGTATATCGATGAATTCGAGCTCG	ACGGATCGTTCACAGGTCCT	tag_13691_st	ACTCGCGTGACATTAGGTAT	tag_13334_st	AAATGTTGAAAGTTCTTCTGCAAG	TTGGAAGGGTGGGATGATAA	TTATCATCCCACCCTTCCAA	CAGGAAAATGGGGTGGTAAA	391	651	398	966	770	2276
tG(UCC)N SUF6	14	-	96241	96312	1018	7790	CCATCACTTATTACCTCGTCATTACAGTTACACCATCCAACACATGATGTCCACGAGGTCTCTGAAGGAGTGTAACATCCGATCGTACGCTGCAGGTCGAC	TGTCGATATAATACTTGAAAATGCAAGCAATGCCATCAAAAAATTCGGTGTCGGTCTCGTAGCGAACGTGGTATAATACGCTATCGATGAATTCGAGCTCG	GAAGGAGTGTAACATCCGAT	tag_13112_st	CGAACGTGGTATAATACGCT	tag_13759_st	AGGAAGCTGAAGTGCAAGGA	TTGGAAGGGTGGGATGATAA	GTTATCATCCCACCCTTCCA	GAAGGGGAGGGGGAAGTAAT	552	812	583	1150	1115	2621
tG(UCC)O SUF1	15	-	110962	111033	665	853	TTATAGTGATTGAGATCAGTTTCACCAACTAATAACAATTAACCCGATGTCCACGAGGTCTCTCTACGTTGAGGAGTCGTGATCGTACGCTGCAGGTCGAC	TTTCACGTCCCGGAGGAAAAAAAGTTTGATAAGAAAGTAAAAATACGGTGTCGGTCTCGTAGTTAGTCACGGCCTAGACGCTATCGATGAATTCGAGCTCG	CTACGTTGAGGAGTCGTGAT	tag_13205_st	TTAGTCACGGCCTAGACGCT	tag_13755_st	TGGTGCATATCCCACAAAGA	TTGGAAGGGTGGGATGATAA	GTTATCATCCCACCCTTCCA	AAACATTGCTGATGGTGTCG	357	617	540	1107	877	2383
tH(GUG)E1	5	+	207357	207428	2106	1046	ATTGAGTATATATAACCTTGAAAAGGTTTTATTTTATATAAGTTCGATGTCCACGAGGTCTCTTATGAGCGTACAGTCTGTCTCGTACGCTGCAGGTCGAC	CTTCACACGACATTCTTTGTATATTAAGAATATAAAAAATAAATACGGTGTCGGTCTCGTAGATGGCATCCGACCAGGGTATATCGATGAATTCGAGCTCG	TATGAGCGTACAGTCTGTCT	tag_13957_st	ATGGCATCCGACCAGGGTAT	tag_13337_st	ACTCATTTATTTCCCATTGATGC	GCCATCTCCTAGAATCGAACC	ACCCTGGTTCGATTCTAGGAG	ATTGCCTATGCCAACCACTC	298	525	434	1029	707	2213
tH(GUG)E2	5	-	434541	434612	2046	3191	GGTATTACTCGAGCCCGTAATACAACAGTTCTCCATTGAAAAGTCGATGTCCACGAGGTCTCTGCTCCGCTAGAATCTCATATCGTACGCTGCAGGTCGAC	TCAATCACGTCAACCTGTCTAAAATAAGACAGGTAAAAAAGAAAACGGTGTCGGTCTCGTAGCATCGTTGACGATGACGTATATCGATGAATTCGAGCTCG	GCTCCGCTAGAATCTCATAT	tag_13236_st	CATCGTTGACGATGACGTAT	tag_13321_st	TCACCCATTCCCAATATACCA	GGTTTCATCGGCCACAAC	ACCCTGGTTCGATTCTAGGAG	AACCGCGAAAAAGCATAAGA	573	823	406	1001	977	2483
tH(GUG)G1	7	-	110625	110696	2467	4561	ATGTATATAATTCTGAGATATTGAGTAAACACTCAATAATTACCTGATGTCCACGAGGTCTCTGGATTCAGCCGTACGACGATCGTACGCTGCAGGTCGAC	ATCAATGACATGACTACATTTACCAATGTATAGTAGTAAAAAAATCGGTGTCGGTCTCGTAGCCCGGTCATTAAGGTAATCTATCGATGAATTCGAGCTCG	GGATTCAGCCGTACGACGAT	tag_13095_st	CCCGGTCATTAAGGTAATCT	tag_13849_st	CTTCTGCAATAGGCGCAATC	CCATCTCCTAGAATCGAACCA	ACCCTGGTTCGATTCTAGGAG	TTGAATTACCTGACGCGATG	345	573	473	1068	794	2300
tH(GUG)G2	7	+	319781	319852	2439	1930	TGACATATCTCATTTTGAGATACAACAAAGTTCATAAAGAAATTAGATGTCCACGAGGTCTCTTGTGTAGGCAACGACCCACTCGTACGCTGCAGGTCGAC	GTCGGGTTTGGAAAGTTGTGCGAGAAGGCGAAATTTCGGAAAAAACGGTGTCGGTCTCGTAGTATGCAGTTCCCCAGGACCTATCGATGAATTCGAGCTCG	TGTGTAGGCAACGACCCACT	tag_13430_st	TATGCAGTTCCCCAGGACCT	tag_13601_st	TCTTTGCATTTCAGCTTCCA	GCCATCTCCTAGAATCGAACC	ACCCTGGTTCGATTCTAGGAG	CGTGGAAAGAAGCTGCACTA	644	871	433	1028	1052	2558
tH(GUG)K	11	-	313401	313472	3202	1340	ATTCAACCAGATGTGCAGATGTAACCAAAAACTTCACAGTTGTTTGATGTCCACGAGGTCTCTGGCCCGACGCAATATTTCATCGTACGCTGCAGGTCGAC	AAATAAAAACGGACAGACCATGAAGGCTAAAGGAAAAAAATAAAACGGTGTCGGTCTCGTAGCGAGGTGTACGGATTACGCTATCGATGAATTCGAGCTCG	GGCCCGACGCAATATTTCAT	tag_13045_st	CGAGGTGTACGGATTACGCT	tag_13765_st	AAATGGGGAAATGGAGTGGT	GCCATCTCCTAGAATCGAACC	TGGTTCGATTCTAGGAGATGG	GGGATCTTGTCACCTTTGGA	636	863	622	1221	1237	2743
tH(GUG)M	13	+	363064	363135	7680	3570	AATGTACTGTATAGCCCAGCATGTTTTTCTTAACAATCCAAGTTTGATGTCCACGAGGTCTCTTAACCGCTCGACATGTGTCTCGTACGCTGCAGGTCGAC	CGTTTGTTGCCTTCCCTTTTTCTTTTCTTTGAAAAAAAAAGAAAACGGTGTCGGTCTCGTAGACCTGGTACTTGATGGGTATATCGATGAATTCGAGCTCG	TAACCGCTCGACATGTGTCT	tag_13958_st	ACCTGGTACTTGATGGGTAT	tag_13338_st	CCTTGCACTTCAGCTTCCTC	GCCATCTCCTAGAATCGAACC	ACCCTGGTTCGATTCTAGGAG	CCAAACAGACCGAAGAGAGG	348	575	485	1080	808	2314
tI(AAU)B	2	+	197494	197567	3372	4181	TGTCCCTGATGTTTTTCTTCTTCAAGCACGTTAACCAGTAATCAAGATGTCCACGAGGTCTCTACGAGCGTCACATCGAGTATCGTACGCTGCAGGTCGAC	ATTTTTATATAAAAAATAAACGACGTTATTTGAATTGCAAAAAAACGGTGTCGGTCTCGTAGAGGGCTTCATAACCTCATCTATCGATGAATTCGAGCTCG	ACGAGCGTCACATCGAGTAT	tag_13314_st	AGGGCTTCATAACCTCATCT	tag_13866_st	GAGCAATACGCTGTTTTTCCA	GATCCCCGCGTTATTAGCA	TAATAACGCGGGGATCAGC	GCCATTGATATTTTGTGGCATT	611	860	595	1176	1191	2695
tI(AAU)D	4	-	668007	668080	1003	2954	TACTGACATATCTCATTTTGAGATACAACACTTTCGATCCAAATTGATGTCCACGAGGTCTCTGTGTGCTCCAAATACCCGATCGTACGCTGCAGGTCGAC	GATAGTAAAGAGCTATTTTTAACAATAGAGGAGAAAAAATAAAAACGGTGTCGGTCTCGTAGATTGATATGCGGTCACCGCTATCGATGAATTCGAGCTCG	GTGTGCTCCAAATACCCGAT	tag_13106_st	ATTGATATGCGGTCACCGCT	tag_13766_st	TTCTTGCACTTCAGCTTCCA	GATCCCCGCGTTATTAGCA	TAATAACGCGGGGATCAGC	TCAAAACGAGGCAAAAGACA	626	875	626	1207	1237	2741
tI(AAU)E1	5	-	443202	443275	1383	6199	ATGGTTTGTTACCTTCTTTCCAGTAAAAGTATTTCATTAAAATTTGATGTCCACGAGGTCTCTTACCTATGAGGGGGCACGATCGTACGCTGCAGGTCGAC	TTCTTTAAGTTGAACAAAAAGACAAAAAGATTTTCAAAAAAAATACGGTGTCGGTCTCGTAGTTATAGTTACCGAGACCGCTATCGATGAATTCGAGCTCG	TACCTATGAGGGGGCACGAT	tag_13092_st	TTATAGTTACCGAGACCGCT	tag_13767_st	CGAGACCAAGAAGAACATTGC	GGTCTCTAGCGGGATCGAA	TAATAACGCGGGGATCAGC	CGGCAGCGGAATATAAGAAG	640	865	552	1133	1153	2657
tI(AAU)G	7	+	739122	739195	919	749	CACCTGTATTATCAAACTATTAATCAGTGACTTCCGAAAAAAATAGATGTCCACGAGGTCTCTTGAGTTCCTGGACCGTTGCTCGTACGCTGCAGGTCGAC	TTCTATGATTTATCGGGATCTTATATTTGCATTCTAAAAAGTAAACGGTGTCGGTCTCGTAGCCGTGAGTATGATTGGGTATATCGATGAATTCGAGCTCG	TGAGTTCCTGGACCGTTGCT	tag_13842_st	CCGTGAGTATGATTGGGTAT	tag_13339_st	ATGGCGGGCGTAAAATAAA	GGTCTCTAGCGGGATCGAA	AATAACGCGGGGATCAGC	AATGAACCCAATACGCAAGG	521	746	446	1028	929	2433
tI(AAU)I2	9	+	210665	210738	6012	1267	CGGTATTACTCGAGCCCGTAATACAACAGAACATATGAAATATCTGATGTCCACGAGGTCTCTAGATGAGTAGGTCTCCCACTCGTACGCTGCAGGTCGAC	ACTTACTGTCTTAGCAGTAGTAGAAGAGATTTGTACAAAAAAATACGGTGTCGGTCTCGTAGGACTGGTCATGATCTCATCTATCGATGAATTCGAGCTCG	AGATGAGTAGGTCTCCCACT	tag_13431_st	GACTGGTCATGATCTCATCT	tag_13867_st	CATGAGACAAAACCCGACCT	GATCCCCGCGTTATTAGCA	TAATAACGCGGGGATCAGC	ACCCCTTAGATTTCCCCAGA	310	559	376	957	671	2175
tI(AAU)L1	12	+	734802	734875	2260	2673	ATATGTCCTATAAGATGTTAACTTGCTCAACATTCAACAAAGTTTGATGTCCACGAGGTCTCTCTCATGGTACAACGTGTCCTCGTACGCTGCAGGTCGAC	AGTAATAAGTGCACCGTCTGTCAGACGGTCGAATTTAAAAATAAACGGTGTCGGTCTCGTAGACTCAGGCTCCACGTGGTATATCGATGAATTCGAGCTCG	CTCATGGTACAACGTGTCCT	tag_13695_st	ACTCAGGCTCCACGTGGTAT	tag_13340_st	CCTTGCACTTCAGCTTCCTC	ATCCCCGCGTTATTAGCAC	TAATAACGCGGGGATCAGC	TAGCTGAATTGGCTCCAGGT	309	559	537	1118	832	2336
tI(AAU)L2	12	-	1052071	1052144	8073	1485	ACAGGTTATGGTTTTCGTGTGACCTTGTTTTGACGTCCTTTTCATGATGTCCACGAGGTCTCTTAGGCTCCCGGACTTGAGATCGTACGCTGCAGGTCGAC	CTTCCATTAGTAATGCCCATTATTTACTTAAAGTAAAAAAAATAACGGTGTCGGTCTCGTAGATTTAATGCTGACTGCCGCTATCGATGAATTCGAGCTCG	TAGGCTCCCGGACTTGAGAT	tag_13074_st	ATTTAATGCTGACTGCCGCT	tag_13770_st	TGGAAGCTGAAATGCAAAGA	GATCCCCGCGTTATTAGCA	GCTAATAACGCGGGGATCA	AAGGGCAAAGGAAAGATGAGA	423	672	498	1077	904	2408
tI(AAU)N2	14	+	602312	602385	538	522	CGTTGGTTTGATAGTGTGGAGGGAGGGTGAAAAACAGATAACAATGATGTCCACGAGGTCTCTATCCGCGTCTGAGTGTGTCTCGTACGCTGCAGGTCGAC	AGGGTAAGCAAAATAAATCACATTGCGAGAAATGTAAAAAAAGAACGGTGTCGGTCTCGTAGGCCGGACTTCATTAATACCTATCGATGAATTCGAGCTCG	ATCCGCGTCTGAGTGTGTCT	tag_13959_st	GCCGGACTTCATTAATACCT	tag_13604_st	CGCATTGTTGCTATGTCGTT	GGTCTCTAGCGGGATCGAA	TAATAACGCGGGGATCAGCGG	ACAAGGAAAGACGGCCAAC	424	649	367	948	752	2256
tI(AAU)P1	16	+	819529	819602	1206	1821	CATTATGAAAGTTTATCTAAATTAAACAATCTTCAACAATAGAATGATGTCCACGAGGTCTCTGGTTATAGATGCTTCCCACTCGTACGCTGCAGGTCGAC	CTGTTATCAATTTTGCCTAGGAAAAAAACCTGGGTCAAAAATAAACGGTGTCGGTCTCGTAGATCGTAGCAGCGAGTCATCTATCGATGAATTCGAGCTCG	GGTTATAGATGCTTCCCACT	tag_13432_st	ATCGTAGCAGCGAGTCATCT	tag_13868_st	GAAATACAGGTGTGGTGTCCTTC	GATCCCCGCGTTATTAGCA	GCTAATAACGCGGGGATCA	CATGAATCGGACCCTGAGTT	300	549	519	1098	802	2306
tI(AAU)P2	16	-	880296	880369	1606	2870	ACTGACGTATCCCATTTTGAGATACAACATCTTTAACAATATAATGATGTCCACGAGGTCTCTTATACGCCGCGACGGTAGATCGTACGCTGCAGGTCGAC	AATAAGTTGAACTGTCTCTTTCGAGAAAAAGAAAGAGAAAAGAAACGGTGTCGGTCTCGTAGATCGGTAGACATTACGCGCTATCGATGAATTCGAGCTCG	TATACGCCGCGACGGTAGAT	tag_13084_st	ATCGGTAGACATTACGCGCT	tag_13772_st	CATGTGGAAATCGTATGAAACAAC	GATCCCCGCGTTATTAGCA	TTGGCCCAGTTGGTTAAGG	ACCGTGTTGTTTCTGGTGGT	579	828	529	1083	1066	2570
tI(UAU)D	4	+	884361	884493	13287	234	AATTCCAGTATAAATAACAATGTTATTTACGTCTCTTTCGAAAATGATGTCCACGAGGTCTCTCTGAAGACGCATGCATTCCTCGTACGCTGCAGGTCGAC	GTAATACGGGCATGTTGCAAACGCGTGTGAAAAAAAAAGAGAAAGCGGTGTCGGTCTCGTAGGCGATCCGACAATGTTCTATATCGATGAATTCGAGCTCG	CTGAAGACGCATGCATTCCT	tag_13696_st	GCGATCCGACAATGTTCTAT	tag_13305_st	CGGATCTTGATTTGTGTGGA	CGGAAACCGAATGTTGCTAT	CAGTGGTTAGAGCTTCGTGCT	GAGACCAAGGCAAGTTCCAC	582	826	654	1155	1195	2640
tI(UAU)L	12	-	605300	605432	513	1687	ATCTACGGTATAAATAACAATTTAATTTACGTCTCTTTCGAAAATGATGTCCACGAGGTCTCTTATACGCGGGGATGACTGATCGTACGCTGCAGGTCGAC	AGTTGATAGAAATAATGCAACTTTTTTTAAAAAAAAAAGAGAAAGCGGTGTCGGTCTCGTAGATACAAACACCATTCGCGCTATCGATGAATTCGAGCTCG	TATACGCGGGGATGACTGAT	tag_13186_st	ATACAAACACCATTCGCGCT	tag_13773_st	ATTGGCTCCTGCTCCCTTAT	CGGAAACCGAATGTTGCTAT	TGCTCGTGTAGCTCAGTGGT	TAGCGTTTGCATTTTGTGGA	463	707	657	1145	1066	2511
tK(CUU)D1	4	+	1201750	1201822	2567	306	ATATGTATTATCCCTTTTTAACCTTTAAAAGGTCACAAATAAATAGATGTCCACGAGGTCTCTTAAGATCATCCCCTAGCACTCGTACGCTGCAGGTCGAC	AACACAAACCCGAAAAAAAATTTATAACATTTTGAATGTGTTATTCGGTGTCGGTCTCGTAGGAAGTTCATGACACGGATCTATCGATGAATTCGAGCTCG	TAAGATCATCCCCTAGCACT	tag_13439_st	GAAGTTCATGACACGGATCT	tag_13875_st	AACCATCATATACCCGACTAACG	AGTCATACGCGCTACCGATT	AATCGGTAGCGCGTATGACT	TGGTGAAATCGTCGTCAACT	309	574	587	1149	877	2382
tK(CUU)D2	4	-	1352466	1352538	2176	1187	AATGTCCTATTACTTCCAAAATTAATTAGTTTTTCCAACGAAATAGATGTCCACGAGGTCTCTTGACGGACTCACAGACCGATCGTACGCTGCAGGTCGAC	TCACAATGACCACAATAAAGTGTGGATGTTGTTTAAAAAAAAGATCGGTGTCGGTCTCGTAGAGTTTCATCAGCGGATCGCTATCGATGAATTCGAGCTCG	TGACGGACTCACAGACCGAT	tag_13105_st	AGTTTCATCAGCGGATCGCT	tag_13779_st	TTGCGTTTCAGCTTCCACT	AGTCATACGCGCTACCGATT	AATCGGTAGCGCGTATGACT	AAAAACCCGGCTGTAAGGAA	267	532	597	1159	845	2350
tK(CUU)E2	5	-	435752	435824	3257	1979	TTGCTCTCTAATCCCTCCATAAGAATCAGAAAAACAACAATAAGAGATGTCCACGAGGTCTCTTTAGCGACTAGCCGCGTGATCGTACGCTGCAGGTCGAC	AGCCGTAGTTAGATATATCTCAAACGCGCAAAAAGTTAAAAAGAACGGTGTCGGTCTCGTAGCCGATTAGTTAACAGTCGCTATCGATGAATTCGAGCTCG	TTAGCGACTAGCCGCGTGAT	tag_13204_st	CCGATTAGTTAACAGTCGCT	tag_13781_st	AATGGAAGCTGAAACGCAAG	GTCATACGCGCTACCGATT	AATCGGTAGCGCGTATGACT	ATCAGTTCTTGCATTTCAGGTG	374	639	489	1051	844	2349
tK(CUU)F	6	-	226688	226760	223	203	CGGATGTGGTGCATCTTTTAGTGCCGAGTAGCCAGAGATTAAAATGATGTCCACGAGGTCTCTTTCTACTGAGGCGCAGGGATCGTACGCTGCAGGTCGAC	AAATAGAAACACGAATTTTTTTTTTGTTAGAGAAAAAAAGAGATACGGTGTCGGTCTCGTAGTTATTGGGCCACACGTCGCTATCGATGAATTCGAGCTCG	TTCTACTGAGGCGCAGGGAT	tag_13151_st	TTATTGGGCCACACGTCGCT	tag_13782_st	TCTGCGATGTGTCCTGAAAG	AGTCATACGCGCTACCGATT	AATCGGTAGCGCGTATGACT	GCACCCTCATCGTCTCTCTC	412	677	391	953	784	2289
tK(CUU)G1	7	+	122269	122341	1362	353	CGTGAGCTATGTTTCCCTGAAATGGGGACGTTTTCCAACGAATTAGATGTCCACGAGGTCTCTTTTCTGCACGCGAGCTTCCTCGTACGCTGCAGGTCGAC	TCTTAGAAGGGAAATAGCTCTGTTCATATAGAACAAAAAAAGAATCGGTGTCGGTCTCGTAGTCCCTTAGGCCGAGCTGTATATCGATGAATTCGAGCTCG	TTTCTGCACGCGAGCTTCCT	tag_13703_st	TCCCTTAGGCCGAGCTGTAT	tag_13348_st	TGTATGCGACTGCGATTCAT	AGTCATACGCGCTACCGATT	AATCGGTAGCGCGTATGACT	GGGAAGTCAAGGACGAACAA	574	839	593	1155	1148	2653
tK(CUU)G2	7	-	185714	185786	320	273	TTGATACATATAATAATTTTGAAGCCTGAATTTTTCAACGAAATAGATGTCCACGAGGTCTCTTTGCATCCGGGACTGCTGATCGTACGCTGCAGGTCGAC	AATTTAATATATTAGACATTTTTTTGATTTGAGCCTAAAAAAGATCGGTGTCGGTCTCGTAGATTTGTCGCCACAGGTCGCTATCGATGAATTCGAGCTCG	TTGCATCCGGGACTGCTGAT	tag_13192_st	ATTTGTCGCCACAGGTCGCT	tag_13783_st	AAGCAGAACCTCCAAGACCA	AGTCATACGCGCTACCGATT	AATCGGTAGCGCGTATGACT	GCTCCCATCACTCAACCAAT	545	810	386	948	912	2417
tK(CUU)G3	7	+	876394	876466	1285	1726	AATTACATATTAAACCTGAGAGGTCAGATTTCCAATAATAGAATAGATGTCCACGAGGTCTCTGATTCACCTTGAGTAGCACTCGTACGCTGCAGGTCGAC	CATACAAAGGAAATTTATGTCATCGTGTTTTAAAGAAAAAAAGAACGGTGTCGGTCTCGTAGATTCTAGCGACCCCGGATCTATCGATGAATTCGAGCTCG	GATTCACCTTGAGTAGCACT	tag_13440_st	ATTCTAGCGACCCCGGATCT	tag_13876_st	GCTGAAATGCGAGGATTGAT	AGTCATACGCGCTACCGATT	AATCGGTAGCGCGTATGACT	GCAATCCTCCTCTTCATCCA	355	620	631	1193	967	2472
tK(CUU)I	9	-	300228	300300	219	957	AATGTGCTATTACTTCCTAAAATAAGTAGTTTTTCCAACGAAATAGATGTCCACGAGGTCTCTTTTCAGGAGCGACGCTGGATCGTACGCTGCAGGTCGAC	TCTAATGATTTAATTTTTCTATTGAATTGAAAATGGTAAAAAGATCGGTGTCGGTCTCGTAGGGACTGTATAACATGTCGCTATCGATGAATTCGAGCTCG	TTTCAGGAGCGACGCTGGAT	tag_13163_st	GGACTGTATAACATGTCGCT	tag_13784_st	TAATGGGGAACGGGTGATAG	AGTCATACGCGCTACCGATT	AATCGGTAGCGCGTATGACT	CCCATTCCAACAGACAGGAT	577	842	497	1059	1055	2560
tK(CUU)K	11	+	202999	203071	1228	470	TACTGACATATCTCATTTTGAGATACAACACAATCACGTTTAAAAGATGTCCACGAGGTCTCTTTACCTGCGGGACGGAGTATCGTACGCTGCAGGTCGAC	TTGTGTTTGAACGGTGTCGGCTTTAGCATCCTGTTTTAAAAAGAACGGTGTCGGTCTCGTAGTATCTGTAGGACAGGGATCTATCGATGAATTCGAGCTCG	TTACCTGCGGGACGGAGTAT	tag_13315_st	TATCTGTAGGACAGGGATCT	tag_13877_st	TCTTAGGGAAGTAACCAGTTGTCA	AGTCATACGCGCTACCGATT	AATCGGTAGCGCGTATGACT	CGCCCTTCTCCTTTTCTTG	330	595	428	990	739	2244
tK(CUU)M	13	-	480621	480693	431	2321	GCTCAACATATAAGAATACAAGCTGACGGTAAATAACAATAAGTAGATGTCCACGAGGTCTCTTTTGTTGCACCCCGCGAGATCGTACGCTGCAGGTCGAC	GAGAATTATGTATGCAGCATATTTACTTGAATCTTCAAAAAAAGACGGTGTCGGTCTCGTAGCATCGGTTAGGAGGCCGTATATCGATGAATTCGAGCTCG	TTTGTTGCACCCCGCGAGAT	tag_13071_st	CATCGGTTAGGAGGCCGTAT	tag_13323_st	GAATGATGAACTCCGCCTGT	AGTCATACGCGCTACCGATT	AATCGGTAGCGCGTATGACT	CATGACAACAAATGCCCTGA	342	607	389	951	712	2217
tK(CUU)P	16	+	582062	582134	866	600	TATTCGTTAGATAAAGATGTTTCGGTTTTTTATTTCAACAAAAGAGATGTCCACGAGGTCTCTACTAGCGAGGACATGTTGCTCGTACGCTGCAGGTCGAC	CAGCGGTTAAGGGAACCTGATGATAGACCATGCAATAAAAAAGAACGGTGTCGGTCTCGTAGCCATGCCTACAGACGTGTATATCGATGAATTCGAGCTCG	ACTAGCGAGGACATGTTGCT	tag_13843_st	CCATGCCTACAGACGTGTAT	tag_13350_st	TCATCAGCGTCTTCCTTCATT	AGTCATACGCGCTACCGATT	AATCGGTAGCGCGTATGACT	CCGTTATTTCTCGCTGTTGG	499	764	441	1003	921	2426
tK(UUU)D	4	+	359577	359672	2818	1613	AAATAACATGGACAAATTTATGTCCAGGATTCTCCGAAGAACTCAGATGTCCACGAGGTCTCTACGGATGAGCAGTTAGCACTCGTACGCTGCAGGTCGAC	CCTTTTAAAGGTACCGGTTAAAAATTGAGAGAAAAAAAGAAAGAACGGTGTCGGTCTCGTAGTCACGTATAGCATGGGATCTATCGATGAATTCGAGCTCG	ACGGATGAGCAGTTAGCACT	tag_13441_st	TCACGTATAGCATGGGATCT	tag_13878_st	CTACCTGCCAAGGGTCAAAG	TAAAAGCCGAACGCTCTACC	TACCGAAATGTCAGGGGTTC	ACTGTTTATCCGACGCTGGT	605	866	464	1049	1092	2574
tK(UUU)G2	7	-	700953	701048	1167	2588	AGATAGCAAGTACAAGAGAGTACTACAGAAAAAATGAAGAACTCAGATGTCCACGAGGTCTCTCCGCTAGTCTGAGCTTATATCGTACGCTGCAGGTCGAC	CATTCCATTGATGGCTATTGTAGCCAAAAAATTAAAAAAGAAGAACGGTGTCGGTCTCGTAGAGTCAGGTTAAGGCACATCTATCGATGAATTCGAGCTCG	CCGCTAGTCTGAGCTTATAT	tag_13261_st	AGTCAGGTTAAGGCACATCT	tag_13851_st	CAACCCGCTAAGATGGGATA	TAAAAGCCGAACGCTCTACC	TACCGAAATGTCAGGGGTTC	GGTTCGGACACACCTCATTT	570	831	572	1157	1165	2647
tK(UUU)L	12	+	875376	875471	584	1707	GTTTGATGGGTTGTCTATCTTAGACTGGAAAATTCGAAGAACTCAGATGTCCACGAGGTCTCTATTTGCATGTCGCCGAAGCTCGTACGCTGCAGGTCGAC	TAATAGGCGTGAAGCAAAGGAAGTTGATAAAAAAAAAGTAAAGAACGGTGTCGGTCTCGTAGAGTAATAACGCATCGGTGCTATCGATGAATTCGAGCTCG	ATTTGCATGTCGCCGAAGCT	tag_13706_st	AGTAATAACGCATCGGTGCT	tag_13834_st	GGAAGAAACCAAGCAAACCA	TAAAAGCCGAACGCTCTACC	TACCGAAATGTCAGGGGTTC	GCTACCATCGGTGCTCTTTC	395	656	465	1050	883	2365
tK(UUU)O	15	+	438643	438738	2298	1520	CCACTATCTATAGAAATCTTTATTTAGGACGCTCCGAAGAACTCAGATGTCCACGAGGTCTCTGAATCAGATCCTCTCGCACTCGTACGCTGCAGGTCGAC	AAAGAAGAGGATGGTACCCGAATAGTTACTGACAAAAATAAAGAACGGTGTCGGTCTCGTAGCCTAGCGGCTGATGGTGTATATCGATGAATTCGAGCTCG	GAATCAGATCCTCTCGCACT	tag_13443_st	CCTAGCGGCTGATGGTGTAT	tag_13351_st	TATTGGGCTTCTACCGTTGC	TAAAAGCCGAACGCTCTACC	TACCGAAATGTCAGGGGTTC	AGGATTGACGGAGCAACTGA	497	758	603	1188	1123	2605
tK(UUU)P	16	-	769207	769302	1455	2351	ACTGACATATCTCATTTTGAGATACAACACGCTCCGAAGAACTCAGATGTCCACGAGGTCTCTGACGCACCGGCCAGTTATATCGTACGCTGCAGGTCGAC	GTCTTTGTTTCTGCATATTTGTAAAACGTGCAAAAAAGTAAAGAACGGTGTCGGTCTCGTAGTACTGGGCACCATTGTCGCTATCGATGAATTCGAGCTCG	GACGCACCGGCCAGTTATAT	tag_13262_st	TACTGGGCACCATTGTCGCT	tag_13785_st	CCCAACTCATACACCCCAAA	CCCTGACATTTCGGTATCCTT	TACCGAAATGTCAGGGGTTC	TCACTGGAAAGGTCGGTATTG	580	803	410	995	975	2457
tL(CAA)A SUP56	1	+	181141	181254	1321	2516	TGTCCAAATAGTTAAAACATTGTGACCCAAATATCACAAATAAGTGATGTCCACGAGGTCTCTATGGGACTTAGCTCATTCCTCGTACGCTGCAGGTCGAC	ATTCCTACGTAGATTATGAAGTATAGGAGGAAAAAGAAAAAATAACGGTGTCGGTCTCGTAGGGATGTACTCATCCATACCTATCGATGAATTCGAGCTCG	ATGGGACTTAGCTCATTCCT	tag_13697_st	GGATGTACTCATCCATACCT	tag_13605_st	TAACACTTGTCCACCGCAGA	TACCTGAGTATTCCCACAGTTCAC	AGTGAACTGTGGGAATACTCAGG	TGAAGCAGACCAAAGCAACA	638	858	580	1141	1194	2658
tL(CAA)C SUP53	3	+	90859	90972	7239	352	GTTATATTTATAGGATAATTATACTCTATTTCTCAACAAGTAATTGATGTCCACGAGGTCTCTAAGGCGCTCTGTCATTGTCTCGTACGCTGCAGGTCGAC	CGATAGCGCCCCTGTGTGTTCTCGTTATGTTGAGGAAAAAAATAACGGTGTCGGTCTCGTAGTTATCTTCCCCAGCGGTGCTATCGATGAATTCGAGCTCG	AAGGCGCTCTGTCATTGTCT	tag_13960_st	TTATCTTCCCCAGCGGTGCT	tag_13833_st	GCTGAAACGCAAGGATTGAT	TTACGATACCTGAGTATTCCCACA	CTGTGGGAATACTCAGGTATCGT	CACCCACAGCACCTAACAAA	386	600	640	1207	1002	2466
tL(CAA)G1	7	+	205521	205634	2800	1399	ACTGATTCCAACCTATATTAGTAGAACCGAAACATACAAATAAGTGATGTCCACGAGGTCTCTCTGAGCTGTCCAGATTGTCTCGTACGCTGCAGGTCGAC	CAAACGCGGGTAGCTTGATCACAGAACCAAAAAGATAAAAAATAACGGTGTCGGTCTCGTAGGGTAGGACTTGACTTCATCTATCGATGAATTCGAGCTCG	CTGAGCTGTCCAGATTGTCT	tag_13961_st	GGTAGGACTTGACTTCATCT	tag_13869_st	TGTGGGTGTTTTATACCTCTCTCAT	TTACGATACCTGAGTATTCCCACA	CTGTGGGAATACTCAGGTATCGT	TTCCATTGTTTTTCCGCTTC	355	569	646	1213	977	2441
tL(CAA)G2 SUP54	7	+	423092	423205	2537	756	TAATAACTAATAGTTGCTATAGTCACACCTTTTCAACAGATAAGTGATGTCCACGAGGTCTCTATGCTCTCAGCTAGGCCACTCGTACGCTGCAGGTCGAC	TGACGCCTGGTCGGTAAAAAGATCATTTTAAATGGAAAAAAATAACGGTGTCGGTCTCGTAGCTACGAGGCCCCATTGGTATATCGATGAATTCGAGCTCG	ATGCTCTCAGCTAGGCCACT	tag_13433_st	CTACGAGGCCCCATTGGTAT	tag_13341_st	CCCAAAAACGCTCTAGTCCA	TTACGATACCTGAGTATTCCCACA	CTGTGGGAATACTCAGGTATCGT	CAGAAGGAACCGAAAGGGTTA	619	833	389	956	984	2448
tL(CAA)G3	7	-	857378	857491	1077	796	ATGAGGTAACATTACTTGTACCGCGCTCGCTTTCAACAAATAAGTGATGTCCACGAGGTCTCTTCATGGAGCTCATATGCGATCGTACGCTGCAGGTCGAC	CCCATTAGCAGGAAATTGGTACTTAATTATTGAAAAAAAAATTATCGGTGTCGGTCTCGTAGAAATAGCCAGAGCCACATCTATCGATGAATTCGAGCTCG	TCATGGAGCTCATATGCGAT	tag_13120_st	AAATAGCCAGAGCCACATCT	tag_13850_st	CAGGCTCCAAGAAAAGTGGT	TTACGATACCTGAGTATTCCCACA	CTGTGGGAATACTCAGGTATCGT	AACTTGCACTGTCCGGTTTC	376	590	633	1200	985	2449
tL(CAA)K	11	+	458557	458670	1503	2569	ACATGACTGGGTATACTTGAATTCTAAAATTTTCAACAAATAAGTGATGTCCACGAGGTCTCTTGAGTAGGATCCCCTCCACTCGTACGCTGCAGGTCGAC	TCATTATTGTTCATTGTTGAACACAATATAAAAAAATATAAAATACGGTGTCGGTCTCGTAGCCCGAGTTCTAAGCATGTATATCGATGAATTCGAGCTCG	TGAGTAGGATCCCCTCCACT	tag_13434_st	CCCGAGTTCTAAGCATGTAT	tag_13342_st	CAATCCTTGCACTTCAGCTTC	TTACGATACCTGAGTATTCCCACAG	CTGTGGGAATACTCAGGTATCGT	CAATGCTGGATGTGGATGAC	305	519	393	960	674	2138
tL(CAA)L	12	+	628383	628497	1265	187	ATTCATTAAAAGGTTCTTTTCGTATAACTTTTACAACAAATAAGTGATGTCCACGAGGTCTCTGGGTGCATCTTCCGATTCCTCGTACGCTGCAGGTCGAC	AGAGTGCTAATATGTAGCTTCAAAATTTTCGGAAGGCAAAAATAACGGTGTCGGTCTCGTAGGACGAGGGTGGATTTCATCTATCGATGAATTCGAGCTCG	GGGTGCATCTTCCGATTCCT	tag_13698_st	GACGAGGGTGGATTTCATCT	tag_13870_st	TGGCAGGTAATCAGCAAACA	GACCGCTCGGCCAAACAAC	GCGCCTGATTCAAGAAAATATC	GAGCGCAAAAGAAAGGAGAA	455	733	441	972	901	2364
tL(CAA)M	13	+	504895	505008	2751	325	TAACAACTTATAGTTGCTATAGTCACACCTTTTCAACAGATAAGTGATGTCCACGAGGTCTCTGTCAGGCTCAAAGCTTGTCTCGTACGCTGCAGGTCGAC	CAACATAAAGGGGCGCCCTCAAAGGAATACGCGAGAAAAAAATAACGGTGTCGGTCTCGTAGGACCCTAGCGAACTATGTATATCGATGAATTCGAGCTCG	GTCAGGCTCAAAGCTTGTCT	tag_13962_st	GACCCTAGCGAACTATGTAT	tag_13343_st	GAAGCTGAAATGCAAAGATTGA	TTACGATACCTGAGTATTCCCACA	CTGTGGGAATACTCAGGTATCGT	TTCACAGCCCCAATAAAGGA	517	731	530	1097	1023	2487
tL(CAA)N	14	+	443006	443119	648	1196	ATCGTTGTCTAGCGATAAATAATGCTTTTTCTTCAACAAATAAGTGATGTCCACGAGGTCTCTGGAGTTTCTCCCAGTCCACTCGTACGCTGCAGGTCGAC	TTTCCCAAGTTCTCGCTGCAATCAGATAAAAAGGAAAAAAAATAACGGTGTCGGTCTCGTAGCGTGGTACGAATTACGATCTATCGATGAATTCGAGCTCG	GGAGTTTCTCCCAGTCCACT	tag_13435_st	CGTGGTACGAATTACGATCT	tag_13871_st	ACTTTTCTCCTTCCGGGTTC	ACGATACCTGAGTATTCCCACAG	CTGTGGGAATACTCAGGTATCGT	TGTTCACGACAAGGTTTTGG	671	887	546	1113	1195	2659
tL(GAG)G	7	+	700675	700756	889	2880	TTTATAAATTGCGTTTGCTTTATTCCCTTACCCAACAGATGAATTGATGTCCACGAGGTCTCTGTTGGACCTCGGATATTCCTCGTACGCTGCAGGTCGAC	CTAACAGCCTAATTCTTATTGAAGTGCGTAGATTCAAAAAAATATCGGTGTCGGTCTCGTAGCCAGCATCCCCAGTATGTATATCGATGAATTCGAGCTCG	GTTGGACCTCGGATATTCCT	tag_13699_st	CCAGCATCCCCAGTATGTAT	tag_13344_st	TGAGGTGCGTTCTTTCTGAC	CCTGACGCCTTAGACCACTC	CGAGTGGTCTAAGGCGTCA	GCGATTATTTCTCCTTCCGTTT	464	730	519	1070	963	2459
tL(UAA)B1	2	+	9583	9666	1850	885	AAATAGGGTATTTAACTGGTTACCGGAAAGGTTTAGAAAATTCGTGATGTCCACGAGGTCTCTTAGAAAGAGACCGGTCCACTCGTACGCTGCAGGTCGAC	CCTATTATTCTAGTTAATAGTACGTTAAATCATCAAAAAAAATACCGGTGTCGGTCTCGTAGCTTAGGAGTAGGCCCGATCTATCGATGAATTCGAGCTCG	TAGAAAGAGACCGGTCCACT	tag_13436_st	CTTAGGAGTAGGCCCGATCT	tag_13872_st	GCTGAAACGCAAGGATTGAT	TAGACCACTCGGCCAACC	AGTGGTCTAAGGCGGCAGA	GCAATTCTGCAAGGACAACA	393	669	389	940	774	2268
tL(UAA)D	4	+	519743	519826	7634	866	CTAAACGAATAAGAACAGAATCTGAAAACAGGCAAGTGATTTTACGATGTCCACGAGGTCTCTAGATAGTTCTACCCAGCACTCGTACGCTGCAGGTCGAC	AAAAAAAATGTCTAATATCGAAGATTGAGGAAAAAAATAAGTTATCGGTGTCGGTCTCGTAGGGTACTACTCAAGCCGATCTATCGATGAATTCGAGCTCG	AGATAGTTCTACCCAGCACT	tag_13437_st	GGTACTACTCAAGCCGATCT	tag_13873_st	TCCATAAAAGGGAATCTGCAA	GTCTGCCGCCTTAGACCAC	AGTGGTCTAAGGCGGCAGA	AACGAAATGAGGAATAATCGTAACA	354	619	582	1133	917	2411
tL(UAA)J SUP51	10	-	424432	424515	323	642	GTATGACTTATATAACATCTATTTCCTAGGATTTTTAAATAAGATGATGTCCACGAGGTCTCTTATGGCCCTAGGAGTCCGATCGTACGCTGCAGGTCGAC	TCATGAGTGCTTTCGGTGCAGCAAAAAGATAAGGACAAAAAATACCGGTGTCGGTCTCGTAGCATCATTGGTCCATGGCGCTATCGATGAATTCGAGCTCG	TATGGCCCTAGGAGTCCGAT	tag_13116_st	CATCATTGGTCCATGGCGCT	tag_13774_st	CCCTGCTTTCCTTCCAAAA	TAGACCACTCGGCCAACC	GTGGTCTAAGGCGGCAGA	GGCTCTTTGAATTTGCCTTTT	455	731	463	1015	911	2405
tL(UAA)K	11	+	84208	84291	1261	413	CGTGTTGACAACACTTCGGGAGTTTCCAGTAAGTAAAATTTGTATGATGTCCACGAGGTCTCTCGGATCGGATCTCACTTCCTCGTACGCTGCAGGTCGAC	GGATCAACGCTTGCAACACAAAAATAAATTAAAAAAAAAAATTACCGGTGTCGGTCTCGTAGTTCGACCCGGTCGACTGTATATCGATGAATTCGAGCTCG	CGGATCGGATCTCACTTCCT	tag_13701_st	TTCGACCCGGTCGACTGTAT	tag_13346_st	CGCCCAGTTAGAGTGCTGAT	TAGACCACTCGGCCAACC	GTGGTCTAAGGCGGCAGA	ATAATCGGAAGGGGTCTTGG	583	859	559	1111	1135	2629
tL(UAA)L	12	-	962972	963055	4544	730	GGATGGTGTTCGTATCCTGTATTTCCTTGTTGTTGTATTATCGACGATGTCCACGAGGTCTCTTCCACGCTAGACTACGATATCGTACGCTGCAGGTCGAC	ATATTTTAAAAATTTTGTGGCGCCGTCAAAATAAAAAAAAAATACCGGTGTCGGTCTCGTAGGTACTGAATGCATATGCGCTATCGATGAATTCGAGCTCG	TCCACGCTAGACTACGATAT	tag_13243_st	GTACTGAATGCATATGCGCT	tag_13775_st	GCTGATGCCGAAAGACAACT	CTGCCGCCTTAGACCACTC	AGTGGTCTAAGGCGGCAGA	ATTATTCGGAGGGGCAATCT	583	850	559	1110	1125	2619
tL(UAA)N	14	-	726134	726217	1828	3969	ACTGACGTATCTCATTTTGAGATACAACAAAAAGTATAAATCTTTGATGTCCACGAGGTCTCTTCGAGGACGAACCCTACGATCGTACGCTGCAGGTCGAC	TTGCCATTAAAGATCTGGTGGCCCCGACAAAATAAAAAAAAATACCGGTGTCGGTCTCGTAGATTAGGGCTTGCACTGCGCTATCGATGAATTCGAGCTCG	TCGAGGACGAACCCTACGAT	tag_13100_st	ATTAGGGCTTGCACTGCGCT	tag_13776_st	TCCCAACAATTATCTCAAAACTCA	GTCTGCCGCCTTAGACCAC	AGTGGTCTAAGGCGGCAGA	AAGATGGGCGTAGCATTGAC	463	728	515	1066	959	2453
tL(UAG)J	10	-	617919	618019	585	215	AATCAATGATATGCGATTGTTTATGAAGTCCATTCAACAAACAATGATGTCCACGAGGTCTCTATATTCCACGCGCGAGCACTCGTACGCTGCAGGTCGAC	ATTCTTGGAAAGATGGGAAGTGAAAAAAAAAAATACAAAAAATAACGGTGTCGGTCTCGTAGGAGAGACGCCAAGTCGATCTATCGATGAATTCGAGCTCG	ATATTCCACGCGCGAGCACT	tag_13438_st	GAGAGACGCCAAGTCGATCT	tag_13874_st	ATTGCCCCACAAATCTTCC	TAAACCACTCGGCCAAACTC	GGCGTCAGATTTAGGTGGAT	AACCACACCGTCTTGAATCC	269	545	407	951	678	2155
tL(UAG)L1	12	-	592519	592619	476	9844	GGCTAACCCAATGGCTTGTATAATCCATCGTTTTCAACATACAATGATGTCCACGAGGTCTCTTCGCGCTTCGGACTGTATATCGTACGCTGCAGGTCGAC	AGTAATTTATAGGAAAAAGTAAAGATGGCAAAAAACAAAAAATAACGGTGTCGGTCTCGTAGTTTCTATCGGCACGTGCGCTATCGATGAATTCGAGCTCG	TCGCGCTTCGGACTGTATAT	tag_13260_st	TTTCTATCGGCACGTGCGCT	tag_13777_st	AAGGAAGCTGAAATGGAAGGA	TAAACCACTCGGCCAAACTC	GCGTCAGATTTAGGTGGGTTT	GCAAACCTTTACGCCCAAT	324	600	422	967	749	2226
tL(UAG)L2	12	+	732090	732190	1265	352	TAATGCTATAATAGACATTTAAATCCAATTCTTCCAACATACAATGATGTCCACGAGGTCTCTGGCCTGATTAAAGACTTCCTCGTACGCTGCAGGTCGAC	GCCATTTTGCGATCATGTGACCTCAAGAGAAAAAGCAAAAAATAACGGTGTCGGTCTCGTAGCGGTCACTACACTACTGTATATCGATGAATTCGAGCTCG	GGCCTGATTAAAGACTTCCT	tag_13702_st	CGGTCACTACACTACTGTAT	tag_13347_st	TGTAACCAGCAATGGGTTGA	TAAACCACTCGGCCAAACTC	AGGCGTCAGATTTAGGTGGA	GAAGTGGTGGCGTAAATTGG	600	876	530	1073	1131	2608
tM(CAU)C	3	+	149920	149991	1017	2846	AACTATTCATATATCTACGTGAAAGCATCAGAGATTGTAATGTTGGATGTCCACGAGGTCTCTATTTACCGGGTTCGGAAGCTCGTACGCTGCAGGTCGAC	CGACGTCAGTTCCATTATTATTAATGGACAGTTCAAAAAATTTAACGGTGTCGGTCTCGTAGCGGACTCTTAACCATGATCTATCGATGAATTCGAGCTCG	ATTTACCGGGTTCGGAAGCT	tag_13707_st	CGGACTCTTAACCATGATCT	tag_13879_st	TGCGGTGTAAAAAGATGACG	TTTCGATCCGAGGACATCA	GGCTCATAACCCTGATGTCC	ATCATTGCGCTTCAGCTTTT	432	671	405	983	807	2313
tN(GUU)C	3	+	127716	127789	986	681	ATATATTAGTAATACTTTTTCTGTAAAAGTGACACAAGATAAAATGATGTCCACGAGGTCTCTGCACGAGTTTGAGGCACACTCGTACGCTGCAGGTCGAC	TTTTCTCCGTCGGAGATAAAAAAAAAAAAAGAAAAGAAAAATTAACGGTGTCGGTCTCGTAGTGACGTTCTGGATGACTGCTATCGATGAATTCGAGCTCG	GCACGAGTTTGAGGCACACT	tag_13417_st	TGACGTTCTGGATGACTGCT	tag_13821_st	TGTTTGTTCTGCTTCCATCG	GATTAACAGTCGCACGCCTTA	AAGGCGTGCGACTGTTAATC	ACCGACAGGAAATCGTCAAA	432	689	420	989	833	2337
tN(GUU)F	6	-	137486	137559	329	9375	ACGTAGTCTATTCCGTTTTAAGAGTTGCAGAACTCAAAAGTGACTGATGTCCACGAGGTCTCTATCCCTGCATACGACTAGATCGTACGCTGCAGGTCGAC	ATACAATAAAATCTAAATCTTAGAAACTGATTTTGAATAAAAAAACGGTGTCGGTCTCGTAGTTTAGACGGCCCTCCAGACTATCGATGAATTCGAGCTCG	ATCCCTGCATACGACTAGAT	tag_13080_st	TTTAGACGGCCCTCCAGACT	tag_13473_st	TCTCATCATTTGCGTCATCTTC	GATTAACAGTCGCACGCCTTA	AAGGCGTGCGACTGTTAATC	GAGGCCATTGATCCAGTCAT	488	745	625	1194	1094	2598
tN(GUU)G	7	+	731137	731210	316	1717	TGAGGACTAAGAGAGCCTATATTTTCTCGAGAACATAGTCAAAAAGATGTCCACGAGGTCTCTTTATGGTGTAGCGCGCTCCTCGTACGCTGCAGGTCGAC	GATTTCACAAATCTTCCTCCAATGTTGCTCATTTCAAGCAAAAAACGGTGTCGGTCTCGTAGGGCGCGTACTATACATCTATATCGATGAATTCGAGCTCG	TTATGGTGTAGCGCGCTCCT	tag_13681_st	GGCGCGTACTATACATCTAT	tag_13294_st	CTGTTGACCATTCCCTTTTCA	GATTAACAGTCGCACGCCTTA	AAGGCGTGCGACTGTTAATC	CGGGTATGGACGAAGATCAA	327	584	535	1104	843	2347
tN(GUU)K	11	+	74624	74697	759	837	GCATTATTTATATATCTTGTTTTCAAAAGAAAAATATAGCAATTAGATGTCCACGAGGTCTCTATGATTTCGCGCGACGGTCTCGTACGCTGCAGGTCGAC	ATTAGAATTGATTTGTTTCTTCAGTGTAAAAAAGTTAAAAATAAGCGGTGTCGGTCTCGTAGATTTGCGAGGGTCACCTGCTATCGATGAATTCGAGCTCG	ATGATTTCGCGCGACGGTCT	tag_13945_st	ATTTGCGAGGGTCACCTGCT	tag_13822_st	ATGGTTGCACAAAGACCACA	GATTAACAGTCGCACGCCTTA	AAGGCGTGCGACTGTTAATC	GAGTGGGCAGATGTGACTGA	508	765	565	1134	1054	2558
tN(GUU)L	12	-	975983	976056	2588	6838	AATAATATTATATAATTTTTAACTCAGCAGATATCGGAAATAAAAGATGTCCACGAGGTCTCTATCCTGCGAGGGTAGTAGATCGTACGCTGCAGGTCGAC	ATGGAGTTTTTAGCTCACTAAATAATTTAATGCAAAAAAAATAAACGGTGTCGGTCTCGTAGATTAGCCGGTCCCATGAGCTATCGATGAATTCGAGCTCG	ATCCTGCGAGGGTAGTAGAT	tag_13082_st	ATTAGCCGGTCCCATGAGCT	tag_13737_st	AGTGGAAGCTGAAACGCAAG	GATTAACAGTCGCACGCCTTA	TTAAGGCGTGCGACTGTTAAT	ATCCGAAACGGGAAGAAAAA	462	719	626	1193	1067	2571
tN(GUU)N1	14	+	102716	102789	7493	1313	TACTGACGTACCTCATTTTGAGATACAACAAATCATATATTATAAGATGTCCACGAGGTCTCTTAGAGAGCCGACTGCACACTCGTACGCTGCAGGTCGAC	TGAAATGGTTATTTAGTAAATAAGCACAAATACAAAAAAAATAAACGGTGTCGGTCTCGTAGGGAGAGCCTTACCCATCTATATCGATGAATTCGAGCTCG	TAGAGAGCCGACTGCACACT	tag_13418_st	GGAGAGCCTTACCCATCTAT	tag_13295_st	CCTTGCACTTCAGCTTCCTC	GATTAACAGTCGCACGCCTTA	AAGGCGTGCGACTGTTAATC	ATTGGGTGCCAGTTGTGTCT	365	622	455	1024	801	2305
tN(GUU)N2	14	+	632599	632672	1538	1184	TAGATCATGGAAATCGAACCTTTCACGTTCTGCAGAATTTAAAGTGATGTCCACGAGGTCTCTGATCTGGTTAGAGCTCTCCTCGTACGCTGCAGGTCGAC	TTGACTGTTTGCTACCGACAAGACTATCTGAAATAAGAAAAAAAACGGTGTCGGTCTCGTAGAGGGTACTTTGCAGCCTGCTATCGATGAATTCGAGCTCG	GATCTGGTTAGAGCTCTCCT	tag_13682_st	AGGGTACTTTGCAGCCTGCT	tag_13823_st	AAACACACGCTGATTGGTCA	GATTAACAGTCGCACGCCTTA	AAGGCGTGCGACTGTTAATC	TACGCAGGTATTGCCACAAG	439	696	471	1040	891	2395
tN(GUU)O1	15	+	228331	228404	2256	210	GTGCATCATTAAGTTTCTAAAATTTAGATCTTTCATAAAATATTAGATGTCCACGAGGTCTCTTAGGTCATCCACAGCGGTCTCGTACGCTGCAGGTCGAC	TGTGTGAAATGGCCCGAAAAAAAAGTATTGGGTATTCAAAAATAACGGTGTCGGTCTCGTAGGTGGTACTCAACCGATCTATATCGATGAATTCGAGCTCG	TAGGTCATCCACAGCGGTCT	tag_13946_st	GTGGTACTCAACCGATCTAT	tag_13296_st	TGTCATTCCATTGTTGGTGAA	CGCACGCCTTAACCAACT	AAGGCGTGCGACTGTTAATC	ACCACAAGGTGTCATCATCG	479	746	399	968	869	2373
tP(AGG)C SUF2	3	-	123577	123648	1249	3082	GTATCCCAGACTTCAGGCGCTGTTCTGCCGGGATTTTTCAAAGGAGATGTCCACGAGGTCTCTAAGCGACTCGAACTGACTATCGTACGCTGCAGGTCGAC	TACCATTTCTGCCAGTAGCGACACCACACATTGTAAAAACAATGTCGGTGTCGGTCTCGTAGATTCTTTGCCCACGGAGGCTATCGATGAATTCGAGCTCG	AAGCGACTCGAACTGACTAT	tag_13271_st	ATTCTTTGCCCACGGAGGCT	tag_13794_st	TTCGTGTCTGTTTCGCAGTC	GCACCCTAAGCGAGAATCAT	GCTTAGGGTGCGGGAGGTC	TGATTTTCAGCCTTCGCTCT	305	564	469	1047	764	2270
tP(AGG)N SUF10	14	-	631846	631917	785	1939	ATGTTGAGGTACCATATTTTGAAATTCATTAAAACAACTTCTACCGATGTCCACGAGGTCTCTCTCGTAGGACCGATGACTATCGTACGCTGCAGGTCGAC	CTAAAGATATGCAATATTAAAAAATTTGATAAAAATAAATCAATGCGGTGTCGGTCTCGTAGATTCACTGCGACCAGAGGCTATCGATGAATTCGAGCTCG	CTCGTAGGACCGATGACTAT	tag_13270_st	ATTCACTGCGACCAGAGGCT	tag_13793_st	ATGACCAATCAGCGTGTGTT	CACCCTAAGCGAGAATCATACC	CTTAGGGTGCGGGAGGTC	TAGCGGGGGTCATACTTTTC	340	600	512	1091	844	2350
tP(UGG)A TRN1	1	+	139152	139254	807	2177	TGTATATATATACATCTATCCGAAAAGGAAGACATCAATTAGTACGATGTCCACGAGGTCTCTTTTGATGAGCGTCCGGCACTCGTACGCTGCAGGTCGAC	AGTACTGCTACTTTAATTTTATAGATAGGCAAAAAAAAATTATTCCGGTGTCGGTCTCGTAGCGATGCTTAGACAGTGATCTATCGATGAATTCGAGCTCG	TTTGATGAGCGTCCGGCACT	tag_13446_st	CGATGCTTAGACAGTGATCT	tag_13882_st	TGGCGGATCTGAAAAATAGG	TAATCAGGAAGTCGCCCAAA	TTTGGGCGACTTCCTGATTA	AGGACACCGTCACCAAGAAG	478	726	565	1114	1024	2499
tP(UGG)F SUF9	6	+	101376	101478	1777	1649	CCTATATAAATATTTCTGTTTTTCTTATTAACGCAACAATAATTCGATGTCCACGAGGTCTCTCCTAGACTATTATCGAGCAGCGTACGCTGCAGGTCGAC	CTAGTCGATCAGATAAGATATTATGACCAGATATGCAAAAAAAAGCGGTGTCGGTCTCGTAGAAACCCAAGGAAGCTGATCTATCGATGAATTCGAGCTCG	CCTAGACTATTATCGAGCAG	tag_1356_st	AAACCCAAGGAAGCTGATCT	tag_13881_st	ATCATTGCCCTGCTAGTGCT	CCCAAAGCGAGAATCATACC	TGGGCGACTTCCTGAATAAA	AGAGCCAAGACCAACCAAGA	490	752	465	1016	952	2427
tP(UGG)L	12	+	92548	92650	3925	2097	CCAGTACTAGATTGTTCATAATGGATCAAGTTCACAAGTTAATAAGATGTCCACGAGGTCTCTATAGCAGCGTACCATAAGCTCGTACGCTGCAGGTCGAC	TGGACAGCCTAAGCTAGTGCTTTGGGTCCAAAAAAAGAAAATAAACGGTGTCGGTCTCGTAGTAGGACCGGGGACTTTGTATATCGATGAATTCGAGCTCG	ATAGCAGCGTACCATAAGCT	tag_13710_st	TAGGACCGGGGACTTTGTAT	tag_13355_st	CCTCTAACCTCGATGACAGCTT	CCCAAAGCGAGAATCATACC	TGGGCGACTTCCTGACTAAA	AGGGTCTTTTGGCCTATGCT	318	580	438	989	753	2228
tP(UGG)M SUF7	13	-	196068	196170	313	7933	TACTATTCGGTGATTCCTTAGTGGCTAAGATTCACAAGTTCACAAGATGTCCACGAGGTCTCTATGGGACCCGACACTACTATCGTACGCTGCAGGTCGAC	ATGAATGGTCGTTTTTGTAATACTCCAAAAAAAATATCAAAAAAACGGTGTCGGTCTCGTAGGACGTTAGTCGATGCCGTATATCGATGAATTCGAGCTCG	ATGGGACCCGACACTACTAT	tag_13272_st	GACGTTAGTCGATGCCGTAT	tag_13324_st	CGGATCTTGATTTGTGTGGA	TAATCAGGAAGTCGCCCAAA	TTTGGGCGACTTCCTGATTA	CGCCTTCATTTCGCTGTTAT	602	850	393	942	976	2451
tP(UGG)N2	14	+	568115	568217	8301	1474	TTTGATAACAATTTCCTGTGAGACAGAAATCACCATAAAATAATCGATGTCCACGAGGTCTCTAAACCGAGTGCTGATAAGCTCGTACGCTGCAGGTCGAC	AAAAGGAATAAGTGAAACACCACGTTGATGGTGAAAAAATATAAACGGTGTCGGTCTCGTAGCCGCCGTTGTAAGCAATTATATCGATGAATTCGAGCTCG	AAACCGAGTGCTGATAAGCT	tag_13711_st	CCGCCGTTGTAAGCAATTAT	tag_13356_st	CCGGTAAATTGGAAGCTGAA	GCCCAAAGCGAGAATCATAC	TGGGTTCAATTCCCAGCTC	TGGTGAAGATGGTTGCGTTA	574	835	565	1163	1182	2657
tP(UGG)O2 SUF11	15	+	464450	46451	3174	418018	CAGTGTGATACTCAAGACTAAGTAGTCTTAACAACAAGTTAACAAGATGTCCACGAGGTCTCTCCTATGAGTGAGATGAAGCTCGTACGCTGCAGGTCGAC	AAATCTGTTACCCGACCAATAGGAAATAAATAATCAAAAATAAAACGGTGTCGGTCTCGTAGTACTGGCTACCAGGTTGTATATCGATGAATTCGAGCTCG	CCTATGAGTGAGATGAAGCT	tag_13709_st	TACTGGCTACCAGGTTGTAT	tag_13354_st	GCAAGAAGACCCAGCATGA	CCAAAGCGAGAATCATACCAC	GGGCGACTTCCTGACTAACA	TGTTTTCCACTTTTTGCGATT	632	895	414	967	1045	2521
tP(UGG)O3	15	+	980683	980787	2614	1041	AATTATAATACTTCATCTTGAACTTTGAGAAATCACAAATTGTATGATGTCCACGAGGTCTCTGTACGACTATAGCCTAAGCTCGTACGCTGCAGGTCGAC	AAGAAACAAAATTAAGTAACTGTCTAAAACGAAGTTGCAAAAAAACGGTGTCGGTCTCGTAGCAAGGGCATCATCCCATTATATCGATGAATTCGAGCTCG	GTACGACTATAGCCTAAGCT	tag_13712_st	CAAGGGCATCATCCCATTAT	tag_13357_st	CCTTGCACTTCAGCTTCCTC	ATGCTTTGTTCCTCCTGTTTG	CAAACAGGAGGAACAAAGCAT	TGGATGTCTGCATTAAGGTGA	293	521	601	1167	874	2347
tQ(CUG)M CDC65	13	-	808246	808317	698	2460	CCATAAAACCGGAAGTTTTAGTGTACACTAACAACAGAAGAAAAAGATGTCCACGAGGTCTCTCCACGTCTCGGAGTTAGGATCGTACGCTGCAGGTCGAC	AAAAAATGATGGTTTAAATTTCGTAAAATACGAAAAATGAAGGGACGGTGTCGGTCTCGTAGTCCCGTAGGGAGGATAATCTATCGATGAATTCGAGCTCG	CCACGTCTCGGAGTTAGGAT	tag_13142_st	TCCCGTAGGGAGGATAATCT	tag_13847_st	AATATGACCAATCGGCGTGT	GATCAGAACCGAAAGTGATAACC	ATCCGAACAACCCCAGTTC	ACGTGAGAAAGTGCCATACCA	361	620	457	1043	816	2322
tQ(UUG)B	2	+	350827	350898	2948	2395	AAACCACTCAATTTAAAAAATTGTCAGAAATACCATCAATAAAAGGATGTCCACGAGGTCTCTTACGCTGAGTTCGGAGTCCTCGTACGCTGCAGGTCGAC	CATTCTAAGAGTGTCCGATAATTCATGAAAAAATATATAAAAATACGGTGTCGGTCTCGTAGGATTAGGGACAATACGTGCTATCGATGAATTCGAGCTCG	TACGCTGAGTTCGGAGTCCT	tag_13686_st	GATTAGGGACAATACGTGCT	tag_13829_st	GGTGTGAGAAGAGCCGTTGT	CCGGATCAAAACCGAAAGT	TGGTTATCACTTTCGGTTTTGA	ATAGGTTGCGGTTGTGGTTG	527	783	471	1036	972	2478
tQ(UUG)C	3	-	168301	168372	302	4052	ACTGACATACCTCATTTTGAGATACAAAATATTACAAGAAGTCCTGATGTCCACGAGGTCTCTCCAGGGAGTACATTTCAGATCGTACGCTGCAGGTCGAC	CTGAAGATAGTGAAAAATCAAAAAAATAAATCTGTATTCAAAAAACGGTGTCGGTCTCGTAGATACTCGGTCGAGTCTAGCTATCGATGAATTCGAGCTCG	CCAGGGAGTACATTTCAGAT	tag_13066_st	ATACTCGGTCGAGTCTAGCT	tag_13745_st	AGCTGAAACGCAAGGATTGA	CCGGATCAAAACCGAAAGT	TGGTTATCACTTTCGGTTTTGA	TGCCGACATTTCTAGCTCCT	485	741	442	1007	901	2407
tQ(UUG)D1	4	+	520972	521043	280	271	TTTGTTCAAGAAGGTACGAAAGAAGGTTCCAATCGTCCATTTTAGGATGTCCACGAGGTCTCTTTGATCTGCCACACGGGTCTCGTACGCTGCAGGTCGAC	AAAGCCAAGAAAGAAAAATAAAACAAGAGGGTTAAAAAATAGAAACGGTGTCGGTCTCGTAGCCGCTCTTGAGATATCGTATATCGATGAATTCGAGCTCG	TTGATCTGCCACACGGGTCT	tag_13950_st	CCGCTCTTGAGATATCGTAT	tag_13328_st	GGAAACTGAAACGCAAGGAT	CCGGATCAAAACCGAAAGT	TGGTTATCACTTTCGGTTTTGA	TCTACAGCAACCACCGGATT	422	678	422	987	818	2324
tQ(UUG)D3	4	-	802731	802802	509	3819	GTAACTTATAAAAGCCTAAAAAAGGAGGATTTAACATGAATTGTCGATGTCCACGAGGTCTCTCCTACGGTACAAGAGTCGATCGTACGCTGCAGGTCGAC	CAACAAAAAATATCAATGTTGATTTGTTAGAGTAAAAATAAAAAGCGGTGTCGGTCTCGTAGAATTGGAACGACAGGTAGCTATCGATGAATTCGAGCTCG	CCTACGGTACAAGAGTCGAT	tag_13127_st	AATTGGAACGACAGGTAGCT	tag_13747_st	GGTGTTGTTGGCTGTTGAGA	CCGGATCAAAACCGAAAGT	TGGTTATCACTTTCGGTTTTGAT	TATTTCGCCATCCCCTTTTT	606	862	615	1180	1195	2701
tQ(UUG)E1	5	+	250286	250357	2129	361	TACTGACGTATCTCATTTTGAGATACAACAATTTACAGTTGTACTGATGTCCACGAGGTCTCTTAAGTCACGCAGGCTACACTCGTACGCTGCAGGTCGAC	TTTAACCAATATATTCAGCATATATTATGTAAAAATGAATAAAAACGGTGTCGGTCTCGTAGGGTACGAGGAATTGCCATCTATCGATGAATTCGAGCTCG	TAAGTCACGCAGGCTACACT	tag_13423_st	GGTACGAGGAATTGCCATCT	tag_13856_st	TAGCCTCTCCCAACAATGGA	CCGGATCAAAACCGAAAGT	TGGTTATCACTTTCGGTTTTGA	ACACCTGCCTTCTTGTTGGA	630	886	453	1018	1057	2563
tQ(UUG)E2	5	-	131082	131153	2257	619	AGTGTTGATATATGATAAAATTATTGTGGAAATCAATAATTAAGAGATGTCCACGAGGTCTCTCCTAGTCGAGCAGATCCGATCGTACGCTGCAGGTCGAC	GGAGATCTATTAAAAATACAAGTTAGCTGAGCGGGGGAAAAAAATCGGTGTCGGTCTCGTAGCTTATCCGTACAGGGTAGCTATCGATGAATTCGAGCTCG	CCTAGTCGAGCAGATCCGAT	tag_13113_st	CTTATCCGTACAGGGTAGCT	tag_13748_st	CACGAGCATTGAAACAAGGA	CGGATCAAAACCGAAAGTG	TGGTTATCACTTTCGGTTTTGA	ATTTTCTTCAAAAGCGGGACT	349	606	577	1142	901	2407
tQ(UUG)L	12	-	448650	448721	668	5975	AGAGAACGTCAACAATTTTAATCGTTCGTATCATCAAGAAGTTCCGATGTCCACGAGGTCTCTCCTCAGCGGAACTCATGGATCGTACGCTGCAGGTCGAC	AAAACTGTAGGCACAAAAAGCAGCATACGTCATTCGCAAAAAAGACGGTGTCGGTCTCGTAGGGCGTGCATCAATATTAGCTATCGATGAATTCGAGCTCG	CCTCAGCGGAACTCATGGAT	tag_13158_st	GGCGTGCATCAATATTAGCT	tag_13749_st	TGCATTTCAGCTTCGATGAC	CCGGATCAAAACCGAAAGT	TGGTTATCACTTTCGGTTTTGA	ACTCTTCGGTTGGTCCTTGA	281	537	476	1041	731	2237
tR(ACG)D	4	-	619969	620041	324	2071	CTGGTATCAGCAAATCCCGTATTTCAATAACTTCAAGAAATCTTGGATGTCCACGAGGTCTCTAAGGAGATCGACGCATAGATCGTACGCTGCAGGTCGAC	TCACTAGGTATAAAAATCAAAAGTCTAGAAAAATGTATAAAAAATCGGTGTCGGTCTCGTAGTATTTGGCGAACAGCGAGCTATCGATGAATTCGAGCTCG	AAGGAGATCGACGCATAGAT	tag_13076_st	TATTTGGCGAACAGCGAGCT	tag_13732_st	AATGCAGCCGAAGCAAGTAA	CCTGGAATCTTCTGGTTCGT	GGCTACGAACCAGAAGATTCC	GGGCTTCTTCCCTTCTTGTT	466	711	534	1112	977	2482
tR(ACG)E	5	-	492352	492424	394	7924	CTCCGGTATTACTCGAGCCCGTAATACAACACACTGAACATCCTAGATGTCCACGAGGTCTCTAATAGTAGGTCACAGCCGATCGTACGCTGCAGGTCGAC	GCCGGGTTACGATATCCGAAAAAGTTGATTAAAAGAAAAATAATCCGGTGTCGGTCTCGTAGCGATATAGGACATTCGAGCTATCGATGAATTCGAGCTCG	AATAGTAGGTCACAGCCGAT	tag_13110_st	CGATATAGGACATTCGAGCT	tag_13733_st	CATGAGACAAAACCCGTCCT	CCTGGAATCTTCTGGTTCGT	GGCTACGAACCAGAAGATTCC	GACTCCCTCCAGCATCAAGT	312	557	518	1096	807	2312
tR(ACG)J	10	+	233939	234011	2638	2345	TTGCGACATAGGCATACCTTGCCCTCAGAGATCTTTATATTCTTGGATGTCCACGAGGTCTCTATTCGGATGCTCGGACTCCTCGTACGCTGCAGGTCGAC	CTCTTCAATTTATAGAATGGTTGTGTTAGTGACAAAAAGAATATTCGGTGTCGGTCTCGTAGAGCCCGATGGTCTAGATGCTATCGATGAATTCGAGCTCG	ATTCGGATGCTCGGACTCCT	tag_13677_st	AGCCCGATGGTCTAGATGCT	tag_13816_st	CCCTACACGCAACCAAAGAT	AGGACTCGAACCTGGAATCTC	TGGCTACGAACCAGGAGATT	CTGATAGAGCAAGCGGTGAA	452	687	591	1168	1009	2514
tR(ACG)K	11	+	490968	491040	1313	324	TGATACTTAGGGTTCTCAATTTTTAATGTCTCTTAATAATTCTTGGATGTCCACGAGGTCTCTCAGGATTATAGGGATCGTCTCGTACGCTGCAGGTCGAC	CAATAACTGAAAAGATAATAAGAAAATTATAAAAGTAAAAAAATTCGGTGTCGGTCTCGTAGGGATTGTCCTGCATCGCTATATCGATGAATTCGAGCTCG	CAGGATTATAGGGATCGTCT	tag_13941_st	GGATTGTCCTGCATCGCTAT	tag_13289_st	CGATTCCTTCTTCCGCATT	CCTGGAATCTTCTGGTTCGT	GGCTACGAACCAGAAGATTCC	CACCTGACGGAAGAGAACCT	348	593	442	1020	767	2272
tR(ACG)L	12	+	374355	374427	2735	2811	CCGGTATTACTCGAGCCCGTAATAAAACAAAAACAATAAATCTTGGATGTCCACGAGGTCTCTCTGTCGCAGCCTTGGTAACTCGTACGCTGCAGGTCGAC	CAACAAAACTGAAGGGTAGCGACATAATTGTCGGAGCAAAAAAATCGGTGTCGGTCTCGTAGGGTACTTGTCGAGCTCTACTATCGATGAATTCGAGCTCG	CTGTCGCAGCCTTGGTAACT	tag_13414_st	GGTACTTGTCGAGCTCTACT	tag_13553_st	TGAGACAAAACCCGTCCTTC	CCTGGAATCTTCTGGTTCGT	GGCTACGAACCAGAAGATTCC	GAGCCCTCCAGTTGTGAAAG	311	556	492	1070	780	2285
tR(ACG)O	15	-	340299	340371	321	2043	TTTAGTACGTGTATCGATAAATATCTCTAATTTTCTCAAGATCTGGATGTCCACGAGGTCTCTACGGACGTGTAACATTCGATCGTACGCTGCAGGTCGAC	TAGCATAAAAGACCTTTGTAATTTCTATTCAATGTTAAAAAAAATCGGTGTCGGTCTCGTAGTTTGTTTCCACCCCGGAGCTATCGATGAATTCGAGCTCG	ACGGACGTGTAACATTCGAT	tag_13130_st	TTTGTTTCCACCCCGGAGCT	tag_13734_st	AATGAAATTGAAGCGCAAGG	CCTGGAATCTTCTGGTTCGT	GGCTACGAACCAGAAGATTCC	TGCCTAAAATGCCTGAAACA	466	711	532	1110	975	2480
tR(CCG)L TRR4	12	+	818609	818680	2515	632	AGATGAATAAAGAGCAGGAATTTACTATCTCTGATAATTTATTATGATGTCCACGAGGTCTCTAGTATGGGTCACATCCTCCTCGTACGCTGCAGGTCGAC	TATGCTTTTTCCTTAAAAATTAGAATAGTGCGCTAAAAAATTAAACGGTGTCGGTCTCGTAGGACTTCATGCACAGTATGCTATCGATGAATTCGAGCTCG	AGTATGGGTCACATCCTCCT	tag_13680_st	GACTTCATGCACAGTATGCT	tag_13820_st	CCTTGCATTTCAGCTTCCTC	ATCACAGCCACCGGAAGA	TGCTCCTCTAGTGCAATGGTT	CTCTCAGCTCTCGGCTCTTC	383	634	551	1100	887	2393
tR(CCU)J HSX1	10	+	538555	538626	2499	146	TATGCAACTTAGGTACCTCATATTTCTTAGAGTTCAACCAAGTTGGATGTCCACGAGGTCTCTCGCTTTAGAGACATAGGTCTCGTACGCTGCAGGTCGAC	GTCTGAATTTTTTCTATAAAGAAACGAAAAAAAAAAAATAATCAACGGTGTCGGTCTCGTAGTAGACGCTGGCCATTGCTATATCGATGAATTCGAGCTCG	CGCTTTAGAGACATAGGTCT	tag_13944_st	TAGACGCTGGCCATTGCTAT	tag_13293_st	ATGAGGCGGATATTTGTTGG	TACCATTACGCCAACGGAAC	AAGGAGAAGACTGCGGGTTC	TCGCTGTTCATTTTTCCAGA	485	763	552	1137	1053	2559
tR(UCU)B	2	+	405878	405949	627	1220	AGGAAACATGTTTTCGTTATTTCATAAAACCTTCAACAAATAGTAGATGTCCACGAGGTCTCTAATCATCCGTCGGCAGGTCTCGTACGCTGCAGGTCGAC	ACAAGCGCCCATTCTGACCATTAAACTATCACGGAAGAAACAAAGCGGTGTCGGTCTCGTAGGAGGCGTACCAACCTATGCTATCGATGAATTCGAGCTCG	AATCATCCGTCGGCAGGTCT	tag_13943_st	GAGGCGTACCAACCTATGCT	tag_13819_st	TGCCAACTTCTCCAATGATCT	GGTCGAACCCATAATCTTCTGA	GGTTCGACCCCCATCGTGAG	TGGCAACAGTACAGGGGAAC	554	793	536	1136	1082	2588
tR(UCU)E	5	+	138666	138737	5546	1026	CGTTAATATGGTGGAGTCAGCTGAGAAGTTTTTTCAATAAATAATGATGTCCACGAGGTCTCTACCATGAGCGAATGACTCCTCGTACGCTGCAGGTCGAC	TGCCGTATGTTCTGGTATTTACTGGTTAGGAATAGATAAAAAAAACGGTGTCGGTCTCGTAGTGTATCAGGCGCTCGATGCTATCGATGAATTCGAGCTCG	ACCATGAGCGAATGACTCCT	tag_13678_st	TGTATCAGGCGCTCGATGCT	tag_13817_st	GAAGAAGCTGAAATGCAAGGA	GGTCGAACCCATAATCTTCTGA	GGTTCGACCCCCATCGTGAG	GCGTTCGATTCCACTTTCTC	391	630	412	1012	795	2301
tR(UCU)G1	7	+	405470	405541	1783	235	ACTGACGCTTCTGATTTTGAGATTCAACACTTCCAACAAACAGTAGATGTCCACGAGGTCTCTACTGACGGATAGCCAGGTCTCGTACGCTGCAGGTCGAC	GGTACGCTGGCATGTCTTACCAATTTCAAGCTTATTCAAAAAAAGCGGTGTCGGTCTCGTAGCTCAGTAGACCCTAGGCTATATCGATGAATTCGAGCTCG	ACTGACGGATAGCCAGGTCT	tag_13942_st	CTCAGTAGACCCTAGGCTAT	tag_13290_st	TGACGGCAAATGATGAGAAA	GGTCGAACCCATAATCTTCTGA	GGTTCGACCCCCATCGTGAG	TTTACCGCCTTGTCCCTTAC	446	685	501	1101	939	2445
tR(UCU)G2	7	-	828723	828794	1171	322	GTTGGTATGTACTTATTAATAATTGAAAACTTCCAACAAACAGTAGATGTCCACGAGGTCTCTAGCGACTCTTTCCCATAGATCGTACGCTGCAGGTCGAC	AAGTTTTTTTACTAATGGGGCAAATCATTTTTATTGCAAAAAAAGCGGTGTCGGTCTCGTAGAACCGCGATGCAGATAGTATATCGATGAATTCGAGCTCG	AGCGACTCTTTCCCATAGAT	tag_13075_st	AACCGCGATGCAGATAGTAT	tag_13318_st	TTCTTCGGGTGTTGTCTTCC	GGTCGAACCCATAATCTTCTGA	GGTTCGACCCCCATCGTGAG	GATTAGAGGCTTGGCATTGG	525	764	335	935	852	2358
tR(UCU)G3	7	+	736340	736411	2405	1792	CGGTATTACTCGAGCCCGTAATTCAACACAAGTGTAATTTCAATAGATGTCCACGAGGTCTCTGAGACGCAGGCTTCTTAACTCGTACGCTGCAGGTCGAC	GAACAACATTATTCCCTTCAGCCAGGAAATTATTTAAAAAAACAACGGTGTCGGTCTCGTAGTCGAGCCGTACATTGATGCTATCGATGAATTCGAGCTCG	GAGACGCAGGCTTCTTAACT	tag_13415_st	TCGAGCCGTACATTGATGCT	tag_13818_st	TGAGACAAAACCCGTCCTTC	GGTCGAACCCATAATCTTCTGA	GGTTCGACCCCCATCGTGAG	GCAGGAATGACGACCAAAAT	319	558	372	972	683	2189
tR(UCU)J1	10	+	355374	355445	2988	579	TCAAAGCATAGTTTACCTTTAATCCCAATCTTCCAACAAACAGTAGATGTCCACGAGGTCTCTGAGTGGTGCTGATACCTCCTCGTACGCTGCAGGTCGAC	ACAAGCGCCCATTCTGACCATTAAACTATCACGGAAGAAACAAAGCGGTGTCGGTCTCGTAGTACTGAGCGCGATCGGCTATATCGATGAATTCGAGCTCG	GAGTGGTGCTGATACCTCCT	tag_13679_st	TACTGAGCGCGATCGGCTAT	tag_13291_st	ATCAATCCTTGCGTTTCAGC	GGTCGAACCCATAATCTTCTGA	GGTTCGACCCCCATCGTGAG	GTCGGTTGGATTGCCTTTT	394	633	462	1062	848	2354
tR(UCU)J2	10	-	374506	374577	707	1197	TTAGGTTTTACTATAATAAAGTAGTAAAACCTTCAACAAATAGTAGATGTCCACGAGGTCTCTATCACCGTTCCCAGGAGGATCGTACGCTGCAGGTCGAC	ACAAGCGCCCATTCTGACCATTAAACTATCACGGAAGAAACAAAGCGGTGTCGGTCTCGTAGCCTTCTGCGACATTGGAGCTATCGATGAATTCGAGCTCG	ATCACCGTTCCCAGGAGGAT	tag_13137_st	CCTTCTGCGACATTGGAGCT	tag_13736_st	ATTCACCTGCATCCCAAAAA	GGTCGAACCCATAATCTTCTGA	GGTTCGACCCCCATCGTGAG	ACTCGTGAGCCGTTTCAGTT	340	579	396	996	728	2234
tR(UCU)K	11	-	162487	162558	886	1827	CGCATAATTAGATCATATAACTGCTGGAACATCAAACAAATATTAGATGTCCACGAGGTCTCTAGGTGTTCACACAGCCCGATCGTACGCTGCAGGTCGAC	CATGCAATATCAAAAGTAACTCTTTTTGACTGCTGGTGTAAAAAACGGTGTCGGTCTCGTAGCCTTAGAGTCCCCGGAATCTATCGATGAATTCGAGCTCG	AGGTGTTCACACAGCCCGAT	tag_13107_st	CCTTAGAGTCCCCGGAATCT	tag_13846_st	CACGATTGTTCCTCATTCCA	GGTCGAACCCATAATCTTCTGAT	GGTTCGACCCCCATCGTGAG	TTCACTGCAAGACCACCATC	524	763	433	1033	949	2455
tR(UCU)M1	13	-	747892	747963	1539	1714	ACTAGAATGTCATCAGATGAAAAAGACGAAAGAAACATATGACTAGATGTCCACGAGGTCTCTAGTACCGACTCCCACTGGATCGTACGCTGCAGGTCGAC	AAAATTTAGAGAGGAACAATTGTTTTTAAAAAAAATACTAAAAAACGGTGTCGGTCTCGTAGCAGCCTATGACATCGGAGCTATCGATGAATTCGAGCTCG	AGTACCGACTCCCACTGGAT	tag_13162_st	CAGCCTATGACATCGGAGCT	tag_13735_st	AAACAAAGAGCTGCCATTCC	GGTCGAACCCATAATCTTCTGA	GGTTCGACCCCCATCGTGAG	TGGCAGAAACAAACCAATGA	446	685	462	1062	900	2406
tR(UCU)M2	13	-	131825	131896	253	1579	ATTTGTATTAGTAATATTTGTTTACCCAACAATTCAAGAAATTTAGATGTCCACGAGGTCTCTATAGTCGAGGGCATGCCGATCGTACGCTGCAGGTCGAC	TCCTATAAATTTAGAATTAGCATATTCAAAAAAGAAGAAACAAAGCGGTGTCGGTCTCGTAGAAGTGACGTGTCGCCAGACTATCGATGAATTCGAGCTCG	ATAGTCGAGGGCATGCCGAT	tag_13111_st	AAGTGACGTGTCGCCAGACT	tag_13472_st	ATCACTGTAGCCGCCCTATC	GGTCGAACCCATAATCTTCTGAT	GGTTCGACCCCCATCGTGAG	ACCAGGAACAGCCCTAGATG	526	765	414	1014	932	2438
tS(AGA)A	1	-	182522	182603	3241	1874	ACTGACATATCTCATTTTGAGATACAACAAATAACATACAATTTTGATGTCCACGAGGTCTCTTTTGAGTCCCACCAGGTGCTCGTACGCTGCAGGTCGAC	GAGTATGCTTTGAAGAGGTGAAATATCATCAGTAAAAAAAAATAACGGTGTCGGTCTCGTAGATGACCGTCTACCATAGGCTATCGATGAATTCGAGCTCG	TTTGAGTCCCACCAGGTGCT	tag_13830_st	ATGACCGTCTACCATAGGCT	tag_13795_st	ATGCAACGCAATCCTTTTTC	TCTTTCGCCTTAACCACTCG	CGAGTGGTTAAGGCGAAAGA	CCAAACGAGATGAAACAGCA	442	709	621	1172	1044	2540
tS(AGA)B	2	+	227075	227156	9605	480	TGACGGTTTATTTATTCTGGTAAGTTATGATATCATGTAAAACGAGATGTCCACGAGGTCTCTAATCGAAGATCCCGTAAGCTCGTACGCTGCAGGTCGAC	GTATTCCATTGACTTTACGTACTCTTATTACTGTCCAAAAAATAACGGTGTCGGTCTCGTAGAGCGCACTCTTCTCGATTATATCGATGAATTCGAGCTCG	AATCGAAGATCCCGTAAGCT	tag_13714_st	AGCGCACTCTTCTCGATTAT	tag_13359_st	AGGAAGCTGAAGTGCAAGGA	TCTTTCGCCTTAACCACTCG	CGAGTGGTTAAGGCGAAAGA	GGCCAACAACGTAAAACTGG	370	637	503	1054	854	2350
tS(AGA)D2	4	-	980974	981055	1765	12079	ACTGCATCATACTATCTAATAATATTCAAATTACTTGTAAATTGAGATGTCCACGAGGTCTCTCAGCGCGATTTGTAGAGTATCGTACGCTGCAGGTCGAC	TATTAAAGTAAAATTAAAAAGATTGAGGAAAATTTTTGGTAAAAACGGTGTCGGTCTCGTAGAACCAGGTCTGCATTAGGCTATCGATGAATTCGAGCTCG	CAGCGCGATTTGTAGAGTAT	tag_13311_st	AACCAGGTCTGCATTAGGCT	tag_13796_st	CCGGTAAATTGGAAGCTGAA	TCTTTCGCCTTAACCACTCG	CGAGTGGTTAAGGCGAAAGA	CTTTGCTCTTCGCCATCAGT	560	827	417	968	958	2454
tS(AGA)D3	4	+	1305630	1305712	2456	555	ACACTATCATTACTCTTCTGAAGACCAGATTACAATACAAATTAAGATGTCCACGAGGTCTCTCAGGGATGGTGATATTTGCTCGTACGCTGCAGGTCGAC	TGACTGACAAATTTTGTTGCTACCAAATAAAAACATTAAAAATAACGGTGTCGGTCTCGTAGTGACCGTCGGGAGTGATTATATCGATGAATTCGAGCTCG	CAGGGATGGTGATATTTGCT	tag_13844_st	TGACCGTCGGGAGTGATTAT	tag_13360_st	CGCCAGGTTTTGTTGATAAGA	TCTTTCGCCTTAACCACTCG	CGAGTGGTTAAGGCGAAAGA	GTGGGTGCGGAATCAGTTAG	500	767	552	1102	1033	2528
tS(AGA)E	5	+	86604	86685	425	252	TATTAGTTTTGACCTATGTGGGAAACAGAATTTTCAATGAGTTATGATGTCCACGAGGTCTCTTGGTGTTACCCACCTGCACTCGTACGCTGCAGGTCGAC	CTCGATCTGACGAACAAGGGAAATTGAAAAAAAAGAGAAAAATAACGGTGTCGGTCTCGTAGCATCGAAGGCAAGGTTATCTATCGATGAATTCGAGCTCG	TGGTGTTACCCACCTGCACT	tag_13451_st	CATCGAAGGCAAGGTTATCT	tag_13888_st	CTCCGCTATGGGTGAAGAAG	TCTTTCGCCTTAACCACTCG	CGAGTGGTTAAGGCGAAAGA	GACTAAAATGCCCGACCAGA	542	809	669	1220	1192	2688
tS(AGA)G	7	-	561662	561743	980	13655	TGCACGATTAGCTTCTTCAAACCAGGAAACAGCAATGTATACATTGATGTCCACGAGGTCTCTTTCGTCACGGCCAGATTGCTCGTACGCTGCAGGTCGAC	CTAATACTATTATCACAAAATAGACATCGGAAAACTCAAAAATAACGGTGTCGGTCTCGTAGATCAGTCGTGGATTGCGGCTATCGATGAATTCGAGCTCG	TTCGTCACGGCCAGATTGCT	tag_13839_st	ATCAGTCGTGGATTGCGGCT	tag_13797_st	GCTGAAACGCAAGGATTGAT	TCTTTCGCCTTAACCACTCG	CGAGTGGTTAAGGCGAAAGA	CTTGACGATGTGGGAACAAA	345	612	619	1170	945	2441
tS(AGA)H	8	-	133026	133107	979	1447	AAGGCATAAGATCCTGATATTATGCTTACGACTTATATAATAAGTGATGTCCACGAGGTCTCTATTTGAGCCGTGCCCGAACTCGTACGCTGCAGGTCGAC	AATACTGAATGACAAAATTTCCACAATTTTTTTTAAAAAAATTATCGGTGTCGGTCTCGTAGTCCTAGACCGAATATCGGCTATCGATGAATTCGAGCTCG	ATTTGAGCCGTGCCCGAACT	tag_13401_st	TCCTAGACCGAATATCGGCT	tag_13798_st	ACCAACAAGGAAATCGCAAC	TCTTTCGCCTTAACCACTCG	CGAGTGGTTAAGGCGAAAGA	ACAAGACTGCCCCATCAGAC	535	802	407	958	923	2419
tS(AGA)J	10	-	524012	524093	1964	1288	TGCCAGGTGGACAGTGTTGTCCTTAAACAAACTCAAGAGATTAAAGATGTCCACGAGGTCTCTGAAGTAGCTTACAGCATCCTCGTACGCTGCAGGTCGAC	ACTGTGCATTGTGTATGTACGAAAAGAAAGGGAAATAAAAAATAACGGTGTCGGTCTCGTAGATATTAGTCCGGGCAGGGCTATCGATGAATTCGAGCTCG	GAAGTAGCTTACAGCATCCT	tag_13665_st	ATATTAGTCCGGGCAGGGCT	tag_13799_st	GCCTTCTTTCGGTTCCTTCT	TCTTTCGCCTTAACCACTCG	CGAGTGGTTAAGGCGAAAGA	GGGCCAGCCTTATACAGAGA	573	840	460	1011	1014	2510
tS(AGA)M	13	-	259158	259239	742	982	AAGGAATCACAAGAAAACAGAATACACAAATAATCAAGTTAGTATGATGTCCACGAGGTCTCTGCTAAACAGCCTTGCGAACTCGTACGCTGCAGGTCGAC	AGCATGAGCGCAAAACTTAAAAATCCATCAAGAGGCAAAAAATAACGGTGTCGGTCTCGTAGGTGGGCTGCAACCCTACTATATCGATGAATTCGAGCTCG	GCTAAACAGCCTTGCGAACT	tag_13402_st	GTGGGCTGCAACCCTACTAT	tag_13273_st	TCGTGGGTTCGTAAATCCTC	TCTTTCGCCTTAACCACTCG	CGAGTGGTTAAGGCGAAAGA	AATCTGGTCCTGCCAAAGTG	479	746	635	1186	1095	2591
tS(CGA)C SUP61	3	+	227942	228042	2379	276	CATGTATAAAACCTACCGCTTTAAACCATAATTTCAAATCGAAATGATGTCCACGAGGTCTCTCGCCGATTGTATAATGCACTCGTACGCTGCAGGTCGAC	GAATAGGATTGTTTTAATCAACGATGTTATTTAAAAAAAATTAAACGGTGTCGGTCTCGTAGGAGGCTCTTCGAGTCTATCTATCGATGAATTCGAGCTCG	CGCCGATTGTATAATGCACT	tag_13449_st	GAGGCTCTTCGAGTCTATCT	tag_13885_st	GGCTCATCAAAACCAGGAAA	ACACCAGCAGGATTTGAACC	CTGGTTCAAATCCTGCTGGT	AATCTGTGAGGGTTGGCTTG	613	812	374	972	966	2443
tS(GCU)F	6	-	191513	191613	7011	3199	TTTACAACAAAATAGTTTACTTCATTGAACAAACCAAGAGATTCTGATGTCCACGAGGTCTCTGCTCCGATTAAGCAGATCCTCGTACGCTGCAGGTCGAC	GGTTTATTATAGAAGGATAAGAAGCAAAAATTTAAAAAAGAAATGCGGTGTCGGTCTCGTAGTATCAGTGTAAAGACGGGCTATCGATGAATTCGAGCTCG	GCTCCGATTAAGCAGATCCT	tag_13666_st	TATCAGTGTAAAGACGGGCT	tag_13801_st	CGAGTGGTAACGGGTATTGC	TGAGGAAATAGCAGGGCATC	GATGCCCTGCTATTTCCTCA	GCCAAAATGAATGTGATGGA	420	673	519	1065	920	2397
tS(GCU)O	15	+	274673	274773	454	1060	TAAAGTACTGTTGGGGTGCTCTTGCTGTGCATTGTAAGTAATCGTGATGTCCACGAGGTCTCTAGCGTAGAGCAATCTGCACTCGTACGCTGCAGGTCGAC	AGGATTGTAGAAGGATAAGAAGCAAGAATTCACAAAAAAGAAATGCGGTGTCGGTCTCGTAGGATGCTAGGGGACTATTACTATCGATGAATTCGAGCTCG	AGCGTAGAGCAATCTGCACT	tag_13452_st	GATGCTAGGGGACTATTACT	tag_13571_st	TCTGTCTTGTGGCAGTTTCG	TGAGGAAATAGCAGGGCATC	GATGCCCTGCTATTTCCTCA	CTAAATCGGGGAGCACTTGA	360	613	469	1015	810	2287
tS(UGA)I SUP17	9	+	248850	248931	1393	461	CGAAAAGTATCTACAATACTTGCTTAAATAACCTACATTGTTTTAGATGTCCACGAGGTCTCTCGGATATAGCATACTGCACTCGTACGCTGCAGGTCGAC	TGATAATCAGTAAGCGATAAAAAAAAAATAAAAATAAAAAAATAACGGTGTCGGTCTCGTAGAACGCTAGTTGAGGGTATCTATCGATGAATTCGAGCTCG	CGGATATAGCATACTGCACT	tag_13450_st	AACGCTAGTTGAGGGTATCT	tag_13886_st	GGGAAAAGGGCAATAGAGGA	ACCAGCAGGATTTGAACCAG	CTATGGCCGAGTGGTTAAGG	GCAAACGTAATCTGCCCACT	401	621	665	1209	993	2489
tS(UGA)P SUP16	16	+	689565	689646	497	886	ATGTTTTTAATACCTTCCGTTTTCTAACACTACCAGATTATTTTGGATGTCCACGAGGTCTCTCTATCGAGTTCGAGTAAGCTCGTACGCTGCAGGTCGAC	GGTGCTGACATGGTGGTTATTGAAAAATAATTTCAAAAAATAATACGGTGTCGGTCTCGTAGATTCCACGGTGGTCCATTATATCGATGAATTCGAGCTCG	CTATCGAGTTCGAGTAAGCT	tag_13713_st	ATTCCACGGTGGTCCATTAT	tag_13358_st	TGGCGACTACTTCCCAATCT	ACACCAGCAGGATTTGAACC	CTGGTTCAAATCCTGCTGGT	CAGAATGAGCGGATGTTTCA	309	527	481	1079	769	2265
tT(AGU)B	2	+	266378	266450	1649	3049	CATTTGTATAAGCAAATTCGCTACGCGACTCTCACATCAAAAACTGATGTCCACGAGGTCTCTTTTGGCGTCCAGACACAGCTCGTACGCTGCAGGTCGAC	TACATGAGTTTGGTGATCAGCTTAATTTTTCAGTATTCAAAAAAACGGTGTCGGTCTCGTAGAGACGATAGTAGCATGTGCTATCGATGAATTCGAGCTCG	TTTGGCGTCCAGACACAGCT	tag_13716_st	AGACGATAGTAGCATGTGCT	tag_13835_st	GCTGTCCTGGTGTAGCTGTG	GATTTGAACCGATGATCTCCA	AATGTGGAGATCATCGGTTCA	GGCACGAACACACAAAAGAA	433	670	519	1104	928	2433
tT(AGU)C	3	+	295484	295556	767	2488	ACCAGGTTTATTCAACCGGTAACATAGAAATATTCATACAATTAAGATGTCCACGAGGTCTCTTAGACAAAGGGAGTTGCACTCGTACGCTGCAGGTCGAC	GAACGCGGCGGCAACCTGGGTGTCACCGAATAACGTGATAAAAAACGGTGTCGGTCTCGTAGCGCGCCTAGTACCATATTATATCGATGAATTCGAGCTCG	TAGACAAAGGGAGTTGCACT	tag_13453_st	CGCGCCTAGTACCATATTAT	tag_13361_st	AGAGAAAGCTGGATGCAAGG	GATTTGAACCGATGATCTCCA	AATGTGGAGATCATCGGTTCA	TTTGCGTATTCCTATGTTGGTG	429	666	454	1039	859	2364
tT(AGU)D	4	-	434264	434336	206	1635	AGCTTGAAATACTCTAACTTACAATCAAATGAACACAAATCAGAAGATGTCCACGAGGTCTCTTCAGGTACGTAACGGAGTCTCGTACGCTGCAGGTCGAC	AACGATGACAGCGGTATCGTTGCATACTTAGAATACATAAAAATACGGTGTCGGTCTCGTAGCCCGGACTAGCATTTACTATATCGATGAATTCGAGCTCG	TCAGGTACGTAACGGAGTCT	tag_13930_st	CCCGGACTAGCATTTACTAT	tag_13274_st	TCCGATCTAATGGAAGCTGAA	GATTTGAACCGATGATCTCCA	AATGTGGAGATCATCGGTTCA	GTGTCCGATGTGTAGGCAAA	375	612	534	1119	885	2390
tT(AGU)I1	9	+	175031	175103	222	283	ATAAATAGTATAGCTTGATGAAGAGTACTGAACCAACAAGTACGAGATGTCCACGAGGTCTCTGACTAGATGTACGTACAGCTCGTACGCTGCAGGTCGAC	TTAGTACACTCATTACAAGGTGTATGACGTGCCGAAGAAAAAAATCGGTGTCGGTCTCGTAGCACGAGCGGTGATGTTATCTATCGATGAATTCGAGCTCG	GACTAGATGTACGTACAGCT	tag_13717_st	CACGAGCGGTGATGTTATCT	tag_13889_st	CGCCACTAACTCTTCCGTGT	TTGAACCGATGATCTCCACA	TGTGGAGATCATCGGTTCAA	TACAACGTCCCCTCTTCACC	467	707	456	1043	904	2409
tT(AGU)I2	9	+	325748	325820	287	1672	AAATGATATCCTTTATGCGATAATCTCATCTACCGTAAAATACGAGATGTCCACGAGGTCTCTCCGATCTGGGGATTTGCACTCGTACGCTGCAGGTCGAC	CATTCTTCCGTATTTGAAAAAGATTCTCTTTCAAAGAAAAAAAATCGGTGTCGGTCTCGTAGCCGCTCGCGTTCTATATTATATCGATGAATTCGAGCTCG	CCGATCTGGGGATTTGCACT	tag_13454_st	CCGCTCGCGTTCTATATTAT	tag_13362_st	TACTCCCCCGCATCATAAAC	GATTTGAACCGATGATCTCCA	TGGAGATCATCGGTTCAAATC	CTCGCTTGCATGGTTGTTTA	526	763	455	1044	961	2466
tT(AGU)J	10	-	59100	59172	703	1818	GTGGAATATAACCGTTAAAATAGGTCAGGCAAATATAAAATAGAAGATGTCCACGAGGTCTCTTACATGGGCTGAGAGATCCTCGTACGCTGCAGGTCGAC	AAAAAAAAAAAAAAAAAAAAATTAATTGCTAAAAAATCAAATATACGGTGTCGGTCTCGTAGAGGAGTCATTACCCACCTATATCGATGAATTCGAGCTCG	TACATGGGCTGAGAGATCCT	tag_13667_st	AGGAGTCATTACCCACCTAT	tag_13275_st	TCCTTGCATTTTCAGCTTCC	GATTTGAACCGATGATCTCCA	AATGTGGAGATCATCGGTTCA	CACGGTCTGGGTTTAGCTTC	482	719	599	1184	1057	2562
tT(AGU)N1	14	+	104805	104877	879	8926	ATTTTGTTAAGTAGCACTTGTATATCCGGTTTTCTCAAGTTCTGAGATGTCCACGAGGTCTCTATTTCGATGGGGGACCAGCTCGTACGCTGCAGGTCGAC	TCTCAAATCACCATCAGGCATGTTTACCGTAGAATAAAAATAATACGGTGTCGGTCTCGTAGAGATAGGTGCGTTCCACTCTATCGATGAATTCGAGCTCG	ATTTCGATGGGGGACCAGCT	tag_13718_st	AGATAGGTGCGTTCCACTCT	tag_13890_st	GAGCTGCGTTTGTTTTGTGA	TTGAACCGATGATCTCCACA	TGTGGAGATCATCGGTTCAA	GCCCGATATGATGGAAGAAA	436	676	476	1063	893	2398
tT(AGU)N2	14	-	560693	560765	1700	1934	ATTCGTTATATCTGACATTTGCTGGATCACAGACCGTAATAACGGGATGTCCACGAGGTCTCTCCACGGGATTGATGGAGTCTCGTACGCTGCAGGTCGAC	ATACACTATCTTACCTTTTGAATAGGAATGATGGAAAAAAAATTACGGTGTCGGTCTCGTAGATTCCGATCCAAGCTGGGCTATCGATGAATTCGAGCTCG	CCACGGGATTGATGGAGTCT	tag_13931_st	ATTCCGATCCAAGCTGGGCT	tag_13803_st	CTGTCTCTCACGCAGCAAAC	GATTTGAACCGATGATCTCCA	AATGTGGAGATCATCGGTTCA	TTGAAAACGCAACGTGAAAA	396	633	444	1029	816	2321
tT(AGU)O1	15	+	113802	113874	4362	1539	ATCTTGCTTGGTTCGCCTTTGAAGAGCGCAGCTTTCAGAGATTTAGATGTCCACGAGGTCTCTAGAGGTGGCCATCCATCACTCGTACGCTGCAGGTCGAC	TTTGTGGTACAAAAATATAAACAATTTTAAAATATTAAAAAAAAACGGTGTCGGTCTCGTAGAGGTCCTCTCCCACTATTATATCGATGAATTCGAGCTCG	AGAGGTGGCCATCCATCACT	tag_13455_st	AGGTCCTCTCCCACTATTAT	tag_13363_st	CCTTGCATTTCAGCTTCCTC	TTGAACCGATGATCTCCACA	TGGAGATCATCGGTTCAAATC	ATGATGATGAGCGGACCATT	388	628	419	1008	790	2295
tT(AGU)O2	15	-	354041	354113	440	351	TACTGACGTGTACCACTCTGAGAAACAACAAAATAACGGTTTACTGATGTCCACGAGGTCTCTCGCAATAAGGATTGGGAACTCGTACGCTGCAGGTCGAC	TGACGCTCAAAAAATATTTATATAGCAAAAGTGCACGACAAAAAACGGTGTCGGTCTCGTAGAGAGCGTCATAACGACCTATATCGATGAATTCGAGCTCG	CGCAATAAGGATTGGGAACT	tag_13404_st	AGAGCGTCATAACGACCTAT	tag_13276_st	TACCGGGGTGTCTTGAAAAT	TTGAACCGATGATCTCCACA	TGGAGATCATCGGTTCAAATC	ACTGTTGGCGATGACTTCCT	388	628	419	1008	790	2295
tT(CGU)K TRT2	11	-	46735	46806	4789	538	AAAGTATAGCGGAGCCACAAATTTAGCAGGTATAAAAATTACTCAGATGTCCACGAGGTCTCTAAACTAGCTGAACCGATCCTCGTACGCTGCAGGTCGAC	ATATATTATATATAAAAATTAAAAAATAGAAAATAAAATTTCAAACGGTGTCGGTCTCGTAGCCTTATGGTACATGATGGCTATCGATGAATTCGAGCTCG	AAACTAGCTGAACCGATCCT	tag_13668_st	CCTTATGGTACATGATGGCT	tag_13804_st	CGTAAAGCACGAAGGTGTTG	ATTACGAGTGCGATGCCTTAC	TGGGTTCAATTCCCACAGA	TGCCCGTCAGGATAGAAGTAA	571	831	610	1208	1192	2698
tT(UGU)G1	7	+	661749	661820	254	337	TAACAAATTCCTAGTTCTCAAATCTGAGTCTCTTGGTAAAAATTTGATGTCCACGAGGTCTCTGTGACGATTCATTACCAGCTCGTACGCTGCAGGTCGAC	ACAGAACTTCCGTACAACAAGCAAAAAAAGAGATATATAAAATTACGGTGTCGGTCTCGTAGGGAGAAGGTTCCATCACTCTATCGATGAATTCGAGCTCG	GTGACGATTCATTACCAGCT	tag_13719_st	GGAGAAGGTTCCATCACTCT	tag_13891_st	TTATTATCCGCCCCTCCAA	ACAAGTGCAACGCTCTACCA	TGGTAGAGCGTTGCACTTGT	AAGCAAAATGAAAACGTCCTG	544	807	420	985	945	2451
tT(UGU)G2	7	+	1004216	1004287	4488	167	TGTTCGATAAAACAACATCACTTTTTCTTGAAACTTCAAGGGTTTGATGTCCACGAGGTCTCTGCATACTAGCAGTCATCACTCGTACGCTGCAGGTCGAC	ATTAGGGGCGCCTCAATTATTAATACTGACAAATAAAAAGGAAACCGGTGTCGGTCTCGTAGGGTCCTACCTGAGCTATTATATCGATGAATTCGAGCTCG	GCATACTAGCAGTCATCACT	tag_13456_st	GGTCCTACCTGAGCTATTAT	tag_13364_st	CCAAACCCCTCACCAAAATA	ACAAGTGCAACGCTCTACCA	TGGTAGAGCGTTGCACTTGT	ATTTTGACCCATCACGGCTA	339	602	449	1014	769	2275
tT(UGU)P	16	+	744284	744355	897	843	TGCAGACACTTTGTCCCTTCTTGGAGGATACCCTACAGTGTAAAAGATGTCCACGAGGTCTCTGTTGACTCACACGGATCACTCGTACGCTGCAGGTCGAC	ATATAAAAAGAAGCTAAATAAGTGTTAACTTTAGGGAAAAAATTTCGGTGTCGGTCTCGTAGGACCTGACCTGACGTATTATATCGATGAATTCGAGCTCG	GTTGACTCACACGGATCACT	tag_13457_st	GACCTGACCTGACGTATTAT	tag_13365_st	GCAGCAGTGAGATTGACAGG	ACAAGTGCAACGCTCTACCA	TGGTAGAGCGTTGCACTTGT	GGCATCACTTGGAAAAGGAG	610	873	614	1179	1205	2711
tV(AAC)E1	5	+	438700	438773	1087	2894	TTGTAGATATATTCTATTTTTTAATGAAACTTTTTCAACAAATTAGATGTCCACGAGGTCTCTTATGGAGTCGGACTGAGTATCGTACGCTGCAGGTCGAC	CCTTTGTAAATTAACGTAAATTATAACGTTTTCGAAAAAAAAAATCGGTGTCGGTCTCGTAGTTATGGGTGACCCACTCCCTATCGATGAATTCGAGCTCG	TATGGAGTCGGACTGAGTAT	tag_13317_st	TTATGGGTGACCCACTCCCT	tag_13632_st	ACCTTGCATTTGTGGTCGTT	TGCCATAACCGACTAGACCA	TCGTGGTCTAGTCGGTTATGG	TGAGCGTTTACGGCCTACTT	362	633	576	1128	916	2420
tV(AAC)E2	5	+	469457	469530	13255	504	CTACAAGGTATTTGTTTCTTAAATGTTCATCTCCAAGAAATAATTGATGTCCACGAGGTCTCTACCGACTGGTGACGTTTGCTCGTACGCTGCAGGTCGAC	GACAGAGAAACAGAGTTACACTTTATGCTTGGCATATTTAAAAAACGGTGTCGGTCTCGTAGGATGCTATTCGACTGACTCTATCGATGAATTCGAGCTCG	ACCGACTGGTGACGTTTGCT	tag_13845_st	GATGCTATTCGACTGACTCT	tag_13896_st	CCGTTGTGCAATAGGGAGTT	TGCCATAACCGACTAGACCAC	TCGTGGTCTAGTCGGTTATGG	AAAGACAACGCAATGACGAA	436	707	587	1139	1001	2505
tV(AAC)G2	7	+	823482	823555	489	2992	ATGTGACCTATTCCCCTTTAATTGGATCAATCTTCCAATAAGAGTGATGTCCACGAGGTCTCTGCGAGTCACTATAGCTCACTCGTACGCTGCAGGTCGAC	TCCAGAGATATTGAAAAAAGCCTTATTAATGTAATCTTCAAAAAACGGTGTCGGTCTCGTAGGGGTCTACCTGACTACTTATATCGATGAATTCGAGCTCG	GCGAGTCACTATAGCTCACT	tag_13461_st	GGGTCTACCTGACTACTTAT	tag_13369_st	CGGATCTTGATTTGTGTGGA	GGGACGTTCTGCGTGTTAAG	TGCTTAACACGCAGAACGTC	GTCATCGCCTGTCTGTTTCA	612	859	625	1202	1216	2720
tV(AAC)G3	7	-	73829	73902	238	9139	TATGAAGCAAGTATCTTATCTTGGGGTTGTATATTTCAATTAAGTGATGTCCACGAGGTCTCTGGGCTATACCAATCTATCCTCGTACGCTGCAGGTCGAC	TATCTATCCCTGTAAATAAACTAATATAAAAATTCAAAAAAATAACGGTGTCGGTCTCGTAGAAGTTCGGATGACGCCCTATATCGATGAATTCGAGCTCG	GGGCTATACCAATCTATCCT	tag_13671_st	AAGTTCGGATGACGCCCTAT	tag_13280_st	GGCGCACATGAAGACCTATT	GGGACGTTCTGCGTGTTAAG	TGCTTAACACGCAGAACGTC	ACGATGGAGGATGCAAGAAG	377	624	393	970	749	2253
tV(AAC)H	8	+	85298	85371	1698	392	CCGGTATTACTCGAGCCCGTAATACAACATAATCAATAAGAATTTGATGTCCACGAGGTCTCTGCTTCACGGCCATCTAGTCTCGTACGCTGCAGGTCGAC	CCACTATACATTTTTCTAAAGAAAAAAAAAAAATTCAAAAAAAATCGGTGTCGGTCTCGTAGAAATATGGCGACATGTGGCTATCGATGAATTCGAGCTCG	GCTTCACGGCCATCTAGTCT	tag_13935_st	AAATATGGCGACATGTGGCT	tag_13808_st	CTTCTGCAATAGGCGCAATC	ACCGACTAGACCACGAAACC	TCGTGGTCTAGTCGGTTATGG	GCTCGCTCAATAGGTCTGGT	304	582	454	1006	743	2247
tV(AAC)J	10	+	378360	378433	859	989	AATCGATTAATTTCTGCTGAAAGCCCAAGCTTTCATAAATTAATAGATGTCCACGAGGTCTCTCGCTCGATGGACATTCAGCTCGTACGCTGCAGGTCGAC	TATAACAATACCAGGTTATTCTTGTGAATTAAAAAAACAAAAAATCGGTGTCGGTCTCGTAGCCGCGTTAGTGATATACTCTATCGATGAATTCGAGCTCG	CGCTCGATGGACATTCAGCT	tag_13725_st	CCGCGTTAGTGATATACTCT	tag_13897_st	GACTTATTGTCGGCTTGTTCG	TGCCATAACCGACTAGACCA	TCGTGGTCTAGTCGGTTATGG	CCTCTGGCTTTGTCCTTAGC	302	573	516	1068	796	2300
tV(AAC)K1	11	-	308144	308217	4224	2105	GCACTATAGATATGACTTTAGATGTCCGTTATTCAACAATTAAGTGATGTCCACGAGGTCTCTGAGGCTCATCAGCACTAACTCGTACGCTGCAGGTCGAC	AAAACGTCAACGAAAATGACGGAGATATCTGACGGAAAAAAAAATCGGTGTCGGTCTCGTAGATGGGTTCACGGATCCCTATATCGATGAATTCGAGCTCG	GAGGCTCATCAGCACTAACT	tag_13408_st	ATGGGTTCACGGATCCCTAT	tag_13281_st	GACCTCGCCACAGAGAAAAG	GGGACGTTCTGCGTGTTAAG	TTAACACGCAGAACGTCCCC	GGTAAGACATTGGGCGTCAT	308	555	477	1057	767	2271
tV(AAC)K2	11	+	379680	379753	657	3097	CGTACAACTATGCCACTTTAAAATGATCAATTTTACAGATTAATAGATGTCCACGAGGTCTCTATTGGACGTGGAGGCTCACTCGTACGCTGCAGGTCGAC	TGTGCGAGCTCAACTGACGAGCGTGATGAAGCCAAAAAAATTAATCGGTGTCGGTCTCGTAGAGATCCGTGCGATGCCTTATATCGATGAATTCGAGCTCG	ATTGGACGTGGAGGCTCACT	tag_13462_st	AGATCCGTGCGATGCCTTAT	tag_13370_st	CTCCAGTAATAGCGGGCATC	GGGACGTTCTGCGTGTTAAG	TGCTTAACACGCAGAACGTC	CCGATTTCATTACAGCAGCA	446	693	469	1046	894	2398
tV(AAC)L	12	-	687859	687932	1928	7068	TTTTTGTATAATTGGTGGTGTAACGTGGATTAAACATAAATAATAGATGTCCACGAGGTCTCTGGACCTACTTGATGTATCCTCGTACGCTGCAGGTCGAC	TCGCAATACTACTACATTTCTATGAAATATAACAGGTATAAAAAACGGTGTCGGTCTCGTAGAGGAGTTTAGGTCATTGGCTATCGATGAATTCGAGCTCG	GGACCTACTTGATGTATCCT	tag_13672_st	AGGAGTTTAGGTCATTGGCT	tag_13809_st	GTCCTTGCATTTCAGCTTCC	CCATAACCGACTAGACCACGA	TCGTGGTCTAGTCGGTTATGG	TCCAATTTACCCAAAGTGCAA	597	870	563	1115	1140	2644
tV(AAC)M1	13	-	372445	372518	559	1488	TTTATTAGTATAGGTTATTTTAGATGCAATTTTTCAATAAAACCTGATGTCCACGAGGTCTCTGCACTGGTCCGATTTAGTCTCGTACGCTGCAGGTCGAC	GAAGATGATTCGATACCGCAATATGCTGCTAAAGTGCTAAAAAAACGGTGTCGGTCTCGTAGAGATGCCTAGTCCGGCCTATATCGATGAATTCGAGCTCG	GCACTGGTCCGATTTAGTCT	tag_13936_st	AGATGCCTAGTCCGGCCTAT	tag_13282_st	GCTGAAACGCAAGGATTGAT	CCATAACCGACTAGACCACGA	TCGTGGTCTAGTCGGTTATGG	AAAGAGGCAGAACGAAGAACC	421	694	594	1146	995	2499
tV(AAC)M2	13	-	420588	420661	248	2841	AGTCCATAAAACCATAAGTATAGGTCCAGACCATCACAAATAACAGATGTCCACGAGGTCTCTAGAGGGCATCAGACCTAACTCGTACGCTGCAGGTCGAC	GCCAGACGGGCGTTAAAAAACTTTCCGTAACGGCTGAGATAAAAACGGTGTCGGTCTCGTAGTAGGACGCCTGAGATTGGCTATCGATGAATTCGAGCTCG	AGAGGGCATCAGACCTAACT	tag_13409_st	TAGGACGCCTGAGATTGGCT	tag_13810_st	CGTAGCCTTCATCAACAGCA	CCATAACCGACTAGACCACGA	TCGTGGTCTAGTCGGTTATGG	AGCCATTTTGTTCGCACTTT	363	636	633	1185	976	2480
tV(AAC)M3	13	-	586636	586709	1411	3294	GAGAAATGTAGCATACTCTTTATACAGAATTCTCCAACTTACTATGATGTCCACGAGGTCTCTATGAGGTCCTAGACACTCCTCGTACGCTGCAGGTCGAC	TTTATTTACGTTTTGATGTTTTCATGCGGGATGTCTTCAAAAAAACGGTGTCGGTCTCGTAGGCGCTCGACGAATATCCTATATCGATGAATTCGAGCTCG	ATGAGGTCCTAGACACTCCT	tag_13673_st	GCGCTCGACGAATATCCTAT	tag_13283_st	CCAAGCAGGAGTCAATCGTT	GGGACGTTCTGCGTGTTAAG	TGCTTAACACGCAGAACGTC	GAATCCATCCTCTTCGCTTG	358	605	378	955	715	2219
tV(AAC)O	15	-	663812	663885	301	321	ATTTCACTAAAGTTTCCTCGCTTGTTAAAGATTTCAACAAATAGTGATGTCCACGAGGTCTCTTTGTAGCTGACCCCACGTCTCGTACGCTGCAGGTCGAC	TTTAATACTATCAGCAAAAAGTTTAAGATAAAATATTCTTAAAAACGGTGTCGGTCTCGTAGACTTCATAGGAGGGAATGCTATCGATGAATTCGAGCTCG	TTGTAGCTGACCCCACGTCT	tag_13937_st	ACTTCATAGGAGGGAATGCT	tag_13811_st	TGGAAGCTGAAATGCAAAGA	CCATAACCGACTAGACCACGA	TCGTGGTCTAGTCGGTTATGG	TTTATTGAAGGCATGGCAGA	351	624	448	1000	779	2283
tV(CAC)D	4	-	1075472	1075544	733	3227	CCTTTATTAGTTCTTTATGAATCCTAAGCTGTCATCCGTAATATTGATGTCCACGAGGTCTCTGAGGTGTCACAGCCCTAACTCGTACGCTGCAGGTCGAC	TGGCCTAGGATTCAACTAAAAATATAGTAGTAGTGAAAAAACAAACGGTGTCGGTCTCGTAGCTAGATGGGCCCAGTCCTATATCGATGAATTCGAGCTCG	GAGGTGTCACAGCCCTAACT	tag_13410_st	CTAGATGGGCCCAGTCCTAT	tag_13284_st	ATGGTCGGTTCCAGAATGAA	TGTGAAGGCAACGTGATAGC	GCTATCACGTTGCCTTCACA	TTGATTTTCTTGGGTCGTGA	531	792	387	953	899	2404
tV(UAC)D	4	-	488797	488870	2908	1057	TTTAATATAGCGATATTGGGATTAAGTCATTTCCAATGGGTTTCCGATGTCCACGAGGTCTCTCGCTACCGTAAGACGAGTATCGTACGCTGCAGGTCGAC	TGGATATGTACTTCAAATTATTATCTTTTACGATAAAAAAGATTCCGGTGTCGGTCTCGTAGCTCAGACTGGATTACATGCTATCGATGAATTCGAGCTCG	CGCTACCGTAAGACGAGTAT	tag_13312_st	CTCAGACTGGATTACATGCT	tag_13813_st	TAGGCCGCATTCATGTTTTT	GGGATCTTCGCCGTGTAAA	TTTACACGGCGAAGATCCCGAG	AGAGATCCCGATTCATCCAA	484	731	465	1045	931	2435
tW(CCA)G1	7	-	287350	287455	518	1605	TTTCGGGGAGACAAGTAAGAATTTAATTCTTGGATATTTCAAGATGATGTCCACGAGGTCTCTACCCTACTTTCCATGAGTCTCGTACGCTGCAGGTCGAC	TCCTTCATTTAACCATCCTTAAATTATCACTTGCAGTATAAAAAACGGTGTCGGTCTCGTAGGACGACTGCCAACAGCGTATATCGATGAATTCGAGCTCG	ACCCTACTTTCCATGAGTCT	tag_13932_st	GACGACTGCCAACAGCGTAT	tag_13325_st	CACCTCTGGCGAATTTAAGG	CAGGAATTGAACCTGCAACC	ATCGAAGGGTTGCAGGTTC	CACTAATGTAATGGATGGCAACTG	365	566	572	1158	911	2383
tW(CCA)G2	7	-	878710	878815	1161	3526	ATTTCGGCAGACAAGTAAAATGTTATATCTTCGATATTTCAAGATGATGTCCACGAGGTCTCTAACGACGAGGACCTGGAACTCGTACGCTGCAGGTCGAC	TTGTCCAGCCTCTTTTTCCGAAAAAAAAAAAATTAAATAATAAAACGGTGTCGGTCTCGTAGTGTCAGACCTAGCTACATCTATCGATGAATTCGAGCTCG	AACGACGAGGACCTGGAACT	tag_13405_st	TGTCAGACCTAGCTACATCT	tag_13853_st	TCTTGTGTTTCAGCCCCATT	CAGGAATTGAACCTGCAACC	GGTTGCAGGTTCAATTCCTG	ATTGTTGCATGAGGGAAACC	627	828	373	966	981	2453
tW(CCA)J	10	-	415931	416036	3336	2091	ATGTCACCTATTAGAAAATGTTAGCCTAAATTTTCAACAAAAGTTGATGTCCACGAGGTCTCTGTCTACGGACGTATGATCCTCGTACGCTGCAGGTCGAC	GAATCACCATGAACGATATGGTGCAAAAAAAATAAAAAAATAAATCGGTGTCGGTCTCGTAGAGACGAGCCCCATGACCTATATCGATGAATTCGAGCTCG	GTCTACGGACGTATGATCCT	tag_13669_st	AGACGAGCCCCATGACCTAT	tag_13277_st	TTGGCGAGATAGTGGTAGGG	CAGGAATTGAACCTGCAACC	GGTTGCAGGTTCAATTCCTG	GGTTAGTGTCAGCGCCAAAG	527	728	430	1023	938	2410
tW(CCA)M	13	-	379303	379408	322	2685	TGTGGTTATATTGTTATACAGGTGTCAATATAAACAATAAAAGTTGATGTCCACGAGGTCTCTCGCTTAGGTACATTGAGTCTCGTACGCTGCAGGTCGAC	GGTCATTGTCGACGATAATCTCAAGCACAGGGCTAAAAAATAAATCGGTGTCGGTCTCGTAGTATTCGGCTGCACACTGGCTATCGATGAATTCGAGCTCG	CGCTTAGGTACATTGAGTCT	tag_13933_st	TATTCGGCTGCACACTGGCT	tag_13805_st	TCTGTTAGCCCGACACTCTG	CAGGAATTGAACCTGCAACC	GGTTGCAGGTTCAATTCCTG	TTCTCCCTCCCTTTCGTATG	354	555	449	1042	784	2256
tX(XXX)D	4	-	1150842	1150941	967	460	TAATGATATAGAAAACTAGAAACACTTTCACTTCAAAGTGTTTCAGATGTCCACGAGGTCTCTATGTAGTCCGCCCACTTGCTCGTACGCTGCAGGTCGAC	AAAAAAATCAAGCTTTAAAATAGTGGATGTAGAAAAAATAAAGTGCGGTGTCGGTCTCGTAGACAGGGCGCTGATTTCCTATATCGATGAATTCGAGCTCG	ATGTAGTCCGCCCACTTGCT	tag_13840_st	ACAGGGCGCTGATTTCCTAT	tag_13286_st	ATCCTTGCACTTCAGCTTCC	CCCAATGCCTAATTGCTTTT	GCGATGCCTGCTATTTCCT	CGAGGCCAAACTTTCTTGTT	295	528	434	979	688	2166
tY(GUA)D SUP2	4	+	946312	946400	1160	407	ACTGACGTATCTCATTTTGAGATACAACACCTCGCAAGAAATCGAGATGTCCACGAGGTCTCTTTTACGGAGCCCGATCAGCTCGTACGCTGCAGGTCGAC	TATCTCCAGAAAGCCGGCTAAAAGTAGGTGCTTGACATAAAAAAACGGTGTCGGTCTCGTAGTTAGGGCCTTGAGCGACTCTATCGATGAATTCGAGCTCG	TTTACGGAGCCCGATCAGCT	tag_13722_st	TTAGGGCCTTGAGCGACTCT	tag_13894_st	ATTTCAAGCCCTCGTGTTGT	GTCTTGCGCCTTAAACCAAC	AGTTGGTTTAAGGCGCAAGA	TTCCACTCCCCATTGAAAAA	404	668	424	970	808	2297
tY(GUA)F2 SUP6	6	-	210619	210707	551	230	AATGATAAAGGAATCTTTATATAGCAAAGTAATCAACAAAAACGAGATGTCCACGAGGTCTCTAGAGGCTCCTCCCATAGTCTCGTACGCTGCAGGTCGAC	TGTATTAATGAAAAAATAAAGCCAAAAAAATTTCAGAAAAAAATACGGTGTCGGTCTCGTAGAGAGTATGCTACCACCCTATATCGATGAATTCGAGCTCG	AGAGGCTCCTCCCATAGTCT	tag_13934_st	AGAGTATGCTACCACCCTAT	tag_13279_st	AGCCGTTGCGGTAGATAGAG	GTCTTGCGCCTTAAACCAAC	AGTTGGTTTAAGGCGCAAGA	CACAATAGCAATGGCCTTCA	354	618	428	974	762	2251
tY(GUA)J1 SUP7	10	+	354244	354332	1858	1692	ATTTGTATGATGAAACAAAATTTTTTGGTTATTAATCATTTATCAGATGTCCACGAGGTCTCTGGTTATCATTGCGACTCACTCGTACGCTGCAGGTCGAC	CAAGAGAAATTTCATCCACATTCTATTTAGAGCACATTAAAAAAACGGTGTCGGTCTCGTAGTAACTCGCTGCCATGACTCTATCGATGAATTCGAGCTCG	GGTTATCATTGCGACTCACT	tag_13460_st	TAACTCGCTGCCATGACTCT	tag_13895_st	TGCCACCAGTAAAGTTGCAC	GTCTTGCGCCTTAAACCAAC	AGTTGGTTTAAGGCGCAAGA	GAGGAAGCTGAAGTGCAAGG	316	580	496	1042	792	2281
tY(GUA)J2 SUP4	10	-	542956	543044	454	1018	TTGTATATGTGTTATGTAGTATACTCTTTCTTCAACAATTAAATAGATGTCCACGAGGTCTCTGGGCAGTGCTATAATATCCTCGTACGCTGCAGGTCGAC	ACTTGCAAGTCTGGGAAGTGAATGGAGACATAAAAAACAAAAAAACGGTGTCGGTCTCGTAGTTCAGGTCCCAAGACTGGCTATCGATGAATTCGAGCTCG	GGGCAGTGCTATAATATCCT	tag_13670_st	TTCAGGTCCCAAGACTGGCT	tag_13806_st	CTTCCCAACCGAAAATCACA	GTCTTGCGCCTTAAACCAAC	AGTTGGTTTAAGGCGCAAGA	TCGCTTGCTTTGTAGGAGGT	295	559	592	1138	867	2356
tY(GUA)M1 SUP5	13	+	168795	168883	1014	871	AAGGGTAGTACTGACACTTTATTTTGAAGTAAATCAAAATAGTCAGATGTCCACGAGGTCTCTGAAACACATCCCTATCAGCTCGTACGCTGCAGGTCGAC	AAAACTCAAACCTCACTAGGCCTGGAGAAAAAGGGAAAAAAAATACGGTGTCGGTCTCGTAGAAGTAGCGGGGACTATCCCTATCGATGAATTCGAGCTCG	GAAACACATCCCTATCAGCT	tag_13723_st	AAGTAGCGGGGACTATCCCT	tag_13631_st	ATCAATCCTTGCGTTTCAGC	GTCTTGCGCCTTAAACCAAC	AGTTGGTTTAAGGCGCAAGA	GGCACGAGTCCTACTGGAAG	284	548	457	1003	721	2210
U1 snRNA SNR19	14	-	230105	230672	1011	3023	TTAGCGTTAAAATATAGTTTTTTCTTGAATTTTTTTAAAATCCTCGATGTCCACGAGGTCTCTCAGGGCGACGAATGTACTCTCGTACGCTGCAGGTCGAC	TACTTTAAGAAAGAAATAAATAGAAAAATGTTCCATTTATTTCTGCGGTGTCGGTCTCGTAGTATGGACGTGAAGCCAGTATATCGATGAATTCGAGCTCG	CAGGGCGACGAATGTACTCT	tag_13898_st	TATGGACGTGAAGCCAGTAT	tag_13308_st	GGTGATCTACGCTGCCATC	TATTGGAAGCGCATGTTTGA	TTTGGTCGGGATTGTAGTTTG	TTTCTTGTTGCGGCTCTCTT	289	506	386	868	1051	2032
U2 snRNA LSR1	2	-	680688	681862	326	1228	CAGATTTATTCATTTTGTTTCTACTTGTTTTTTTTTTAAATCCCCGATGTCCACGAGGTCTCTTCGGACGTTAAAGATGTGCTCGTACGCTGCAGGTCGAC	AACTCATTCATGCGAAGTCAAAGGAAAAAAAAAATAAAAAAATAACGGTGTCGGTCTCGTAGTACGCAGGGAACGAGCTTATATCGATGAATTCGAGCTCG	TCGGACGTTAAAGATGTGCT	tag_13836_st	TACGCAGGGAACGAGCTTAT	tag_13371_st	GCAGACAAAGTAATGGGGTGTA	CCAAAAGGCAAAGAGATTCG	ATGGTATGGGGTGCTAGTGC	GTAAAAGACGCCAGCACGTT	244	504	960	869	1659	2031
U4 snRNA SNR14	5	-	167427	167586	542	4232	CGTTTAATGCATTTTCTTTTCTTTCACTTCCTTCCTTAATACTCCGATGTCCACGAGGTCTCTTTTACGGCGTCCAGACCTCTCGTACGCTGCAGGTCGAC	GAAAAATAAACAGTCCCTTTGAAAGAATGAATATCGGTAATGAAACGGTGTCGGTCTCGTAGCCAGGCGGTCGATAGCTTATATCGATGAATTCGAGCTCG	TTTACGGCGTCCAGACCTCT	tag_13899_st	CCAGGCGGTCGATAGCTTAT	tag_13372_st	TGCCTAAGTAACCTCTGCATTG	ATTTCCCGTGCATAAGGATG	GGATTCGTCCGAGATTGTGT	TTCCAGCTTCTATAACGTGAACTC	247	509	299	779	560	1946
U5 snRNA SNR7	7	-	939459	939672	467	251	TATATATTTTAAAATACTTTTCTTTCTTTTTGTTTTAAAACCTGCGATGTCCACGAGGTCTCTAGATGGTCCGACATACCTCTCGTACGCTGCAGGTCGAC	GGACTCATGAATCAAATTTGTAGAAAAATAAAATAGAAAAGATAACGGTGTCGGTCTCGTAGGAGTTACCTTGCACGCTTATATCGATGAATTCGAGCTCG	AGATGGTCCGACATACCTCT	tag_13900_st	GAGTTACCTTGCACGCTTAT	tag_13373_st	TCGATGACAAAGGGATAATGG	GGCCCACAGTTCTTGATGTT	TCAAGAACTGTGGGCCTTTT	CCTTTACGCGACTGGTCATT	292	519	478	910	754	2087
U6 snRNA SNR6	12	+	366235	366346	2119	1778	ACTATTTTCGGCTACTATAAATAAATGTTTTTTTCGCAACTATGTGATGTCCACGAGGTCTCTTTAGTGCGGTGCAGTTCCCTCGTACGCTGCAGGTCGAC	ATCTTCAAATGTACAAGTCACGATACTTCACTCGATGATAAAAAACGGTGTCGGTCTCGTAGAGGGTCCTACCAGTACCTCTATCGATGAATTCGAGCTCG	TTAGTGCGGTGCAGTTCCCT	tag_13637_st	AGGGTCCTACCAGTACCTCT	tag_13901_st	CCTTGCATTTCAGCTTCCAT	TTGACCAAATGTCCACGAAG	TCCCCTGCATAAGGATGAAC	TCGTACCATTGCATAGCTGTAAC	261	505	300	859	587	2022
