# Supplementary material for: A resource for functional profiling of noncoding RNA in the yeast Saccharomyces cerevisiae
Source: RNA. 2017 Aug;23(8):1166–71. doi: 10.1261/rna.061564.117 (PMC5513061; doi:10.1261/rna.061564.117)
Supplement: Supplemental Material [file supp_061564.117_Supplemental_File_2.xlsx]

## Sheet: Heterozygote
Supplementary File 2 - Collection
Heterozygote ncRNA KOs	Phenotype observed
CUT001/437
CUT002
CUT005
CUT008
CUT015
CUT040
CUT058
CUT083
CUT084/SUT068
CUT095
CUT102
CUT103
CUT123
CUT142
CUT170
CUT244
CUT248
CUT296
CUT332
CUT353/SUT758
CUT356
CUT374
CUT378
CUT379
CUT424
CUT436
CUT441
CUT442
CUT458
CUT461
CUT468
CUT474
CUT494
CUT502
CUT523
CUT541/542/SUT503
CUT572
CUT575
CUT645
CUT666
CUT672
CUT764
CUT775/SUT307
CUT782
CUT827
ncRNA NME1	essential
ncRNA RPR1	essential
ncRNA RUF21
ncRNA TLC1
SNR10
SNR11
SNR128 (U14)	essential
SNR128/SNR190	essential
SNR13
SNR17A
SNR189
SNR190
SNR3
SNR30	essential
SNR31
SNR32
SNR33
SNR34
SNR35
SNR36
SNR37
SNR39B
SNR4
SNR40
SNR41
SNR42
SNR43
SNR45
SNR46
SNR47
SNR48
SNR49
SNR5
SNR50
SNR51
SNR51/70/41
SNR52
SNR56
SNR57
SNR61/55/57
SNR62
SNR63
SNR64
SNR65
SNR66
SNR67
SNR69
SNR70
SNR71
SNR73
SNR74
SNR75
SNR76
SNR78
SNR79
SNR8
SNR80
SNR81
SNR82
SNR83
SNR84
SNR85
SNR86
SNR87
SNR9
SUT001
SUT004
SUT007
SUT010
SUT014
SUT019
SUT035
SUT042
SUT049
SUT053/468/CUT494
SUT055
SUT056
SUT058
SUT067
SUT071/483
SUT084/SUT499
SUT085
SUT087
SUT098
SUT107
SUT119
SUT123
SUT125
SUT126
SUT129
SUT131
SUT135
SUT142
SUT157/579
SUT167
SUT170
SUT171
SUT174
SUT193
SUT218/655
SUT219/656
SUT229/661
SUT233/CUT707
SUT234
SUT239/679
SUT249
SUT264
SUT274/698
SUT284/712
SUT285
SUT304/730
SUT305
SUT329
SUT346
SUT347
SUT348
SUT349/CUT354
SUT355
SUT361
SUT362
SUT385
SUT388
SUT398
SUT413
SUT417
SUT420/CUT425
SUT430
SUT431
SUT432
SUT463
SUT465
SUT469
SUT471
SUT473/CUT502
SUT477
SUT479
SUT492
SUT496
SUT500
SUT501
SUT509
SUT515
SUT518
SUT532
SUT539
SUT546/118
SUT553
SUT570
SUT571
SUT591
SUT593
SUT602/176
SUT616
SUT643
SUT729/CUT773
SUT733
SUT737/313
SUT764
SUT796
SUT812
SUT824
SUT827
SUT830
SUT834
SUT842/425
SUT847
tA(AGC)F
tA(AGC)G
tA(AGC)H
tA(AGC)J
tA(AGC)K2
tA(AGC)L
tA(AGC)M2
tA(AGC)P
tA(UGC)E
tA(UGC)G
tA(UGC)L
tA(UGC)O
tC(GCA)B
tC(GCA)G
tC(GCA)P1
tC(GCA)P2
tD(GUC)B
tD(GUC)D
tD(GUC)G2
tD(GUC)I1
tD(GUC)J1
tD(GUC)J2
tD(GUC)J3
tD(GUC)J4
tD(GUC)L2
tD(GUC)M
tD(GUC)O
tE(CUC)D
tE(CUC)I
tE(UUC)B
tE(UUC)C
tE(UUC)E1
tE(UUC)E2
tE(UUC)E3
tE(UUC)G1 SOE1
tE(UUC)G2
tE(UUC)G3
tE(UUC)I
tE(UUC)J
tE(UUC)K
tE(UUC)M
tE(UUC)P
tF(GAA)B
tF(GAA)D
tF(GAA)F
tF(GAA)G
tF(GAA)H1
tF(GAA)H2
tF(GAA)M
tF(GAA)N
tF(GAA)P1
tF(GAA)P2
tG(CCC)O SUF5
tG(GCC)B
tG(GCC)C SUF16
tG(GCC)D1
tG(GCC)D2
tG(GCC)E
tG(GCC)F1 SUF20
tG(GCC)G1
tG(GCC)J2
tG(GCC)O1
tG(GCC)O2 SUF17
tG(GCC)P1
tG(UCC)G SUF4
tG(UCC)N SUF6
tG(UCC)O SUF1
tH(GUG)E1
tH(GUG)E2
tH(GUG)G1
tH(GUG)G2
tH(GUG)K
tH(GUG)M
tI(AAU)B
tI(AAU)D
tI(AAU)E1
tI(AAU)G
tI(AAU)I2
tI(AAU)L1
tI(AAU)L2
tI(AAU)N2
tI(AAU)P1
tI(AAU)P2
tI(UAU)D
tI(UAU)L
tK(CUU)D1
tK(CUU)D2
tK(CUU)E2
tK(CUU)F
tK(CUU)G1
tK(CUU)G2
tK(CUU)G3
tK(CUU)K
tK(CUU)M
tK(CUU)P
tK(UUU)D
tK(UUU)G2
tK(UUU)L
tK(UUU)O
tK(UUU)P
tL(CAA)A SUP56
tL(CAA)G1
tL(CAA)G2 SUP54
tL(CAA)G3
tL(CAA)K
tL(CAA)L
tL(CAA)M
tL(CAA)N
tL(GAG)G
tL(UAA)B1
tL(UAA)D
tL(UAA)J SUP51
tL(UAA)K
tL(UAA)N
tL(UAG)J
tL(UAG)L1
tL(UAG)L2
tN(GUU)C
tN(GUU)F
tN(GUU)G
tN(GUU)K
tN(GUU)L
tN(GUU)N1
tN(GUU)N2
tN(GUU)O1
tP(AGG)C SUF2
tP(AGG)N SUF10
tP(UGG)A TRN1
tP(UGG)F SUF9
tP(UGG)L
tP(UGG)M SUF7
tP(UGG)N2
tP(UGG)O3
tQ(CUG)M CDC65
tQ(UUG)B
tQ(UUG)C
tQ(UUG)D1
tQ(UUG)D3
tQ(UUG)E1
tQ(UUG)E2
tQ(UUG)L
tR(ACG)D
tR(ACG)E
tR(ACG)J
tR(ACG)K
tR(ACG)L
tR(ACG)O
tR(CCG)L TRR4	essential
tR(UCU)B
tR(UCU)E
tR(UCU)G1
tR(UCU)G2
tR(UCU)G3
tR(UCU)J1
tR(UCU)J2
tR(UCU)K
tR(UCU)M1
tR(UCU)M2
tS(AGA)B
tS(AGA)D2
tS(AGA)D3
tS(AGA)E
tS(AGA)G
tS(AGA)H
tS(AGA)J
tS(AGA)M
tS(CGA)C SUP61	essential
tS(GCU)F
tS(GCU)L
tS(GCU)O
tS(UGA)I SUP17
tS(UGA)P SUP16
tT(AGU)B
tT(AGU)C
tT(AGU)D
tT(AGU)I1
tT(AGU)I2
tT(AGU)J
tT(AGU)N1
tT(AGU)N2
tT(AGU)O1
tT(CGU)K TRT2	essential
tT(UGU)G1
tT(UGU)G2
tT(UGU)H
tT(UGU)P
tV(AAC)E1
tV(AAC)E2
tV(AAC)G2
tV(AAC)G3
tV(AAC)H
tV(AAC)J
tV(AAC)K1
tV(AAC)K2
tV(AAC)L
tV(AAC)M1
tV(AAC)M2
tV(AAC)M3
tV(AAC)O
tV(CAC)D
tV(UAC)D
tW(CCA)G1
tW(CCA)G2
tW(CCA)J
tW(CCA)M
tX(XXX)D
tY(GUA)D SUP2
tY(GUA)F2 SUP6
tY(GUA)J1 SUP7
tY(GUA)J2 SUP4
tY(GUA)M1 SUP5
U1 snRNA SNR19	essential
U2 snRNA LSR1	essential
U4 snRNA SNR14	essential
U5 snRNA SNR7	essential
U6 snRNA SNR6	essential

## Sheet: Mat a
Mat a ncRNA KOs	Genotype
CUT001	(-)lys2
CUT001/437	(-)met15
CUT002	(-)met15
CUT005	(-)met15
CUT008	(-)met15
CUT015	(-)lys2
CUT040	(-)met15
CUT058	(-)met15
CUT083	(-)met15
CUT084/SUT068	(-)met15
CUT095	(-)met15
CUT102	(-)met15
CUT103	(-)met15
CUT123	(-)met15
CUT142	(-)met15
CUT150	(-)met15
CUT170	(-)met15
CUT244	(-)met15
CUT248	(-)met15
CUT277	(-)met15
CUT296	(-)met15
CUT332	(-)lys2
CUT353/SUT758	(-)met15
CUT356	(-)met15
CUT379	(-)met15
CUT424	(-)met15
CUT436	(-)met15
CUT441	(-)met15
CUT442	(-)met15
CUT458	(-)met15
CUT461	(-)met15
CUT462	(-)met15
CUT468	(-)met15
CUT474	(-)lys2
CUT494	(-)lys2
CUT541/542/SUT503	(-)met15
CUT546	(-)met15
CUT572	(-)met15
CUT575	(-)lys2
CUT645	(-)met15
CUT666	(-)met15
CUT672	(-)lys2
CUT764	(-)met15
CUT782	(-)met15
CUT816	(-)met15
ncRNA RUF21	(-)met15
SNR10	(-)met15
SNR11	(-)met15
SNR13	(-)met15
SNR17A	(-)met15
SNR17B	(-)met15
SNR189	(-)met15
SNR3	(-)met15
SNR31	(-)met15
SNR32	(-)met15
SNR33	(-)met15
SNR34	(-)lys2
SNR36	(-)met15
SNR37	(-)lys2
SNR39B	(-)met15
SNR4	(-)lys2
SNR41	(-)met15
SNR42	(-)met15
SNR46	(-)met15
SNR49	(-)met15
SNR5	(-)lys2
SNR50	(-)met15
SNR51	(-)lys2
SNR51/70/41	(-)met15
SNR52	(-)met15
SNR56	(-)met15
SNR57	(-)met15
SNR61	(-)met15
SNR61/55/57	(-)lys2
SNR62	(-)met15
SNR64	(-)met15
SNR65	(-)met15
SNR66	(-)lys2
SNR67	(-)met15
SNR69	(-)met15
SNR70	(-)met15
SNR71	(-)lys2
SNR72	(-)met15
SNR72/73/74/75/76/77/78	(-)met15
SNR73	(-)met15
SNR74	(-)met15
SNR75	(-)met15
SNR76	(-)met15
SNR77	(-)met15
SNR78	(-)met15
SNR79	(-)met15
SNR8	(-)met15
SNR80	(-)met15
SNR81	(-)met15
SNR82	(-)met15
SNR83	(-)lys2
SNR84	(-)met15
SNR85	(-)met15
SNR86	(-)met15
SNR87	(-)met15
SNR9	(-)lys2
SUT001	(-)met15
SUT004	(-)met15
SUT010	(-)met15
SUT014	(-)met15
SUT035	(-)met15
SUT042	(-)met15
SUT049	(-)met15
SUT053/468/CUT494	(-)met15
SUT055	(-)met15
SUT056	(-)met15
SUT058	(-)met15
SUT067	(-)met15
SUT071/483	(-)met15
SUT098	(-)met15
SUT107	(-)met15
SUT119	(-)met15
SUT125	(-)met15
SUT126	(-)met15
SUT129	(-)met15
SUT131	(-)met15
SUT142	(-)met15
SUT167	(-)met15
SUT171	(-)met15
SUT174	(-)met15
SUT193	(-)met15
SUT211	(-)met15
SUT218/655	(-)met15
SUT219/656	(-)met15
SUT233/CUT707	(-)met15
SUT234	(-)met15
SUT239/679	(-)met15
SUT249	(-)met15
SUT264	(-)met15
SUT274/698	(-)met15
SUT284/712	(-)met15
SUT304/730	(-)met15
SUT305	(-)met15
SUT329	(-)met15
SUT346	(-)met15
SUT347	(-)met15
SUT348	(-)met15
SUT355	(-)met15
SUT361	(-)met15
SUT362	(-)met15
SUT385	(-)lys2
SUT388	(-)lys2
SUT398	(-)met15
SUT413	(-)met15
SUT417	(-)met15
SUT418	(-)met15
SUT420/CUT425	(-)met15
SUT430	(-)met15
SUT431	(-)met15
SUT463	(-)met15
SUT465	(-)met15
SUT469	(-)met15
SUT471	(-)met15
SUT473/CUT502	(-)met15
SUT477	(-)lys2
SUT479	(-)met15
SUT480	(-)met15
SUT492	(-)met15
SUT496	(-)met15
SUT500	(-)met15
SUT501	(-)lys2
SUT515	(-)met15
SUT518	(-)lys2
SUT532	(-)met15
SUT539	(-)lys2
SUT553	(-)met15
SUT570	(-)met15
SUT571	(-)met15
SUT591	(-)met15
SUT602/176	(-)met15
SUT616	(-)met15
SUT643	(-)met15
SUT733	(-)met15
SUT737/313	(-)met15
SUT764	(-)met15
SUT796	(-)met15
SUT824	(-)met15
SUT827	(-)met15
SUT830	(-)lys2
SUT834	(-)met15
SUT842/425	(-)met15
SUT847	(-)met15
tA(AGC)F	(-)met15
tA(AGC)G	(-)met15
tA(AGC)H	(-)lys2
tA(AGC)K2	(-)met15
tA(AGC)M2	(-)met15
tA(UGC)A	(-)met15
tA(UGC)E	(-)met15
tA(UGC)G	(-)lys2
tA(UGC)L	(-)met15
tA(UGC)O	(-)met15
tC(GCA)B	(-)met15
tC(GCA)G	(-)met15
tC(GCA)P1	(-)lys2
tC(GCA)P2	(-)met15
tD(GUC)G1	(-)met15
tD(GUC)G2	(-)met15
tD(GUC)I1	(-)met15
tD(GUC)J1	(-)met15
tD(GUC)J2	(-)met15
tD(GUC)J3	(-)met15
tD(GUC)J4	(-)met15
tD(GUC)L2	(-)met15
tD(GUC)M	(-)lys2
tD(GUC)N	(-)met15
tD(GUC)O	(-)lys2
tE(CUC)D	(-)lys2
tE(CUC)I	(-)met15
tE(UUC)B	(-)met15
tE(UUC)C	(-)met15
tE(UUC)E1	(-)met15
tE(UUC)E2	(-)met15
tE(UUC)G1 SOE1	(-)lys2
tE(UUC)G2	(-)met15
tE(UUC)G3	(-)met15
tE(UUC)I	(-)lys2
tE(UUC)J	(-)met15
tE(UUC)K	(-)lys2
tE(UUC)M	(-)met15
tE(UUC)P	(-)met15
tF(GAA)D	(-)lys2
tF(GAA)F	(-)met15
tF(GAA)G	(-)lys2
tF(GAA)H1	(-)met15
tF(GAA)H2	(-)met15
tF(GAA)M	(-)met15
tF(GAA)N	(-)met15
tF(GAA)P1	(-)lys2
tF(GAA)P2	(-)met15
tG(CCC)O SUF5	(-)lys2
tG(GCC)C SUF16	(-)met15
tG(GCC)D1	(-)met15
tG(GCC)D2	(-)lys2
tG(GCC)E	(-)met15
tG(GCC)F1 SUF20	(-)met15
tG(GCC)G1	(-)met15
tG(GCC)G2	(-)met15
tG(GCC)J2	(-)met15
tG(GCC)M	(-)met15
tG(GCC)O1	(-)met15
tG(GCC)O2 SUF17	(-)met15
tG(GCC)P1	(-)met15
tG(UCC)G SUF4	(-)lys2
tG(UCC)N SUF6	(-)met15
tH(GUG)E1	(-)met15
tH(GUG)G1	(-)met15
tH(GUG)G2	(-)met15
tH(GUG)K	(-)met15
tH(GUG)M	(-)met15
tI(AAU)B	(-)met15
tI(AAU)D	(-)lys2
tI(AAU)E1	(-)lys2
tI(AAU)G	(-)met15
tI(AAU)I2	(-)lys2
tI(AAU)L1	(-)lys2
tI(AAU)L2	(-)met15
tI(AAU)P1	(-)lys2
tI(AAU)P2	(-)met15
tI(UAU)D	(-)met15
tK(CUU)D1	(-)met15
tK(CUU)D2	(-)met15
tK(CUU)E2	(-)met15
tK(CUU)F	(-)lys2
tK(CUU)G1	(-)met15
tK(CUU)G2	(-)met15
tK(CUU)I	(-)met15
tK(CUU)M	(-)met15
tK(CUU)P	(-)met15
tK(UUU)D	(-)met15
tK(UUU)G2	(-)met15
tK(UUU)L	(-)met15
tK(UUU)P	(-)met15
tL(CAA)A SUP56	(-)met15
tL(CAA)C SUP53	(-)met15
tL(CAA)G1	(-)lys2
tL(CAA)G2 SUP54	(-)met15
tL(CAA)G3	(-)met15
tL(CAA)K	(-)met15
tL(CAA)L	(-)met15
tL(CAA)M	(-)met15
tL(GAG)G	(-)met15
tL(UAA)B1	(-)met15
tL(UAA)D	(-)met15
tL(UAA)J SUP51	(-)met15
tL(UAA)K	(-)met15
tL(UAA)L	(-)met15
tL(UAA)N	(-)met15
tL(UAG)J	(-)met15
tL(UAG)L2	(-)met15
tM(CAU)C	(-)met15
tN(GUU)F	(-)met15
tN(GUU)G	(-)met15
tN(GUU)K	(-)met15
tN(GUU)L	(-)lys2
tN(GUU)N1	(-)met15
tN(GUU)N2	(-)met15
tN(GUU)O1	(-)met15
tP(AGG)C SUF2	(-)met15
tP(AGG)N SUF10	(-)met15
tP(UGG)F SUF9	(-)met15
tP(UGG)L	(-)met15
tP(UGG)M SUF7	(-)lys2
tP(UGG)N2	(-)met15
tQ(CUG)M CDC65	(-)met15
tQ(UUG)B	(-)met15
tQ(UUG)C	(-)met15
tQ(UUG)D1	(-)lys2
tQ(UUG)D3	(-)met15
tQ(UUG)E1	(-)met15
tQ(UUG)E2	(-)met15
tQ(UUG)L	(-)lys2
tR(ACG)D	(-)met15
tR(ACG)E	(-)met15
tR(ACG)J	(-)met15
tR(ACG)L	(-)met15
tR(ACG)O	(-)met15
tR(UCU)G2	(-)met15
tR(UCU)G3	(-)met15
tR(UCU)J1	(-)met15
tR(UCU)J2	(-)met15
tR(UCU)K	(-)met15
tR(UCU)M1	(-)met15
tR(UCU)M2	(-)met15
tS(AGA)A	(-)met15
tS(AGA)B	(-)met15
tS(AGA)D2	(-)met15
tS(AGA)D3	(-)met15
tS(AGA)G	(-)met15
tS(AGA)H	(-)lys2
tS(AGA)J	(-)met15
tS(AGA)M	(-)met15
tS(GCU)L	(-)met15
tS(GCU)O	(-)lys2
tS(UGA)I SUP17	(-)met15
tS(UGA)P SUP16	(-)met15
tT(AGU)B	(-)met15
tT(AGU)C	(-)met15
tT(AGU)I1	(-)met15
tT(AGU)I2	(-)met15
tT(AGU)N1	(-)met15
tT(AGU)N2	(-)met15
tT(AGU)O1	(-)lys2
tT(AGU)O2	(-)met15
tT(CGU)K TRN1	(-)lys2
tT(UGU)G1	(-)lys2
tT(UGU)G2	(-)lys2
tT(UGU)P	(-)met15
tV(AAC)E1	(-)met15
tV(AAC)E2	(-)lys2
tV(AAC)G2	(-)lys2
tV(AAC)G3	(-)met15
tV(AAC)J	(-)met15
tV(AAC)K2	(-)met15
tV(AAC)L	(-)met15
tV(AAC)M1	(-)met15
tV(AAC)M2	(-)met15
tV(AAC)M3	(-)met15
tV(AAC)O	(-)met15
tV(CAC)D	(-)met15
tW(CCA)G1	(-)met15
tW(CCA)G2	(-)met15
tW(CCA)J	(-)met15
tW(CCA)M	(-)met15
tX(XXX)D	(-)met15
tY(GUA)D SUP2	(-)met15
tY(GUA)J1 SUP7	(-)met15
tY(GUA)M1 SUP5	(-)met15

## Sheet: Mat α
Mat α ncRNA KOs	Genotype
CUT001/437	(-)lys2
CUT001/437	(-)lys2
CUT002	(-)lys2
CUT008	(-)lys2
CUT015	(-)met15
CUT040	(-)lys2
CUT083	(-)lys2
CUT084/SUT068	(-)lys2
CUT095	(-)lys2
CUT102	(-)lys2
CUT103	(-)lys2
CUT123	(-)lys2
CUT142	(-)lys2
CUT150	(-)lys2
CUT170	(-)lys2
CUT244	(-)lys2
CUT248	(-)lys2
CUT277	(-)lys2
CUT296	(-)lys2
CUT332	(-)met15
CUT353/SUT758	(-)lys2
CUT356	(-)lys2
CUT379	(-)lys2
CUT424	(-)lys2
CUT436	(-)lys2
CUT441	(-)lys2
CUT442	(-)met15
CUT458	(-)lys2
CUT461	(-)lys2
CUT462	(-)lys2
CUT468	(-)lys2
CUT474	(-)met15
CUT494	(-)met15
CUT541/542/SUT503	(-)lys2
CUT547	(-)lys2
CUT572	(-)lys2
CUT575	(-)met15
CUT645	(-)lys2
CUT666	(-)lys2
CUT672	(-)met15
CUT764	(-)lys2
CUT782	(-)lys2
CUT816	(-)lys2
ncRNA RUF21	(-)lys2
SNR10	(-)lys2
SNR11	(-)lys2
SNR13	(-)lys2
SNR17A	(-)lys2
SNR17B	(-)lys2
SNR189	(-)lys2
SNR3	(-)lys2
SNR31	(-)lys2
SNR32	(-)lys2
SNR33	(-)lys2
SNR34	(-)lys2
SNR35	(-)lys2
SNR36	(-)lys2
SNR37	(-)met15
SNR39B	(-)lys2
SNR4	(-)met15
SNR41	(-)lys2
SNR42	(-)lys2
SNR43	(-)lys2
SNR45	(-)lys2
SNR46	(-)lys2
SNR47	(-)met15
SNR48	(-)lys2
SNR49	(-)lys2
SNR5	(-)met15
SNR50	(-)lys2
SNR51	(-)met15
SNR51/70/41	(-)lys2
SNR52	(-)lys2
SNR56	(-)lys2
SNR57	(-)lys2
SNR61	(-)lys2
SNR61/55/57	(-)met15
SNR62	(-)lys2
SNR63	(-)lys2
SNR64	(-)lys2
SNR65	(-)lys2
SNR66	(-)met15
SNR67	(-)lys2
SNR69	(-)lys2
SNR70	(-)lys2
SNR71	(-)lys2
SNR72	(-)lys2
SNR72/73/74/75/76/77/78	(-)lys2
SNR73	(-)lys2
SNR74	(-)lys2
SNR75	(-)lys2
SNR76	(-)lys2
SNR77	(-)lys2
SNR78	(-)lys2
SNR79	(-)lys2
SNR8	(-)lys2
SNR80	(-)lys2
SNR81	(-)lys2
SNR82	(-)lys2
SNR83	(-)met15
SNR84	(-)lys2
SNR85	(-)lys2
SNR86	(-)lys2
SNR87	(-)lys2
SNR9	(-)met15
SUT001	(-)lys2
SUT004	(-)lys2
SUT007	(-)lys2
SUT010	(-)lys2
SUT014	(-)lys2
SUT019	(-)lys2
SUT035	(-)lys2
SUT042	(-)lys2
SUT049	(-)lys2
SUT053/468/CUT494	(-)lys2
SUT055	(-)lys2
SUT056	(-)lys2
SUT058	(-)lys2
SUT067	(-)lys2
SUT071/483	(-)lys2
SUT085	(-)lys2
SUT098	(-)lys2
SUT107	(-)lys2
SUT119	(-)lys2
SUT123	(-)lys2
SUT125	(-)lys2
SUT126	(-)lys2
SUT129	(-)lys2
SUT131	(-)lys2
SUT135	(-)lys2
SUT167	(-)lys2
SUT171	(-)lys2
SUT174	(-)lys2
SUT193	(-)lys2
SUT211	(-)lys2
SUT218/655	(-)lys2
SUT219/656	(-)lys2
SUT233/CUT707	(-)lys2
SUT234	(-)lys2
SUT239/679	(-)lys2
SUT249	(-)lys2
SUT274/698	(-)lys2
SUT284/712	(-)lys2
SUT304/730	(-)lys2
SUT305	(-)lys2
SUT329	(-)lys2
SUT346	(-)lys2
SUT347	(-)lys2
SUT355	(-)lys2
SUT361	(-)lys2
SUT362	(-)lys2
SUT385	(-)met15
SUT388	(-)met15
SUT390	(-)lys2
SUT398	(-)lys2
SUT413	(-)lys2
SUT417	(-)lys2
SUT418	(-)lys2
SUT420/CUT425	(-)lys2
SUT426	(-)lys2
SUT430	(-)lys2
SUT431	(-)lys2
SUT432	(-)lys2
SUT465	(-)lys2
SUT469	(-)lys2
SUT471	(-)lys2
SUT473/CUT502	(-)lys2
SUT477	(-)met15
SUT479	(-)lys2
SUT492	(-)lys2
SUT501	(-)met15
SUT515	(-)lys2
SUT518	(-)met15
SUT532	(-)lys2
SUT539	(-)met15
SUT553	(-)lys2
SUT570	(-)lys2
SUT571	(-)lys2
SUT591	(-)lys2
SUT602/176	(-)lys2
SUT616	(-)lys2
SUT733	(-)lys2
SUT737/313	(-)lys2
SUT764	(-)lys2
SUT796	(-)lys2
SUT824	(-)lys2
SUT827	(-)lys2
SUT830	(-)met15
SUT834	(-)lys2
SUT842/425	(-)lys2
SUT847	(-)lys2
tA(AGC)F	(-)lys2
tA(AGC)G	(-)lys2
tA(AGC)H	(-)met15
tA(AGC)J	(-)lys2
tA(AGC)L	(-)lys2
tA(AGC)M2	(-)lys2
tA(UGC)A	(-)lys2
tA(UGC)G	(-)met15
tA(UGC)L	(-)lys2
tA(UGC)O	(-)lys2
tC(GCA)P1	(-)met15
tD(GUC)B	(-)lys2
tD(GUC)G1	(-)lys2
tD(GUC)G2	(-)lys2
tD(GUC)I1	(-)lys2
tD(GUC)J1	(-)lys2
tD(GUC)J2	(-)lys2
tD(GUC)J3	(-)lys2
tD(GUC)J4	(-)lys2
tD(GUC)L2	(-)lys2
tD(GUC)M	(-)met15
tD(GUC)O	(-)met15
tE(CUC)D	(-)met15
tE(CUC)I	(-)lys2
tE(UUC)B	(-)lys2
tE(UUC)E1	(-)lys2
tE(UUC)E2	(-)lys2
tE(UUC)E3	(-)lys2
tE(UUC)G1 SOE1	(-)met15
tE(UUC)G2	(-)lys2
tE(UUC)G3	(-)lys2
tE(UUC)I	(-)met15
tE(UUC)J	(-)lys2
tE(UUC)K	(-)met15
tE(UUC)M	(-)lys2
tE(UUC)P	(-)lys2
tF(GAA)D	(-)met15
tF(GAA)F	(-)lys2
tF(GAA)G	(-)met15
tF(GAA)H1	(-)lys2
tF(GAA)H2	(-)lys2
tF(GAA)M	(-)lys2
tF(GAA)N	(-)lys2
tF(GAA)P1	(-)met15
tF(GAA)P2	(-)lys2
tG(CCC)O SUF5	(-)met15
tG(GCC)C SUF16	(-)lys2
tG(GCC)D1	(-)lys2
tG(GCC)D2	(-)met15
tG(GCC)E	(-)lys2
tG(GCC)F1 SUF20	(-)lys2
tG(GCC)G1	(-)lys2
tG(GCC)G2	(-)lys2
tG(GCC)J2	(-)lys2
tG(GCC)M	(-)lys2
tG(GCC)P1	(-)lys2
tG(UCC)G SUF4	(-)met15
tG(UCC)N SUF6	(-)lys2
tG(UCC)O SUF1	(-)lys2
tH(GUG)E1	(-)lys2
tH(GUG)E2	(-)lys2
tH(GUG)G1	(-)lys2
tH(GUG)G2	(-)lys2
tH(GUG)K	(-)lys2
tH(GUG)M	(-)lys2
tI(AAU)B	(-)lys2
tI(AAU)D	(-)met15
tI(AAU)E1	(-)met15
tI(AAU)G	(-)lys2
tI(AAU)I2	(-)lys2
tI(AAU)L1	(-)met15
tI(AAU)L2	(-)lys2
tI(AAU)N2	(-)lys2
tI(AAU)P1	(-)met15
tI(AAU)P2	(-)lys2
tI(UAU)D	(-)lys2
tK(CUU)D1	(-)lys2
tK(CUU)D2	(-)lys2
tK(CUU)E2	(-)met15
tK(CUU)F	(-)met15
tK(CUU)G1	(-)lys2
tK(CUU)G2	(-)lys2
tK(CUU)I	(-)lys2
tK(CUU)M	(-)lys2
tK(CUU)P	(-)lys2
tK(UUU)D	(-)lys2
tK(UUU)G2	(-)lys2
tK(UUU)L	(-)lys2
tK(UUU)O	(-)lys2
tK(UUU)P	(-)lys2
tL(CAA)A SUP56	(-)lys2
tL(CAA)C SUP53	(-)lys2
tL(CAA)G1	(-)met15
tL(CAA)G2 SUP54	(-)lys2
tL(CAA)G3	(-)lys2
tL(CAA)K	(-)lys2
tL(CAA)L	(-)lys2
tL(CAA)M	(-)lys2
tL(GAG)G	(-)lys2
tL(UAA)D	(-)lys2
tL(UAA)J SUP51	(-)lys2
tL(UAA)K	(-)met15
tL(UAA)L	(-)lys2
tL(UAA)N	(-)lys2
tL(UAG)L1	(-)lys2
tL(UAG)L2	(-)met15
tM(CAU)C	(-)lys2
tN(GUU)F	(-)lys2
tN(GUU)G	(-)lys2
tN(GUU)K	(-)lys2
tN(GUU)L	(-)met15
tN(GUU)N1	(-)lys2
tN(GUU)N2	(-)lys2
tN(GUU)O1	(-)lys2
tP(AGG)N SUF10	(-)lys2
tP(UGG)F SUF9	(-)lys2
tP(UGG)L	(-)lys2
tP(UGG)M SUF7	(-)met15
tP(UGG)N2	(-)lys2
tQ(UUG)B	(-)lys2
tQ(UUG)D1	(-)met15
tQ(UUG)D3	(-)lys2
tQ(UUG)E1	(-)lys2
tQ(UUG)E2	(-)lys2
tQ(UUG)L	(-)met15
tR(ACG)D	(-)lys2
tR(ACG)E	(-)lys2
tR(ACG)J	(-)lys2
tR(ACG)K	(-)met15
tR(ACG)O	(-)lys2
tR(UCU)G2	(-)lys2
tR(UCU)G3	(-)lys2
tR(UCU)J1	(-)lys2
tR(UCU)J2	(-)lys2
tR(UCU)K	(-)lys2
tR(UCU)M1	(-)lys2
tR(UCU)M2	(-)lys2
tS(AGA)B	(-)lys2
tS(AGA)D2	(-)lys2
tS(AGA)D3	(-)lys2
tS(AGA)G	(-)lys2
tS(AGA)H	(-)met15
tS(AGA)J	(-)lys2
tS(AGA)M	(-)lys2
tS(GCU)L	(-)lys2
tS(GCU)O	(-)met15
tS(UGA)I SUP17	(-)lys2
tS(UGA)P SUP16	(-)lys2
tT(AGU)B	(-)lys2
tT(AGU)C	(-)lys2
tT(AGU)I1	(-)lys2
tT(AGU)I2	(-)lys2
tT(AGU)N1	(-)lys2
tT(AGU)N2	(-)lys2
tT(AGU)O1	(-)met15
tT(AGU)O2	(-)lys2
tT(CGU)K TRN1	(-)met15
tT(UGU)G1	(-)met15
tT(UGU)G2	(-)met15
tT(UGU)P	(-)lys2
tV(AAC)E1	(-)lys2
tV(AAC)E2	(-)met15
tV(AAC)G2	(-)met15
tV(AAC)G3	(-)lys2
tV(AAC)J	(-)lys2
tV(AAC)K2	(-)lys2
tV(AAC)M1	(-)lys2
tV(AAC)M2	(-)lys2
tV(AAC)M3	(-)lys2
tV(AAC)O	(-)lys2
tV(CAC)D	(-)lys2
tW(CCA)G1	(-)lys2
tW(CCA)G2	(-)lys2
tW(CCA)M	(-)lys2
tX(XXX)D	(-)lys2
tY(GUA)D SUP2	(-)lys2
tY(GUA)F1 SUP11	(-)lys2
tY(GUA)J1 SUP7	(-)lys2
tY(GUA)M1 SUP5	(-)lys2

## Sheet: Homozygote
Homozygote ncRNA KOs
CUT001/437
CUT002
CUT008
CUT015
CUT040
CUT083
CUT084/SUT068
CUT095
CUT103
CUT123
CUT142
CUT150
CUT170
CUT244
CUT248
CUT296
CUT332
CUT353/SUT758
CUT356
CUT379
CUT424
CUT436
CUT441
CUT442
CUT458
CUT461
CUT462
CUT468
CUT474
CUT541/542/SUT503
CUT572
CUT575
CUT645
CUT666
CUT764
CUT782
CUT816
ncRNA RUF21
ncRNA TLC1
SNR10
SNR11
SNR13
SNR17A
SNR17B
SNR189
SNR3
SNR31
SNR32
SNR33
SNR34
SNR36
SNR37
SNR39B
SNR4
SNR41
SNR42
SNR46
SNR47
SNR49
SNR5
SNR50
SNR51
SNR51/70/41
SNR52
SNR56
SNR61
SNR61/55/57
SNR62
SNR63
SNR64
SNR65
SNR66
SNR67
SNR69
SNR70
SNR71
SNR72
SNR72/73/74/75/76/77/78
SNR73
SNR74
SNR75
SNR76
SNR77
SNR78
SNR79
SNR8
SNR80
SNR81
SNR82
SNR83
SNR84
SNR86
SNR87
SNR9
SUT001
SUT004
SUT010
SUT014
SUT035
SUT042
SUT049
SUT053/468/CUT494
SUT053/468/CUT494
SUT055
SUT056
SUT058
SUT067
SUT071/483
SUT098
SUT107
SUT119
SUT125
SUT126
SUT129
SUT131
SUT167
SUT171
SUT174
SUT193
SUT211
SUT218/655
SUT219/656
SUT233/CUT707
SUT234
SUT239/679
SUT249
SUT274/698
SUT284/712
SUT304/730
SUT305
SUT329
SUT346
SUT347
SUT355
SUT361
SUT362
SUT385
SUT388
SUT398
SUT413
SUT417
SUT418
SUT420/CUT425
SUT430
SUT431
SUT465
SUT469
SUT471
SUT473/CUT502
SUT477
SUT479
SUT492
SUT501
SUT515
SUT518
SUT532
SUT539
SUT570
SUT571
SUT616
SUT733
SUT737/313
SUT764
SUT796
SUT824
SUT827
SUT830
SUT834
SUT842/425
SUT847
tA(AGC)F
tA(AGC)G
tA(AGC)H
tA(AGC)J
tA(AGC)M2
tA(UGC)A
tA(UGC)G
tA(UGC)L
tA(UGC)O
tC(GCA)P1
tD(GUC)G1
tD(GUC)G2
tD(GUC)I1
tD(GUC)J1
tD(GUC)J3
tD(GUC)J4
tD(GUC)L2
tD(GUC)M
tD(GUC)O
tE(CUC)D
tE(CUC)I
tE(UUC)B
tE(UUC)C
tE(UUC)E2
tE(UUC)G1 SOE1
tE(UUC)G3
tE(UUC)I
tE(UUC)J
tE(UUC)K
tE(UUC)M
tE(UUC)P
tF(GAA)D
tF(GAA)F
tF(GAA)G
tF(GAA)H1
tF(GAA)H2
tF(GAA)M
tF(GAA)N
tF(GAA)P1
tF(GAA)P2
tG(CCC)O SUF5
tG(GCC)C SUF16
tG(GCC)D1
tG(GCC)D2
tG(GCC)E
tG(GCC)F1 SUF20
tG(GCC)G1
tG(GCC)M
tG(GCC)O2 SUF17
tG(GCC)P1
tG(UCC)G SUF4
tG(UCC)N SUF6
tH(GUG)E1
tH(GUG)G1
tH(GUG)G2
tH(GUG)K
tH(GUG)M
tI(AAU)B
tI(AAU)E1
tI(AAU)G
tI(AAU)I2
tI(AAU)L1
tI(AAU)L2
tI(AAU)P1
tI(AAU)P2
tI(UAU)D
tK(CUU)D1
tK(CUU)D2
tK(CUU)E2
tK(CUU)F
tK(CUU)G1
tK(CUU)G2
tK(CUU)I
tK(CUU)M
tK(UUU)D
tK(UUU)G2
tK(UUU)L
tK(UUU)P
tL(CAA)A SUP56
tL(CAA)C SUP53
tL(CAA)G1
tL(CAA)G2 SUP54
tL(CAA)G3
tL(CAA)K
tL(CAA)L
tL(CAA)M
tL(GAG)G
tL(UAA)D
tL(UAA)J SUP51
tL(UAA)K
tL(UAA)L
tL(UAA)N
tL(UAG)L2
tM(CAU)C
tN(GUU)F
tN(GUU)G
tN(GUU)K
tN(GUU)L
tN(GUU)N1
tN(GUU)N2
tN(GUU)O1
tP(AGG)N SUF10
tP(UGG)F SUF9
tP(UGG)L
tP(UGG)M SUF7
tP(UGG)N2
tQ(UUG)B
tQ(UUG)D1
tQ(UUG)D3
tQ(UUG)E1
tQ(UUG)E2
tQ(UUG)L
tR(ACG)D
tR(ACG)E
tR(ACG)J
tR(ACG)K
tR(ACG)O
tR(UCU)G2
tR(UCU)G3
tR(UCU)J1
tR(UCU)J2
tR(UCU)K
tR(UCU)M1
tR(UCU)M2
tS(AGA)B
tS(AGA)D3
tS(AGA)G
tS(AGA)H
tS(AGA)J
tS(AGA)M
tS(GCU)L
tS(GCU)O
tS(UGA)I SUP17
tS(UGA)P SUP16
tT(AGU)B
tT(AGU)C
tT(AGU)I1
tT(AGU)I2
tT(AGU)N1
tT(AGU)N2
tT(AGU)O1
tT(AGU)O2
tT(CGU)K TRN1
tT(UGU)G1
tT(UGU)G2
tT(UGU)P
tV(AAC)E1
tV(AAC)E2
tV(AAC)G2
tV(AAC)G3
tV(AAC)J
tV(AAC)K2
tV(AAC)M2
tV(AAC)O
tV(CAC)D
tW(CCA)G1
tW(CCA)G2
tW(CCA)M
tX(XXX)D
tY(GUA)J1 SUP7
tY(GUA)M1 SUP5
