# Supplementary material for: A resource for functional profiling of noncoding RNA in the yeast Saccharomyces cerevisiae
Source: RNA. 2017 Aug;23(8):1166–71. doi: 10.1261/rna.061564.117 (PMC5513061; doi:10.1261/rna.061564.117)
Supplement: Supplemental Material [file supp_061564.117_Supplemental_Table_1.xlsx]

## Sheet: collection comparisons
orange	- missing in the Mat a or Mat α collection, or both, but present in the heterozygote collection
	- missing in the heterozygote collection but present in the Mat a or Mat α collection, or both
Heterozygote ncRNA KOs		Mat a ncRNA KOs		Matα ncRNA KOs
CUT001/437		CUT001/437		CUT001/437
CUT002		CUT002		CUT002
CUT005		CUT005		CUT005
CUT008		CUT008		CUT008
CUT015		CUT015		CUT015
CUT040		CUT040		CUT040
CUT058		CUT058		CUT058
CUT083		CUT083		CUT083
CUT084/SUT068		CUT084/SUT068		CUT084/SUT068
CUT095		CUT095		CUT095
CUT102		CUT102		CUT102
CUT103		CUT103		CUT103
CUT123		CUT123		CUT123
CUT142		CUT142		CUT142
CUT150		CUT150		CUT150
CUT170		CUT170		CUT170
CUT244		CUT244		CUT244
CUT248		CUT248		CUT248
CUT277		CUT277		CUT277
CUT296		CUT296		CUT296
CUT332		CUT332		CUT332
CUT353/SUT758		CUT353/SUT758		CUT353/SUT758
CUT356		CUT356		CUT356
CUT374		CUT374		CUT374
CUT378		CUT378		CUT378
CUT379		CUT379		CUT379
CUT424		CUT424		CUT424
CUT436		CUT436		CUT436
CUT441		CUT441		CUT441
CUT442		CUT442		CUT442
CUT458		CUT458		CUT458
CUT461		CUT461		CUT461
CUT462		CUT462		CUT462
CUT468		CUT468		CUT468
CUT474		CUT474		CUT474
CUT494		CUT494		CUT494
CUT502		CUT502		CUT502
CUT523		CUT523		CUT523
CUT541/542/SUT503		CUT541/542/SUT503		CUT541/542/SUT503
CUT546		CUT546		CUT546
CUT547		CUT547		CUT547
CUT572		CUT572		CUT572
CUT575		CUT575		CUT575
CUT645		CUT645		CUT645
CUT666		CUT666		CUT666
CUT672		CUT672		CUT672
CUT764		CUT764		CUT764
CUT775/SUT307		CUT775/SUT307		CUT775/SUT307
CUT782		CUT782		CUT782
CUT816		CUT816		CUT816
CUT827		CUT827		CUT827
ncRNA NME1		ncRNA NME1		ncRNA NME1
ncRNA RPR1		ncRNA RPR1		ncRNA RPR1
ncRNA RUF21		ncRNA RUF21		ncRNA RUF21
ncRNA TLC1		ncRNA TLC1		ncRNA TLC1
SNR10		SNR10		SNR10
SNR11		SNR11		SNR11
SNR128 (U14)		SNR128 (U14)		SNR128 (U14)
SNR128/SNR190		SNR128/SNR190		SNR128/SNR190
SNR13		SNR13		SNR13
SNR17A		SNR17A		SNR17A
SNR17B		SNR17B		SNR17B
SNR189		SNR189		SNR189
SNR190		SNR190		SNR190
SNR3		SNR3		SNR3
SNR30		SNR30		SNR30
SNR31		SNR31		SNR31
SNR32		SNR32		SNR32
SNR33		SNR33		SNR33
SNR34		SNR34		SNR34
SNR35		SNR35		SNR35
SNR36		SNR36		SNR36
SNR37		SNR37		SNR37
SNR39B		SNR39B		SNR39B
SNR4		SNR4		SNR4
SNR40		SNR40		SNR40
SNR41		SNR41		SNR41
SNR42		SNR42		SNR42
SNR43		SNR43		SNR43
SNR45		SNR45		SNR45
SNR46		SNR46		SNR46
SNR47		SNR47		SNR47
SNR48		SNR48		SNR48
SNR49		SNR49		SNR49
SNR5		SNR5		SNR5
SNR50		SNR50		SNR50
SNR51		SNR51		SNR51
SNR51/70/41		SNR51/70/41		SNR51/70/41
SNR52		SNR52		SNR52
SNR56		SNR56		SNR56
SNR57		SNR57		SNR57
SNR61		SNR61		SNR61
SNR61/55/57		SNR61/55/57		SNR61/55/57
SNR62		SNR62		SNR62
SNR63		SNR63		SNR63
SNR64		SNR64		SNR64
SNR65		SNR65		SNR65
SNR66		SNR66		SNR66
SNR67		SNR67		SNR67
SNR69		SNR69		SNR69
SNR70		SNR70		SNR70
SNR71		SNR71		SNR71
SNR72		SNR72		SNR72
SNR72/73/74/75/76/77/78		SNR72/73/74/75/76/77/78		SNR72/73/74/75/76/77/78
SNR73		SNR73		SNR73
SNR74		SNR74		SNR74
SNR75		SNR75		SNR75
SNR76		SNR76		SNR76
SNR77		SNR77		SNR77
SNR78		SNR78		SNR78
SNR79		SNR79		SNR79
SNR8		SNR8		SNR8
SNR80		SNR80		SNR80
SNR81		SNR81		SNR81
SNR82		SNR82		SNR82
SNR83		SNR83		SNR83
SNR84		SNR84		SNR84
SNR85		SNR85		SNR85
SNR86		SNR86		SNR86
SNR87		SNR87		SNR87
SNR9		SNR9		SNR9
SUT001		SUT001		SUT001
SUT004		SUT004		SUT004
SUT007		SUT007		SUT007
SUT010		SUT010		SUT010
SUT014		SUT014		SUT014
SUT019		SUT019		SUT019
SUT035		SUT035		SUT035
SUT042		SUT042		SUT042
SUT049		SUT049		SUT049
SUT053/468/CUT494		SUT053/468/CUT494		SUT053/468/CUT494
SUT055		SUT055		SUT055
SUT056		SUT056		SUT056
SUT058		SUT058		SUT058
SUT067		SUT067		SUT067
SUT071/483		SUT071/483		SUT071/483
SUT084/SUT499		SUT084/SUT499		SUT084/SUT499
SUT085		SUT085		SUT085
SUT087		SUT087		SUT087
SUT098		SUT098		SUT098
SUT107		SUT107		SUT107
SUT119		SUT119		SUT119
SUT123		SUT123		SUT123
SUT125		SUT125		SUT125
SUT126		SUT126		SUT126
SUT129		SUT129		SUT129
SUT131		SUT131		SUT131
SUT135		SUT135		SUT135
SUT142		SUT142		SUT142
SUT157/579		SUT157/579		SUT157/579
SUT167		SUT167		SUT167
SUT170		SUT170		SUT170
SUT171		SUT171		SUT171
SUT174		SUT174		SUT174
SUT193		SUT193		SUT193
SUT211		SUT211		SUT211
SUT218/655		SUT218/655		SUT218/655
SUT219/656		SUT219/656		SUT219/656
SUT229/661		SUT229/661		SUT229/661
SUT233/CUT707		SUT233/CUT707		SUT233/CUT707
SUT234		SUT234		SUT234
SUT239/679		SUT239/679		SUT239/679
SUT249		SUT249		SUT249
SUT264		SUT264		SUT264
SUT274/698		SUT274/698		SUT274/698
SUT284/712		SUT284/712		SUT284/712
SUT285		SUT285		SUT285
SUT304/730		SUT304/730		SUT304/730
SUT305		SUT305		SUT305
SUT329		SUT329		SUT329
SUT346		SUT346		SUT346
SUT347		SUT347		SUT347
SUT348		SUT348		SUT348
SUT349/CUT354		SUT349/CUT354		SUT349/CUT354
SUT355		SUT355		SUT355
SUT361		SUT361		SUT361
SUT362		SUT362		SUT362
SUT385		SUT385		SUT385
SUT388		SUT388		SUT388
SUT390		SUT390		SUT390
SUT398		SUT398		SUT398
SUT413		SUT413		SUT413
SUT417		SUT417		SUT417
SUT418		SUT418		SUT418
SUT420/CUT425		SUT420/CUT425		SUT420/CUT425
SUT426		SUT426		SUT426
SUT430		SUT430		SUT430
SUT431		SUT431		SUT431
SUT432		SUT432		SUT432
SUT463		SUT463		SUT463
SUT465		SUT465		SUT465
SUT469		SUT469		SUT469
SUT471		SUT471		SUT471
SUT473/CUT502		SUT473/CUT502		SUT473/CUT502
SUT477		SUT477		SUT477
SUT479		SUT479		SUT479
SUT480		SUT480		SUT480
SUT492		SUT492		SUT492
SUT496		SUT496		SUT496
SUT500		SUT500		SUT500
SUT501		SUT501		SUT501
SUT509		SUT509		SUT509
SUT515		SUT515		SUT515
SUT518		SUT518		SUT518
SUT532		SUT532		SUT532
SUT539		SUT539		SUT539
SUT546/118		SUT546/118		SUT546/118
SUT553		SUT553		SUT553
SUT570		SUT570		SUT570
SUT571		SUT571		SUT571
SUT591		SUT591		SUT591
SUT593		SUT593		SUT593
SUT602/176		SUT602/176		SUT602/176
SUT616		SUT616		SUT616
SUT643		SUT643		SUT643
SUT729/CUT773		SUT729/CUT773		SUT729/CUT773
SUT733		SUT733		SUT733
SUT737/313		SUT737/313		SUT737/313
SUT764		SUT764		SUT764
SUT796		SUT796		SUT796
SUT812		SUT812		SUT812
SUT824		SUT824		SUT824
SUT827		SUT827		SUT827
SUT830		SUT830		SUT830
SUT834		SUT834		SUT834
SUT842/425		SUT842/425		SUT842/425
SUT847		SUT847		SUT847
tA(AGC)F		tA(AGC)F		tA(AGC)F
tA(AGC)G		tA(AGC)G		tA(AGC)G
tA(AGC)H		tA(AGC)H		tA(AGC)H
tA(AGC)J		tA(AGC)J		tA(AGC)J
tA(AGC)K2		tA(AGC)K2		tA(AGC)K2
tA(AGC)L		tA(AGC)L		tA(AGC)L
tA(AGC)M2		tA(AGC)M2		tA(AGC)M2
tA(AGC)P		tA(AGC)P		tA(AGC)P
tA(UGC)A		tA(UGC)A		tA(UGC)A
tA(UGC)E		tA(UGC)E		tA(UGC)E
tA(UGC)G		tA(UGC)G		tA(UGC)G
tA(UGC)L		tA(UGC)L		tA(UGC)L
tA(UGC)O		tA(UGC)O		tA(UGC)O
tC(GCA)B		tC(GCA)B		tC(GCA)B
tC(GCA)G		tC(GCA)G		tC(GCA)G
tC(GCA)P1		tC(GCA)P1		tC(GCA)P1
tC(GCA)P2		tC(GCA)P2		tC(GCA)P2
tD(GUC)B		tD(GUC)B		tD(GUC)B
tD(GUC)D		tD(GUC)D		tD(GUC)D
tD(GUC)G1		tD(GUC)G1		tD(GUC)G1
tD(GUC)G2		tD(GUC)G2		tD(GUC)G2
tD(GUC)I1		tD(GUC)I1		tD(GUC)I1
tD(GUC)J1		tD(GUC)J1		tD(GUC)J1
tD(GUC)J2		tD(GUC)J2		tD(GUC)J2
tD(GUC)J3		tD(GUC)J3		tD(GUC)J3
tD(GUC)J4		tD(GUC)J4		tD(GUC)J4
tD(GUC)L2		tD(GUC)L2		tD(GUC)L2
tD(GUC)M		tD(GUC)M		tD(GUC)M
tD(GUC)N		tD(GUC)N		tD(GUC)N
tD(GUC)O		tD(GUC)O		tD(GUC)O
tE(CUC)D		tE(CUC)D		tE(CUC)D
tE(CUC)I		tE(CUC)I		tE(CUC)I
tE(UUC)B		tE(UUC)B		tE(UUC)B
tE(UUC)C		tE(UUC)C		tE(UUC)C
tE(UUC)E1		tE(UUC)E1		tE(UUC)E1
tE(UUC)E2		tE(UUC)E2		tE(UUC)E2
tE(UUC)E3		tE(UUC)E3		tE(UUC)E3
tE(UUC)G1 SOE1		tE(UUC)G1 SOE1		tE(UUC)G1 SOE1
tE(UUC)G2		tE(UUC)G2		tE(UUC)G2
tE(UUC)G3		tE(UUC)G3		tE(UUC)G3
tE(UUC)I		tE(UUC)I		tE(UUC)I
tE(UUC)J		tE(UUC)J		tE(UUC)J
tE(UUC)K		tE(UUC)K		tE(UUC)K
tE(UUC)M		tE(UUC)M		tE(UUC)M
tE(UUC)P		tE(UUC)P		tE(UUC)P
tF(GAA)B		tF(GAA)B		tF(GAA)B
tF(GAA)D		tF(GAA)D		tF(GAA)D
tF(GAA)F		tF(GAA)F		tF(GAA)F
tF(GAA)G		tF(GAA)G		tF(GAA)G
tF(GAA)H1		tF(GAA)H1		tF(GAA)H1
tF(GAA)H2		tF(GAA)H2		tF(GAA)H2
tF(GAA)M		tF(GAA)M		tF(GAA)M
tF(GAA)N		tF(GAA)N		tF(GAA)N
tF(GAA)P1		tF(GAA)P1		tF(GAA)P1
tF(GAA)P2		tF(GAA)P2		tF(GAA)P2
tG(CCC)O SUF5		tG(CCC)O SUF5		tG(CCC)O SUF5
tG(GCC)B		tG(GCC)B		tG(GCC)B
tG(GCC)C SUF16		tG(GCC)C SUF16		tG(GCC)C SUF16
tG(GCC)D1		tG(GCC)D1		tG(GCC)D1
tG(GCC)D2		tG(GCC)D2		tG(GCC)D2
tG(GCC)E		tG(GCC)E		tG(GCC)E
tG(GCC)F1 SUF20		tG(GCC)F1 SUF20		tG(GCC)F1 SUF20
tG(GCC)G1		tG(GCC)G1		tG(GCC)G1
tG(GCC)G2		tG(GCC)G2		tG(GCC)G2
tG(GCC)J2		tG(GCC)J2		tG(GCC)J2
tG(GCC)M		tG(GCC)M		tG(GCC)M
tG(GCC)O1		tG(GCC)O1		tG(GCC)O1
tG(GCC)O2 SUF17		tG(GCC)O2 SUF17		tG(GCC)O2 SUF17
tG(GCC)P1		tG(GCC)P1		tG(GCC)P1
tG(UCC)G SUF4		tG(UCC)G SUF4		tG(UCC)G SUF4
tG(UCC)N SUF6		tG(UCC)N SUF6		tG(UCC)N SUF6
tG(UCC)O SUF1		tG(UCC)O SUF1		tG(UCC)O SUF1
tH(GUG)E1		tH(GUG)E1		tH(GUG)E1
tH(GUG)E2		tH(GUG)E2		tH(GUG)E2
tH(GUG)G1		tH(GUG)G1		tH(GUG)G1
tH(GUG)G2		tH(GUG)G2		tH(GUG)G2
tH(GUG)K		tH(GUG)K		tH(GUG)K
tH(GUG)M		tH(GUG)M		tH(GUG)M
tI(AAU)B		tI(AAU)B		tI(AAU)B
tI(AAU)D		tI(AAU)D		tI(AAU)D
tI(AAU)E1		tI(AAU)E1		tI(AAU)E1
tI(AAU)G		tI(AAU)G		tI(AAU)G
tI(AAU)I2		tI(AAU)I2		tI(AAU)I2
tI(AAU)L1		tI(AAU)L1		tI(AAU)L1
tI(AAU)L2		tI(AAU)L2		tI(AAU)L2
tI(AAU)N2		tI(AAU)N2		tI(AAU)N2
tI(AAU)P1		tI(AAU)P1		tI(AAU)P1
tI(AAU)P2		tI(AAU)P2		tI(AAU)P2
tI(UAU)D		tI(UAU)D		tI(UAU)D
tI(UAU)L		tI(UAU)L		tI(UAU)L
tK(CUU)D1		tK(CUU)D1		tK(CUU)D1
tK(CUU)D2		tK(CUU)D2		tK(CUU)D2
tK(CUU)E2		tK(CUU)E2		tK(CUU)E2
tK(CUU)F		tK(CUU)F		tK(CUU)F
tK(CUU)G1		tK(CUU)G1		tK(CUU)G1
tK(CUU)G2		tK(CUU)G2		tK(CUU)G2
tK(CUU)G3		tK(CUU)G3		tK(CUU)G3
tK(CUU)I		tK(CUU)I		tK(CUU)I
tK(CUU)K		tK(CUU)K		tK(CUU)K
tK(CUU)M		tK(CUU)M		tK(CUU)M
tK(CUU)P		tK(CUU)P		tK(CUU)P
tK(UUU)D		tK(UUU)D		tK(UUU)D
tK(UUU)G2		tK(UUU)G2		tK(UUU)G2
tK(UUU)L		tK(UUU)L		tK(UUU)L
tK(UUU)O		tK(UUU)O		tK(UUU)O
tK(UUU)P		tK(UUU)P		tK(UUU)P
tL(CAA)A SUP56		tL(CAA)A SUP56		tL(CAA)A SUP56
tL(CAA)C SUP53		tL(CAA)C SUP53		tL(CAA)C SUP53
tL(CAA)G1		tL(CAA)G1		tL(CAA)G1
tL(CAA)G2 SUP54		tL(CAA)G2 SUP54		tL(CAA)G2 SUP54
tL(CAA)G3		tL(CAA)G3		tL(CAA)G3
tL(CAA)K		tL(CAA)K		tL(CAA)K
tL(CAA)L		tL(CAA)L		tL(CAA)L
tL(CAA)M		tL(CAA)M		tL(CAA)M
tL(CAA)N		tL(CAA)N		tL(CAA)N
tL(GAG)G		tL(GAG)G		tL(GAG)G
tL(UAA)B1		tL(UAA)B1		tL(UAA)B1
tL(UAA)D		tL(UAA)D		tL(UAA)D
tL(UAA)J SUP51		tL(UAA)J SUP51		tL(UAA)J SUP51
tL(UAA)K		tL(UAA)K		tL(UAA)K
tL(UAA)L		tL(UAA)L		tL(UAA)L
tL(UAA)N		tL(UAA)N		tL(UAA)N
tL(UAG)J		tL(UAG)J		tL(UAG)J
tL(UAG)L1		tL(UAG)L1		tL(UAG)L1
tL(UAG)L2		tL(UAG)L2		tL(UAG)L2
tN(GUU)C		tM(CAU)C		tM(CAU)C
tN(GUU)F		tN(GUU)F		tN(GUU)F
tN(GUU)G		tN(GUU)G		tN(GUU)G
tN(GUU)K		tN(GUU)K		tN(GUU)K
tN(GUU)L		tN(GUU)L		tN(GUU)L
tN(GUU)N1		tN(GUU)N1		tN(GUU)N1
tN(GUU)N2		tN(GUU)N2		tN(GUU)N2
tN(GUU)O1		tN(GUU)O1		tN(GUU)O1
tP(AGG)C SUF2		tP(AGG)C SUF2		tP(AGG)C SUF2
tP(AGG)N SUF10		tP(AGG)N SUF10		tP(AGG)N SUF10
tP(UGG)A TRN1		tP(UGG)A TRN1		tP(UGG)A TRN1
tP(UGG)F SUF9		tP(UGG)F SUF9		tP(UGG)F SUF9
tP(UGG)L		tP(UGG)L		tP(UGG)L
tP(UGG)M SUF7		tP(UGG)M SUF7		tP(UGG)M SUF7
tP(UGG)N2		tP(UGG)N2		tP(UGG)N2
tP(UGG)O3		tP(UGG)O3		tP(UGG)O3
tQ(CUG)M CDC65		tQ(CUG)M CDC65		tQ(CUG)M CDC65
tQ(UUG)B		tQ(UUG)B		tQ(UUG)B
tQ(UUG)C		tQ(UUG)C		tQ(UUG)C
tQ(UUG)D1		tQ(UUG)D1		tQ(UUG)D1
tQ(UUG)D3		tQ(UUG)D3		tQ(UUG)D3
tQ(UUG)E1		tQ(UUG)E1		tQ(UUG)E1
tQ(UUG)E2		tQ(UUG)E2		tQ(UUG)E2
tQ(UUG)L		tQ(UUG)L		tQ(UUG)L
tR(ACG)D		tR(ACG)D		tR(ACG)D
tR(ACG)E		tR(ACG)E		tR(ACG)E
tR(ACG)J		tR(ACG)J		tR(ACG)J
tR(ACG)K		tR(ACG)K		tR(ACG)K
tR(ACG)L		tR(ACG)L		tR(ACG)L
tR(ACG)O		tR(ACG)O		tR(ACG)O
tR(CCG)L TRR4		tR(CCG)L TRR4		tR(CCG)L TRR4
tR(UCU)B		tR(UCU)B		tR(UCU)B
tR(UCU)E		tR(UCU)E		tR(UCU)E
tR(UCU)G1		tR(UCU)G1		tR(UCU)G1
tR(UCU)G2		tR(UCU)G2		tR(UCU)G2
tR(UCU)G3		tR(UCU)G3		tR(UCU)G3
tR(UCU)J1		tR(UCU)J1		tR(UCU)J1
tR(UCU)J2		tR(UCU)J2		tR(UCU)J2
tR(UCU)K		tR(UCU)K		tR(UCU)K
tR(UCU)M1		tR(UCU)M1		tR(UCU)M1
tR(UCU)M2		tR(UCU)M2		tR(UCU)M2
tS(AGA)A		tS(AGA)A		tS(AGA)A
tS(AGA)B		tS(AGA)B		tS(AGA)B
tS(AGA)D2		tS(AGA)D2		tS(AGA)D2
tS(AGA)D3		tS(AGA)D3		tS(AGA)D3
tS(AGA)E		tS(AGA)E		tS(AGA)E
tS(AGA)G		tS(AGA)G		tS(AGA)G
tS(AGA)H		tS(AGA)H		tS(AGA)H
tS(AGA)J		tS(AGA)J		tS(AGA)J
tS(AGA)M		tS(AGA)M		tS(AGA)M
tS(CGA)C SUP61		tS(CGA)C SUP61		tS(CGA)C SUP61
tS(GCU)F		tS(GCU)F		tS(GCU)F
tS(GCU)L		tS(GCU)L		tS(GCU)L
tS(GCU)O		tS(GCU)O		tS(GCU)O
tS(UGA)I SUP17		tS(UGA)I SUP17		tS(UGA)I SUP17
tS(UGA)P SUP16		tS(UGA)P SUP16		tS(UGA)P SUP16
tT(AGU)B		tT(AGU)B		tT(AGU)B
tT(AGU)C		tT(AGU)C		tT(AGU)C
tT(AGU)D		tT(AGU)D		tT(AGU)D
tT(AGU)I1		tT(AGU)I1		tT(AGU)I1
tT(AGU)I2		tT(AGU)I2		tT(AGU)I2
tT(AGU)J		tT(AGU)J		tT(AGU)J
tT(AGU)N1		tT(AGU)N1		tT(AGU)N1
tT(AGU)N2		tT(AGU)N2		tT(AGU)N2
tT(AGU)O1		tT(AGU)O1		tT(AGU)O1
tT(AGU)O2		tT(AGU)O2		tT(AGU)O2
tT(CGU)K TRT2		tT(CGU)K TRT2		tT(CGU)K TRT2
tT(UGU)G1		tT(UGU)G1		tT(UGU)G1
tT(UGU)G2		tT(UGU)G2		tT(UGU)G2
tT(UGU)H		tT(UGU)H		tT(UGU)H
tT(UGU)P		tT(UGU)P		tT(UGU)P
tV(AAC)E1		tV(AAC)E1		tV(AAC)E1
tV(AAC)E2		tV(AAC)E2		tV(AAC)E2
tV(AAC)G2		tV(AAC)G2		tV(AAC)G2
tV(AAC)G3		tV(AAC)G3		tV(AAC)G3
tV(AAC)H		tV(AAC)H		tV(AAC)H
tV(AAC)J		tV(AAC)J		tV(AAC)J
tV(AAC)K1		tV(AAC)K1		tV(AAC)K1
tV(AAC)K2		tV(AAC)K2		tV(AAC)K2
tV(AAC)L		tV(AAC)L		tV(AAC)L
tV(AAC)M1		tV(AAC)M1		tV(AAC)M1
tV(AAC)M2		tV(AAC)M2		tV(AAC)M2
tV(AAC)M3		tV(AAC)M3		tV(AAC)M3
tV(AAC)O		tV(AAC)O		tV(AAC)O
tV(CAC)D		tV(CAC)D		tV(CAC)D
tV(UAC)D		tV(UAC)D		tV(UAC)D
tW(CCA)G1		tW(CCA)G1		tW(CCA)G1
tW(CCA)G2		tW(CCA)G2		tW(CCA)G2
tW(CCA)J		tW(CCA)J		tW(CCA)J
tW(CCA)M		tW(CCA)M		tW(CCA)M
tX(XXX)D		tX(XXX)D		tX(XXX)D
tY(GUA)D SUP2		tY(GUA)D SUP2		tY(GUA)D SUP2
tY(GUA)F1 SUP11		tY(GUA)F1 SUP11		tY(GUA)F1 SUP11
tY(GUA)F2 SUP6		tY(GUA)F2 SUP6		tY(GUA)F2 SUP6
tY(GUA)J1 SUP7		tY(GUA)J1 SUP7		tY(GUA)J1 SUP7
tY(GUA)J2 SUP4		tY(GUA)J2 SUP4		tY(GUA)J2 SUP4
tY(GUA)M1 SUP5		tY(GUA)M1 SUP5		tY(GUA)M1 SUP5
U1 snRNA SNR19		U1 snRNA SNR19		U1 snRNA SNR19
U2 snRNA LSR1		U2 snRNA LSR1		U2 snRNA LSR1
U4 snRNA SNR14		U4 snRNA SNR14		U4 snRNA SNR14
U5 snRNA SNR7		U5 snRNA SNR7		U5 snRNA SNR7
U6 snRNA SNR6		U6 snRNA SNR6		U6 snRNA SNR6
