# Supplementary material for: A resource for functional profiling of noncoding RNA in the yeast Saccharomyces cerevisiae
Source: RNA. 2017 Aug;23(8):1166–71. doi: 10.1261/rna.061564.117 (PMC5513061; doi:10.1261/rna.061564.117)
Supplement: Supplemental Material [file supp_061564.117_Supplemental_Table_2.xlsx]

## Sheet: Comparison tRNA collections
Heterozygous tRNA deletions this collection	Homozygous tRNA deletions this collection	Mat a tRNA deletions this collection	Mat α tRNA deletions this collection	Mat α tRNA deletions Bloom-Ackermann et al
				tA(AGC)D
tA(AGC)F	tA(AGC)F	tA(AGC)F	tA(AGC)F	tA(AGC)F
tA(AGC)G	tA(AGC)G	tA(AGC)G	tA(AGC)G	tA(AGC)G
tA(AGC)H	tA(AGC)H	tA(AGC)H	tA(AGC)H
tA(AGC)J	tA(AGC)J		tA(AGC)J
				tA(AGC)K1
tA(AGC)K2		tA(AGC)K2		tA(AGC)K2
tA(AGC)L			tA(AGC)L	tA(AGC)L
				tA(AGC)M1
tA(AGC)M2	tA(AGC)M2	tA(AGC)M2	tA(AGC)M2	tA(AGC)M2
tA(AGC)P
	tA(UGC)A	tA(UGC)A	tA(UGC)A	tA(UGC)A
tA(UGC)E		tA(UGC)E		tA(UGC)E
tA(UGC)G	tA(UGC)G	tA(UGC)G	tA(UGC)G	tA(UGC)G
tA(UGC)L	tA(UGC)L	tA(UGC)L	tA(UGC)L	tA(UGC)L
tA(UGC)O	tA(UGC)O	tA(UGC)O	tA(UGC)O
tC(GCA)B		tC(GCA)B		tC(GCA)B
tC(GCA)G		tC(GCA)G
tC(GCA)P1	tC(GCA)P1	tC(GCA)P1	tC(GCA)P1	tC(GCA)P1
tC(GCA)P2		tC(GCA)P2		tC(GCA)P2
tD(GUC)B			tD(GUC)B
tD(GUC)D
	tD(GUC)G1	tD(GUC)G1	tD(GUC)G1	tD(GUC)G1
tD(GUC)G2	tD(GUC)G2	tD(GUC)G2	tD(GUC)G2	tD(GUC)G2
tD(GUC)I1	tD(GUC)I1	tD(GUC)I1	tD(GUC)I1
tD(GUC)J1	tD(GUC)J1	tD(GUC)J1	tD(GUC)J1
tD(GUC)J2		tD(GUC)J2	tD(GUC)J2
tD(GUC)J3	tD(GUC)J3	tD(GUC)J3	tD(GUC)J3
tD(GUC)J4	tD(GUC)J4	tD(GUC)J4	tD(GUC)J4	tD(GUC)J4
				tD(GUC)K
				tD(GUC)L1
tD(GUC)L2	tD(GUC)L2	tD(GUC)L2	tD(GUC)L2
tD(GUC)M	tD(GUC)M	tD(GUC)M	tD(GUC)M	tD(GUC)M
		tD(GUC)N
tD(GUC)O	tD(GUC)O	tD(GUC)O	tD(GUC)O	tD(GUC)O
tE(CUC)D	tE(CUC)D	tE(CUC)D	tE(CUC)D	tE(CUC)D
tE(CUC)I	tE(CUC)I	tE(CUC)I	tE(CUC)I	tE(CUC)I
tE(UUC)B	tE(UUC)B	tE(UUC)B	tE(UUC)B	tE(UUC)B
tE(UUC)C	tE(UUC)C	tE(UUC)C		tE(UUC)C
tE(UUC)E1		tE(UUC)E1	tE(UUC)E1	tE(UUC)E1
tE(UUC)E2	tE(UUC)E2	tE(UUC)E2	tE(UUC)E2
tE(UUC)E3			tE(UUC)E3	tE(UUC)E3
tE(UUC)G1 SOE1	tE(UUC)G1 SOE1	tE(UUC)G1 SOE1	tE(UUC)G1 SOE1	tE(UUC)G1
tE(UUC)G2		tE(UUC)G2	tE(UUC)G2
tE(UUC)G3	tE(UUC)G3	tE(UUC)G3	tE(UUC)G3
tE(UUC)I	tE(UUC)I	tE(UUC)I	tE(UUC)I	tE(UUC)I
tE(UUC)J	tE(UUC)J	tE(UUC)J	tE(UUC)J	tE(UUC)J
tE(UUC)K	tE(UUC)K	tE(UUC)K	tE(UUC)K	tE(UUC)K
				tE(UUC)L
tE(UUC)M	tE(UUC)M	tE(UUC)M	tE(UUC)M	tE(UUC)M
tE(UUC)P	tE(UUC)P	tE(UUC)P	tE(UUC)P	tE(UUC)P
tF(GAA)B
tF(GAA)D	tF(GAA)D	tF(GAA)D	tF(GAA)D	tF(GAA)D
tF(GAA)F	tF(GAA)F	tF(GAA)F	tF(GAA)F	tF(GAA)F
tF(GAA)G	tF(GAA)G	tF(GAA)G	tF(GAA)G	tF(GAA)G
tF(GAA)H1	tF(GAA)H1	tF(GAA)H1	tF(GAA)H1	tF(GAA)H1
tF(GAA)H2	tF(GAA)H2	tF(GAA)H2	tF(GAA)H2	tF(GAA)H2
tF(GAA)M	tF(GAA)M	tF(GAA)M	tF(GAA)M	tF(GAA)M
tF(GAA)N	tF(GAA)N	tF(GAA)N	tF(GAA)N	tF(GAA)N
tF(GAA)P1	tF(GAA)P1	tF(GAA)P1	tF(GAA)P1	tF(GAA)P1
tF(GAA)P2	tF(GAA)P2	tF(GAA)P2	tF(GAA)P2	tF(GAA)P2
				tG(CCC)D
tG(CCC)O SUF5	tG(CCC)O SUF5	tG(CCC)O SUF5	tG(CCC)O SUF5	tG(CCC)O
tG(GCC)B
tG(GCC)C SUF16	tG(GCC)C SUF16	tG(GCC)C SUF16	tG(GCC)C SUF16	tG(GCC)C
tG(GCC)D1	tG(GCC)D1	tG(GCC)D1	tG(GCC)D1	tG(GCC)D1
tG(GCC)D2	tG(GCC)D2	tG(GCC)D2	tG(GCC)D2
tG(GCC)E	tG(GCC)E	tG(GCC)E	tG(GCC)E	tG(GCC)E
tG(GCC)F1 SUF20	tG(GCC)F1 SUF20	tG(GCC)F1 SUF20	tG(GCC)F1 SUF20	tG(GCC)F1
				tG(GCC)F2
tG(GCC)G1	tG(GCC)G1	tG(GCC)G1	tG(GCC)G1	tG(GCC)G1
		tG(GCC)G2	tG(GCC)G2	tG(GCC)G2
				tG(GCC)J1
tG(GCC)J2		tG(GCC)J2	tG(GCC)J2	tG(GCC)J2
	tG(GCC)M	tG(GCC)M	tG(GCC)M
tG(GCC)O1		tG(GCC)O1		tG(GCC)O1
tG(GCC)O2 SUF17	tG(GCC)O2 SUF17	tG(GCC)O2 SUF17		tG(GCC)O2
tG(GCC)P1	tG(GCC)P1	tG(GCC)P1	tG(GCC)P1	tG(GCC)P1
				tG(GCC)P2
tG(UCC)G SUF4	tG(UCC)G SUF4	tG(UCC)G SUF4	tG(UCC)G SUF4	tG(UCC)G
tG(UCC)N SUF6	tG(UCC)N SUF6	tG(UCC)N SUF6	tG(UCC)N SUF6	tG(UCC)N
tG(UCC)O SUF1			tG(UCC)O SUF1	tG(UCC)O
tH(GUG)E1	tH(GUG)E1	tH(GUG)E1	tH(GUG)E1
tH(GUG)E2			tH(GUG)E2	tH(GUG)E2
tH(GUG)G1	tH(GUG)G1	tH(GUG)G1	tH(GUG)G1	tH(GUG)G1
tH(GUG)G2	tH(GUG)G2	tH(GUG)G2	tH(GUG)G2	tH(GUG)G2
				tH(GUG)H
tH(GUG)K	tH(GUG)K	tH(GUG)K	tH(GUG)K
tH(GUG)M	tH(GUG)M	tH(GUG)M	tH(GUG)M
tI(AAU)B	tI(AAU)B	tI(AAU)B	tI(AAU)B
tI(AAU)D		tI(AAU)D	tI(AAU)D	tI(AAU)D
tI(AAU)E1	tI(AAU)E1	tI(AAU)E1	tI(AAU)E1	tI(AAU)E1
				tI(AAU)E2
tI(AAU)G	tI(AAU)G	tI(AAU)G	tI(AAU)G	tI(AAU)G
tI(AAU)I2	tI(AAU)I2	tI(AAU)I2	tI(AAU)I2
tI(AAU)L1	tI(AAU)L1	tI(AAU)L1	tI(AAU)L1	tI(AAU)L1
tI(AAU)L2	tI(AAU)L2	tI(AAU)L2	tI(AAU)L2	tI(AAU)L2
				tI(AAU)N1
tI(AAU)N2			tI(AAU)N2
tI(AAU)P1	tI(AAU)P1	tI(AAU)P1	tI(AAU)P1
tI(AAU)P2	tI(AAU)P2	tI(AAU)P2	tI(AAU)P2
tI(UAU)D	tI(UAU)D	tI(UAU)D	tI(UAU)D
tI(UAU)L
tK(CUU)D1	tK(CUU)D1	tK(CUU)D1	tK(CUU)D1	tK(CUU)D1
tK(CUU)D2	tK(CUU)D2	tK(CUU)D2	tK(CUU)D2
				tK(CUU)E1
tK(CUU)E2	tK(CUU)E2	tK(CUU)E2	tK(CUU)E2	tK(CUU)E2
tK(CUU)F	tK(CUU)F	tK(CUU)F	tK(CUU)F	tK(CUU)F
tK(CUU)G1	tK(CUU)G1	tK(CUU)G1	tK(CUU)G1	tK(CUU)G1
tK(CUU)G2	tK(CUU)G2	tK(CUU)G2	tK(CUU)G2	tK(CUU)G2
tK(CUU)G3				tK(CUU)G3
	tK(CUU)I	tK(CUU)I	tK(CUU)I
tK(CUU)K				tK(CUU)K
tK(CUU)M	tK(CUU)M	tK(CUU)M	tK(CUU)M	tK(CUU)M
tK(CUU)P		tK(CUU)P	tK(CUU)P	tK(CUU)P
tK(UUU)D	tK(UUU)D	tK(UUU)D	tK(UUU)D	tK(UUU)D
				tK(UUU)G1
tK(UUU)G2	tK(UUU)G2	tK(UUU)G2	tK(UUU)G2	tK(UUU)G2
				tK(UUU)K
tK(UUU)L	tK(UUU)L	tK(UUU)L	tK(UUU)L	tK(UUU)L
tK(UUU)O			tK(UUU)O	tK(UUU)O
tK(UUU)P	tK(UUU)P	tK(UUU)P	tK(UUU)P	tK(UUU)P
tL(CAA)A SUP56	tL(CAA)A SUP56	tL(CAA)A SUP56	tL(CAA)A SUP56	tL(CAA)A
	tL(CAA)C SUP53	tL(CAA)C SUP53	tL(CAA)C SUP53
tL(CAA)G1	tL(CAA)G1	tL(CAA)G1	tL(CAA)G1	tL(CAA)G1
tL(CAA)G2 SUP54	tL(CAA)G2 SUP54	tL(CAA)G2 SUP54	tL(CAA)G2 SUP54	tL(CAA)G2
tL(CAA)G3	tL(CAA)G3	tL(CAA)G3	tL(CAA)G3	tL(CAA)G3
tL(CAA)K	tL(CAA)K	tL(CAA)K	tL(CAA)K	tL(CAA)K
tL(CAA)L	tL(CAA)L	tL(CAA)L	tL(CAA)L	tL(CAA)L
tL(CAA)M	tL(CAA)M	tL(CAA)M	tL(CAA)M	tL(CAA)M
tL(CAA)N				tL(CAA)N
tL(GAG)G	tL(GAG)G	tL(GAG)G	tL(GAG)G	tL(GAG)G
tL(UAA)B1		tL(UAA)B1		tL(UAA)B1
				tL(UAA)B2
tL(UAA)D	tL(UAA)D	tL(UAA)D	tL(UAA)D
tL(UAA)J SUP51	tL(UAA)J SUP51	tL(UAA)J SUP51	tL(UAA)J SUP51	tL(UAA)J
tL(UAA)K	tL(UAA)K	tL(UAA)K	tL(UAA)K	tL(UAA)K
	tL(UAA)L	tL(UAA)L	tL(UAA)L	tL(UAA)L
tL(UAA)N	tL(UAA)N	tL(UAA)N	tL(UAA)N	tL(UAA)N
tL(UAG)J		tL(UAG)J		tL(UAG)J
tL(UAG)L1			tL(UAG)L1	tL(UAG)L1
tL(UAG)L2	tL(UAG)L2	tL(UAG)L2	tL(UAG)L2	tL(UAG)L2
tN(GUU)C	tM(CAU)C	tM(CAU)C	tM(CAU)C	tM(CAU)C
				tM(CAU)D
				tM(CAU)E
				tM(CAU)J1
				tM(CAU)J3
				tM(CAU)M
				tM(CAU)O2
				tN(GUU)C
tN(GUU)F	tN(GUU)F	tN(GUU)F	tN(GUU)F	tN(GUU)F
tN(GUU)G	tN(GUU)G	tN(GUU)G	tN(GUU)G	tN(GUU)G
tN(GUU)K	tN(GUU)K	tN(GUU)K	tN(GUU)K	tN(GUU)K
tN(GUU)L	tN(GUU)L	tN(GUU)L	tN(GUU)L
tN(GUU)N1	tN(GUU)N1	tN(GUU)N1	tN(GUU)N1
tN(GUU)N2	tN(GUU)N2	tN(GUU)N2	tN(GUU)N2	tN(GUU)N2
tN(GUU)O1	tN(GUU)O1	tN(GUU)O1	tN(GUU)O1	tN(GUU)O1
	tP(AGG)N SUF10		tP(AGG)N SUF10	tN(GUU)O2
				tN(GUU)P
tP(AGG)C SUF2		tP(AGG)C SUF2		tP(AGG)C
tP(AGG)N SUF10		tP(AGG)N SUF10		tP(AGG)N
tP(UGG)A TRN1				tP(UGG)A
tP(UGG)F SUF9	tP(UGG)F SUF9	tP(UGG)F SUF9	tP(UGG)F SUF9	tP(UGG)F
				tP(UGG)H
tP(UGG)L	tP(UGG)L	tP(UGG)L	tP(UGG)L	tP(UGG)L
tP(UGG)M SUF7	tP(UGG)M SUF7	tP(UGG)M SUF7	tP(UGG)M SUF7	tP(UGG)M
				tP(UGG)N1
tP(UGG)N2	tP(UGG)N2	tP(UGG)N2	tP(UGG)N2	tP(UGG)N2
		tQ(CUG)M CDC65
				tP(UGG)O2
tP(UGG)O3				tP(UGG)O3
tQ(CUG)M CDC65				tQ(CUG)M
tQ(UUG)B	tQ(UUG)B	tQ(UUG)B	tQ(UUG)B	tQ(UUG)B
tQ(UUG)C		tQ(UUG)C		tQ(UUG)C
tQ(UUG)D1	tQ(UUG)D1	tQ(UUG)D1	tQ(UUG)D1	tQ(UUG)D1
tQ(UUG)D3	tQ(UUG)D3	tQ(UUG)D3	tQ(UUG)D3	tQ(UUG)D3
tQ(UUG)E1	tQ(UUG)E1	tQ(UUG)E1	tQ(UUG)E1
tQ(UUG)E2	tQ(UUG)E2	tQ(UUG)E2	tQ(UUG)E2	tQ(UUG)E2
				tQ(UUG)H
tQ(UUG)L	tQ(UUG)L	tQ(UUG)L	tQ(UUG)L	tQ(UUG)L
tR(ACG)D	tR(ACG)D	tR(ACG)D	tR(ACG)D	tR(ACG)D
tR(ACG)E	tR(ACG)E	tR(ACG)E	tR(ACG)E
tR(ACG)J	tR(ACG)J	tR(ACG)J	tR(ACG)J	tR(ACG)J
tR(ACG)K	tR(ACG)K		tR(ACG)K	tR(ACG)K
tR(ACG)L		tR(ACG)L		tR(ACG)L
tR(ACG)O	tR(ACG)O	tR(ACG)O	tR(ACG)O	tR(ACG)O
tR(CCG)L TRR4				tR(CCG)L
				tR(CCU)J
tR(UCU)B
tR(UCU)E				tR(UCU)E
tR(UCU)G1				tR(UCU)G1
tR(UCU)G2	tR(UCU)G2	tR(UCU)G2	tR(UCU)G2
tR(UCU)G3	tR(UCU)G3	tR(UCU)G3	tR(UCU)G3
tR(UCU)J1	tR(UCU)J1	tR(UCU)J1	tR(UCU)J1
tR(UCU)J2	tR(UCU)J2	tR(UCU)J2	tR(UCU)J2
tR(UCU)K	tR(UCU)K	tR(UCU)K	tR(UCU)K	tR(UCU)K
tR(UCU)M1	tR(UCU)M1	tR(UCU)M1	tR(UCU)M1	tR(UCU)M1
tR(UCU)M2	tR(UCU)M2	tR(UCU)M2	tR(UCU)M2	tR(UCU)M2
		tS(AGA)A		tS(AGA)A
tS(AGA)B	tS(AGA)B	tS(AGA)B	tS(AGA)B	tS(AGA)B
				tS(AGA)D1
tS(AGA)D2		tS(AGA)D2	tS(AGA)D2	tS(AGA)D2
tS(AGA)D3	tS(AGA)D3	tS(AGA)D3	tS(AGA)D3	tS(AGA)D3
tS(AGA)E
tS(AGA)G	tS(AGA)G	tS(AGA)G	tS(AGA)G	tS(AGA)G
tS(AGA)H	tS(AGA)H	tS(AGA)H	tS(AGA)H	tS(AGA)H
tS(AGA)J	tS(AGA)J	tS(AGA)J	tS(AGA)J	tS(AGA)J
tS(AGA)M	tS(AGA)M	tS(AGA)M	tS(AGA)M	tS(AGA)M
tS(CGA)C SUP61				tS(CGA)C
tS(GCU)F				tS(GCU)F
tS(GCU)L	tS(GCU)L	tS(GCU)L	tS(GCU)L	tS(GCU)L
tS(GCU)O	tS(GCU)O	tS(GCU)O	tS(GCU)O	tS(GCU)O
				tS(UGA)E
tS(UGA)I SUP17	tS(UGA)I SUP17	tS(UGA)I SUP17	tS(UGA)I SUP17	tS(UGA)I
tS(UGA)P SUP16	tS(UGA)P SUP16	tS(UGA)P SUP16	tS(UGA)P SUP16	tS(UGA)P
tT(AGU)B	tT(AGU)B	tT(AGU)B	tT(AGU)B	tT(AGU)B
tT(AGU)C	tT(AGU)C	tT(AGU)C	tT(AGU)C	tT(AGU)C
tT(AGU)D				tT(AGU)D
				tT(AGU)H
tT(AGU)I1	tT(AGU)I1	tT(AGU)I1	tT(AGU)I1
tT(AGU)I2	tT(AGU)I2	tT(AGU)I2	tT(AGU)I2	tT(AGU)I2
tT(AGU)J				tT(AGU)J
tT(AGU)N1	tT(AGU)N1	tT(AGU)N1	tT(AGU)N1	tT(AGU)N1
tT(AGU)N2	tT(AGU)N2	tT(AGU)N2	tT(AGU)N2	tT(AGU)N2
tT(AGU)O1	tT(AGU)O1	tT(AGU)O1	tT(AGU)O1
	tT(AGU)O2	tT(AGU)O2	tT(AGU)O2	tT(AGU)O2
tT(CGU)K TRT2	tT(CGU)K TRN1	tT(CGU)K TRN1	tT(CGU)K TRN1	tT(CGU)K
tT(UGU)G1	tT(UGU)G1	tT(UGU)G1	tT(UGU)G1
tT(UGU)G2	tT(UGU)G2	tT(UGU)G2	tT(UGU)G2	tT(UGU)G2
tT(UGU)H
tT(UGU)P	tT(UGU)P	tT(UGU)P	tT(UGU)P
tV(AAC)E1	tV(AAC)E1	tV(AAC)E1	tV(AAC)E1	tV(AAC)E1
tV(AAC)E2	tV(AAC)E2	tV(AAC)E2	tV(AAC)E2	tV(AAC)E2
				tV(AAC)G1
tV(AAC)G2	tV(AAC)G2	tV(AAC)G2	tV(AAC)G2	tV(AAC)G2
tV(AAC)G3	tV(AAC)G3	tV(AAC)G3	tV(AAC)G3
tV(AAC)H
tV(AAC)J	tV(AAC)J	tV(AAC)J	tV(AAC)J	tV(AAC)J
tV(AAC)K1				tV(AAC)K1
tV(AAC)K2	tV(AAC)K2	tV(AAC)K2	tV(AAC)K2	tV(AAC)K2
tV(AAC)L		tV(AAC)L		tV(AAC)L
tV(AAC)M1		tV(AAC)M1	tV(AAC)M1	tV(AAC)M1
tV(AAC)M2	tV(AAC)M2	tV(AAC)M2	tV(AAC)M2	tV(AAC)M2
tV(AAC)M3		tV(AAC)M3	tV(AAC)M3	tV(AAC)M3
tV(AAC)O	tV(AAC)O	tV(AAC)O	tV(AAC)O	tV(AAC)O
tV(CAC)D	tV(CAC)D	tV(CAC)D	tV(CAC)D
				tV(UAC)B
tV(UAC)D				tV(UAC)D
tW(CCA)G1	tW(CCA)G1	tW(CCA)G1	tW(CCA)G1	tW(CCA)G1
tW(CCA)G2	tW(CCA)G2	tW(CCA)G2	tW(CCA)G2	tW(CCA)G2
tW(CCA)J		tW(CCA)J		tW(CCA)J
				tW(CCA)K
tW(CCA)M	tW(CCA)M	tW(CCA)M	tW(CCA)M	tW(CCA)M
tX(XXX)D	tX(XXX)D	tX(XXX)D	tX(XXX)D
tY(GUA)D SUP2		tY(GUA)D SUP2	tY(GUA)D SUP2
			tY(GUA)F1 SUP11
tY(GUA)F2 SUP6
tY(GUA)J1 SUP7	tY(GUA)J1 SUP7	tY(GUA)J1 SUP7	tY(GUA)J1 SUP7	tY(GUA)J1
tY(GUA)J2 SUP4				tY(GUA)J2
tY(GUA)M1 SUP5	tY(GUA)M1 SUP5	tY(GUA)M1 SUP5	tY(GUA)M1 SUP5	tY(GUA)M1
				tY(GUA)M2
